# Supplementary material for: International Multicenter Analysis of Brain Structure Across Clinical Stages of Parkinson's Disease
Source: PubMed Central journal article supplement (PMC8595579; doi:10.1002/mds.28706), 2021-07-20
Supplement: NIHMS1714168-supplement-supinfo.pdf [file NIHMS1714168-supplement-supinfo.pdf]

## Table of Contents

|                                                                                                                                           |    |
|-------------------------------------------------------------------------------------------------------------------------------------------|----|
| SUPPLEMENTARY TABLE 1A: SITE-SPECIFIC INCLUSION/EXCLUSION CRITERIA .....                                                                  | 3  |
| SUPPLEMENTARY TABLE 1B: SITE-SPECIFIC MAGNETIC RESONANCE IMAGING (MRI) SCANNER INFORMATION.....                                           | 5  |
| SUPPLEMENTARY TABLE 2A: CORTICAL THICKNESS ANALYSIS RESULTS – WHOLE SAMPLE PD VS CONTROLS .....                                           | 6  |
| SUPPLEMENTARY TABLE 2B: CORTICAL SURFACE AREA ANALYSIS RESULTS – WHOLE SAMPLE PD VS CONTROLS.....                                         | 8  |
| SUPPLEMENTARY TABLE 2C: SUBCORTICAL VOLUME ANALYSIS – WHOLE SAMPLE PD VS CONTROLS .....                                                   | 9  |
| SUPPLEMENTARY TABLE 3A: SUMMARY OF CORTICAL THICKNESS RESULTS IN ANALYSIS OF PD VS HEALTHY CONTROLS ACROSS HY STAGES.....                 | 10 |
| SUPPLEMENTARY TABLE 3B: SUMMARY OF SIGNIFICANT CORTICAL SURFACE AREA RESULTS IN ANALYSIS OF PD VS HEALTHY CONTROLS ACROSS HY STAGES ..... | 10 |
| SUPPLEMENTARY TABLE 3C: SUMMARY OF SUBCORTICAL VOLUME RESULTS IN ANALYSIS OF PD VS HEALTHY CONTROLS ACROSS HY STAGES.....                 | 11 |
| SUPPLEMENTARY TABLE 4A: CORTICAL THICKNESS RESULTS - HY1 PD VS CONTROLS .....                                                             | 11 |
| SUPPLEMENTARY TABLE 4B: CORTICAL THICKNESS RESULTS – HY2 PD VS CONTROLS.....                                                              | 13 |
| SUPPLEMENTARY TABLE 4C: CORTICAL THICKNESS RESULTS – HY3 PD VS CONTROLS.....                                                              | 14 |
| SUPPLEMENTARY TABLE 4D: CORTICAL THICKNESS RESULTS - HY4&5 PD VS CONTROLS .....                                                           | 16 |
| SUPPLEMENTARY TABLE 4E: CORTICAL SURFACE AREA RESULTS - HY1 PD VS CONTROLS.....                                                           | 18 |
| SUPPLEMENTARY TABLE 4F: CORTICAL SURFACE AREA RESULTS - HY2 PD VS CONTROLS.....                                                           | 19 |
| SUPPLEMENTARY TABLE 4G: CORTICAL SURFACE AREA RESULTS - HY3 PD VS CONTROLS .....                                                          | 21 |
| SUPPLEMENTARY TABLE 4H: CORTICAL SURFACE AREA RESULTS - HY4&5 PD VS CONTROLS.....                                                         | 22 |
| SUPPLEMENTARY TABLE 4I: SUBCORTICAL VOLUME RESULTS - HY1 PD VS CONTROLS .....                                                             | 24 |
| SUPPLEMENTARY TABLE 4J: SUBCORTICAL VOLUME RESULTS - HY2 PD VS CONTROLS.....                                                              | 24 |
| SUPPLEMENTARY TABLE 4K: SUBCORTICAL VOLUME RESULTS - HY3 PD VS CONTROLS.....                                                              | 25 |
| SUPPLEMENTARY TABLE 4L: SUBCORTICAL VOLUME RESULTS - HY4&5 PD VS CONTROLS.....                                                            | 25 |
| SUPPLEMENTARY TABLE 5A: RESULTS OF REGRESSION ANALYSIS OF MOCA SCORE AND CORTICAL THICKNESS.....                                          | 26 |
| SUPPLEMENTARY TABLE 5B: RESULTS OF REGRESSION ANALYSIS OF MOCA SCORE AND SURFACE AREA .....                                               | 27 |
| SUPPLEMENTARY TABLE 5C: RESULTS OF REGRESSION ANALYSIS OF MOCA SCORE AND SUBCORTICAL VOLUME .....                                         | 29 |
| SUPPLEMENTARY TABLE 6A: CORTICAL THICKNESS RESULTS - PD (MOCA GROUP) VS CONTROLS .....                                                    | 29 |
| SUPPLEMENTARY TABLE 6B: CORTICAL SURFACE AREA RESULTS - PD (MOCA GROUP) VS CONTROLS .....                                                 | 31 |
| SUPPLEMENTARY TABLE 6C: PD (MOCA GROUP) VS CONTROLS – SUBCORTICAL VOLUMES RESULTS .....                                                   | 32 |
| SUPPLEMENTARY TABLE 7A: CORTICAL THICKNESS RESULTS - HY1 PD VS HY2 PD .....                                                               | 33 |
| SUPPLEMENTARY TABLE 7B: CORTICAL THICKNESS RESULTS - HY2 PD VS HY3PD.....                                                                 | 34 |
| SUPPLEMENTARY TABLE 7C: CORTICAL THICKNESS RESULTS - HY3 PD VS HY4&5 PD .....                                                             | 36 |

|                                                                                                                                                |           |
|------------------------------------------------------------------------------------------------------------------------------------------------|-----------|
| <b>SUPPLEMENTARY TABLE 7D: CORTICAL SURFACE AREA RESULTS - HY1 PD VS HY2 PD.....</b>                                                           | <b>37</b> |
| <b>SUPPLEMENTARY TABLE 7E: CORTICAL SURFACE AREA RESULTS - HY2 PD VS HY3 PD.....</b>                                                           | <b>39</b> |
| <b>SUPPLEMENTARY TABLE 7F: CORTICAL SURFACE AREA RESULTS - HY3 PD VS HY4&amp;5 PD.....</b>                                                     | <b>40</b> |
| <b>SUPPLEMENTARY TABLE 7G: SUBCORTICAL VOLUME RESULTS - HY1 PD VS HY2 PD.....</b>                                                              | <b>42</b> |
| <b>SUPPLEMENTARY TABLE 7H: SUBCORTICAL VOLUME RESULTS - HY2 PD VS HY3 PD.....</b>                                                              | <b>42</b> |
| <b>SUPPLEMENTARY TABLE 7I: SUBCORTICAL VOLUME RESULTS - HY3 PD VS HY4&amp;5 PD.....</b>                                                        | <b>43</b> |
| <b>SUPPLEMENTARY TABLE 8A: HY STAGE 1 ANALYSIS SAMPLE CHARACTERISTICS.....</b>                                                                 | <b>43</b> |
| <b>SUPPLEMENTARY TABLE 8B: HY STAGE 2 ANALYSIS SAMPLE CHARACTERISTICS.....</b>                                                                 | <b>44</b> |
| <b>SUPPLEMENTARY TABLE 8C: HY STAGE 3 ANALYSIS SAMPLE CHARACTERISTICS.....</b>                                                                 | <b>45</b> |
| <b>SUPPLEMENTARY TABLE 8D: HY STAGE 4&amp;5 ANALYSIS SAMPLE CHARACTERISTICS.....</b>                                                           | <b>46</b> |
| <b>SUPPLEMENTARY TABLE 9: OVERLAP CONTROLS IN HY STAGE ANALYSES.....</b>                                                                       | <b>47</b> |
| <b>SUPPLEMENTARY TABLE 10A: GROUP DIFFERENCES ON DURILL ACROSS HY STAGES.....</b>                                                              | <b>47</b> |
| <b>SUPPLEMENTARY TABLE 10B: GROUP DIFFERENCES ON MOCA ACROSS HY STAGES.....</b>                                                                | <b>48</b> |
| <b>SUPPLEMENTARY TABLE 11A: CORTICAL THICKNESS RESULTS - GROUP DIFFERENCES<br/>CORRECTED FOR DURILL ACROSS HY STAGES.....</b>                  | <b>48</b> |
| <b>SUPPLEMENTARY TABLE 11B: CORTICAL SURFACE AREA RESULTS - GROUP DIFFERENCES<br/>CORRECTED FOR DURILL ACROSS HY STAGES.....</b>               | <b>50</b> |
| <b>SUPPLEMENTARY TABLE 11C: SUBCORTICAL VOLUME RESULTS - GROUP DIFFERENCES<br/>CORRECTED FOR DURILL ACROSS HY STAGES.....</b>                  | <b>51</b> |
| <b>SUPPLEMENTARY TABLE 12: MOCA SAMPLE CHARACTERISTICS.....</b>                                                                                | <b>52</b> |
| <b>SUPPLEMENTARY TABLE 13: DURILL SAMPLE CHARACTERISTICS.....</b>                                                                              | <b>52</b> |
| <b>SUPPLEMENTARY TABLE 14A: RESULTS OF REGRESSION ANALYSIS OF DURATION OF ILLNESS<br/>AND CORTICAL THICKNESS.....</b>                          | <b>53</b> |
| <b>SUPPLEMENTARY TABLE 14B: RESULTS OF REGRESSION ANALYSIS OF DURATION OF ILLNESS<br/>AND SURFACE AREA.....</b>                                | <b>55</b> |
| <b>SUPPLEMENTARY TABLE 14C: RESULTS OF REGRESSION ANALYSIS OF DURATION OF ILLNESS<br/>AND SUBCORTICAL VOLUME.....</b>                          | <b>56</b> |
| <b>SUPPLEMENTARY TABLE 14D: RESULTS OF REGRESSION ANALYSIS OF DURATION OF ILLNESS<br/>AND CORTICAL THICKNESS – UNCORRECTED FOR AGE.....</b>    | <b>57</b> |
| <b>SUPPLEMENTARY TABLE 14E: RESULTS OF REGRESSION ANALYSIS OF DURATION OF ILLNESS<br/>AND CORTICAL SURFACE AREA – UNCORRECTED FOR AGE.....</b> | <b>58</b> |
| <b>SUPPLEMENTARY TABLE 14F: RESULTS OF REGRESSION ANALYSIS OF DURATION OF ILLNESS<br/>AND SUBCORTICAL VOLUME – UNCORRECTED FOR AGE.....</b>    | <b>60</b> |
| <b>SUPPLEMENTARY TABLE 15A: CORTICAL THICKNESS RESULTS - MOCA REGRESSION<br/>ANALYSIS CORRECTED FOR DURILL.....</b>                            | <b>61</b> |
| <b>SUPPLEMENTARY TABLE 15B: CORTICAL SURFACE AREA RESULTS - MOCA REGRESSION<br/>ANALYSIS CORRECTED FOR DURILL.....</b>                         | <b>62</b> |
| <b>SUPPLEMENTARY TABLE 15C: SUBCORTICAL VOLUME RESULTS - MOCA REGRESSION<br/>ANALYSIS CORRECTED FOR DURILL.....</b>                            | <b>64</b> |
| <b>SUPPLEMENTARY FIGURE S1: WORLD MAP PARTICIPATING SITES.....</b>                                                                             | <b>65</b> |

**Supplementary Table 1a: Site-specific inclusion/exclusion criteria**

| Site            | Cohort                 | Diagnostic criteria                   | Time between MRI and clinical assessment             | Inclusion/Exclusion criteria<br>PD                                                                                                                                                                                                                                                                                                                                                                                                                                                                                         | HC                                                                                                                                                                                                                                                        |
|-----------------|------------------------|---------------------------------------|------------------------------------------------------|----------------------------------------------------------------------------------------------------------------------------------------------------------------------------------------------------------------------------------------------------------------------------------------------------------------------------------------------------------------------------------------------------------------------------------------------------------------------------------------------------------------------------|-----------------------------------------------------------------------------------------------------------------------------------------------------------------------------------------------------------------------------------------------------------|
| Amsterdam       | Amsterdam I            | UKBB                                  | Same day                                             | <b>Inclusion:</b> consecutive patients seen at the movement disorders outpatient clinic.<br><b>Exclusion:</b> -                                                                                                                                                                                                                                                                                                                                                                                                            | <b>Inclusion:</b> sex and age-matched<br><b>Exclusion:</b> -                                                                                                                                                                                              |
|                 | Amsterdam II (Cogtips) | UKBB                                  | Same day                                             | <b>Inclusion:</b> Subjective cognitive complaints (PD-CFRS > 3), HY stage < 4.<br><b>Exclusion:</b> dementia (SAGE <14 or MoCA < 22), drugs or alcohol abuse (CAGE AID > 1), depressive symptoms (BDI > 18), impulse control disorder (ICD criteria interview), psychotic symptoms (SAPS-PD criteria), tumors and significant vascular abnormalities.                                                                                                                                                                      | No controls                                                                                                                                                                                                                                               |
| Bern            | BE I & II              | UKBB                                  | Within 7 days                                        | <b>Inclusion:</b> PD and familial forms of typical Parkinsonian syndromes, motor complications of dopaminergic medication that are at least moderately bothersome to the patient.<br><b>Exclusion:</b> Age > 85 years, surgical or medical contraindications for a deep brain stimulation (DBS)-implantation, severe medical illness, severe personality disorder, dementia (DSM-V criteria and MMSE < 20, current psychosis, ongoing major depression (BDI-II > 23) or depression of any severity with suicidal ideation. | <b>Inclusion:</b> sex and age-matched<br><b>Exclusion:</b> -                                                                                                                                                                                              |
| Campinas        | UNICAMP                | UKBB                                  | 15.3 days on average (standard deviation=11.1)       | <b>Inclusion:</b> idiopathic PD, taking antiparkinsonian medications, age > 30 years.<br><b>Exclusion:</b> clinically significant musculoskeletal, cardiovascular, respiratory or other neurological disease.                                                                                                                                                                                                                                                                                                              | <b>Inclusion:</b> age > 30 years old.<br><b>Exclusion:</b> clinically significant musculoskeletal, cardiovascular, respiratory or neurological disease.                                                                                                   |
| Chang Gung      | CGU                    | NINDS                                 | Within 30 days, except for one participant (45 days) | <b>Inclusion:</b> diagnosis of probable PD, ability to tolerate treatment discontinuation for 12 hours.<br><b>Exclusion:</b> major physical illnesses, psychiatric disorders, known brain abnormalities, history of intracranial surgery, pharmacotherapy for more than ten years or treatment with drugs able to cross the blood- brain-barrier (other than those used to treat PD).                                                                                                                                      | <b>Inclusion:</b> aged between 50- 90.<br><b>Exclusion:</b> same as in PD.                                                                                                                                                                                |
| Charlottesville | Charlottesville I-III  | PD diagnosis confirmed by neurologist | 73.9 days on average                                 | <b>Inclusion:</b> PD diagnosis with a motor symptom that is not (or inconsistently) responsive to oral medication.<br><b>Exclusion:</b> -                                                                                                                                                                                                                                                                                                                                                                                  | No controls                                                                                                                                                                                                                                               |
| Christchurch    | Christchurch           | UKBB                                  | 28 days on average (standard deviation=48)           | <b>Inclusion:</b> met the UK Parkinson's Society criteria for PD, motor symptoms present for at least 1 year at study entry.<br><b>Exclusion:</b> atypical parkinsonian disorder, history of moderate/severe head injury, stroke, early-life learning disability, major psychiatric or medical illness in the previous 6 months, poor English (precluding testing).                                                                                                                                                        | <b>Inclusion:</b> -<br><b>Exclusion:</b> neurological disease/disorder; history of moderate/severe head injury, stroke, early-life learning disability, major psychiatric or medical illness in the previous 6 months, poor English (precluding testing). |
| Donders         | Donders                | UKBB                                  | Same day                                             | <b>Inclusion:</b> Idiopathic PD, UPDRS tremor-score > 2, dopaminergic therapy with a clear clinical response of non-tremor symptoms (bradykinesia, rigidity), HY stage 1-3.<br><b>Exclusion:</b> Neurological or psychiatric comorbidity, severe head tremor or dyskinesias, cognitive impairment (MMSE < 26), co-medication associated with elongated QT-time, pregnancy, age < 25 years.                                                                                                                                 | <b>Inclusion:</b> same age/gender balance as PD patients<br><b>Exclusion:</b> Neurological or psychiatric disease, cognitive impairment (MMSE < 26), medication associated with elongated QT-time, pregnancy, age < 25 years.                             |
| Graz            | PROMOVE/ ASPS I&II     | QSBB                                  | 90% same day, maximum of 4 weeks                     | <b>Inclusion:</b> Clinical diagnosis of PD.<br><b>Exclusion:</b> MMSE <24, secondary parkinsonism, atypical parkinsonian diseases, a history of neuroleptic drugs,                                                                                                                                                                                                                                                                                                                                                         | <b>Inclusion:</b> No history of previous stroke or dementia and a normal neurologic examination.<br><b>Exclusion:</b> -                                                                                                                                   |

|              |                  |      |                                                                                                                |                                                                                                                                                                                                                                                                                                                                                                                                                                                                                                                                    |                                                                                                                                                                                                                                                                                                                                                                                                                                                                                                                                                                                                   |
|--------------|------------------|------|----------------------------------------------------------------------------------------------------------------|------------------------------------------------------------------------------------------------------------------------------------------------------------------------------------------------------------------------------------------------------------------------------------------------------------------------------------------------------------------------------------------------------------------------------------------------------------------------------------------------------------------------------------|---------------------------------------------------------------------------------------------------------------------------------------------------------------------------------------------------------------------------------------------------------------------------------------------------------------------------------------------------------------------------------------------------------------------------------------------------------------------------------------------------------------------------------------------------------------------------------------------------|
|              |                  |      |                                                                                                                | structural abnormalities on routine MRI scans or a history of previous stroke.                                                                                                                                                                                                                                                                                                                                                                                                                                                     |                                                                                                                                                                                                                                                                                                                                                                                                                                                                                                                                                                                                   |
| Liege        | Liege I & II     | UKBB | Same day                                                                                                       | <b>Inclusion:</b> Non-demented PD patients.<br><b>Exclusion:</b> -                                                                                                                                                                                                                                                                                                                                                                                                                                                                 | <b>Inclusion:</b> age, sex, and highest achieved education level matched.<br><b>Exclusion:</b> -                                                                                                                                                                                                                                                                                                                                                                                                                                                                                                  |
| NW-England   | NW-England I     | UKBB | Same day                                                                                                       | <b>Inclusion:</b> PD diagnosis without known clinical cardiovascular disease or dementia. No other significant neurological conditions.                                                                                                                                                                                                                                                                                                                                                                                            | <b>Inclusion:</b> age-matched to PD group and without a history of idiopathic PD or clinical CVD, or any other significant neurological condition.                                                                                                                                                                                                                                                                                                                                                                                                                                                |
|              | NW-England II    | UKBB | Same day                                                                                                       | <b>Inclusion:</b> as above.<br><b>Exclusion:</b> -                                                                                                                                                                                                                                                                                                                                                                                                                                                                                 | <b>Inclusion:</b> age-matched to PD group and without a history of idiopathic PD or other significant neurological condition.                                                                                                                                                                                                                                                                                                                                                                                                                                                                     |
| Milan        | Milan            | UKBB | Within 1 month                                                                                                 | <b>Inclusion:</b> PD diagnosis.<br><b>Exclusion:</b> -                                                                                                                                                                                                                                                                                                                                                                                                                                                                             | <b>Inclusion:</b> -<br><b>Exclusion:</b> -                                                                                                                                                                                                                                                                                                                                                                                                                                                                                                                                                        |
| NEUROCON     | NEUROCON         | MDS  | Not available                                                                                                  | <b>Inclusion:</b> Early- or moderate stage of PD.<br><b>Exclusion:</b> -                                                                                                                                                                                                                                                                                                                                                                                                                                                           | <b>Inclusion:</b> no history of neurological or psychiatric disease.                                                                                                                                                                                                                                                                                                                                                                                                                                                                                                                              |
| ON Japan     | ON Japan         | UKBB | Not available                                                                                                  | <b>Inclusion:</b> -<br><b>Exclusion:</b> history of other neurological or psychiatric disease, focal white matter abnormalities. ACE-R score $\leq$ 88, psychiatric symptoms (hallucinations, depression etc)                                                                                                                                                                                                                                                                                                                      | <b>Inclusion:</b> -<br><b>Exclusion:</b> neurological disease, family history of PD, or hyposmia, and with an ACE-R score $>$ 88 in the study                                                                                                                                                                                                                                                                                                                                                                                                                                                     |
| Oxford       | Oxford DISCOVERY | UKBB | 108 days on average (standard deviation=104)                                                                   | <b>Inclusion:</b> PD diagnosis within the past 3.5 years. Full details of criteria are available at: Szewczyk-Krolikowski K et. al. (2013). No atypical features to suggest an alternative diagnosis.<br><b>Exclusion:</b> secondary parkinsonism due to head trauma or medication use, atypical parkinsonism syndromes (multiple system atrophy, progressive supra nuclear palsy, corticobasal degeneration, dementia with Lewy bodies), documented postural BP drop on standardized measurement or significant urinary symptoms. | <b>Inclusion:</b> controls without blood relatives with PD.                                                                                                                                                                                                                                                                                                                                                                                                                                                                                                                                       |
| Pennsylvania | Pennsylvania     | UKBB | MoCA: 53.7 days on average (standard deviation=67.1)<br><br>HY: 51.4 days on average (standard deviation=65.0) | <b>Inclusion:</b> clinical diagnosis of PD.<br><b>Exclusion:</b> -                                                                                                                                                                                                                                                                                                                                                                                                                                                                 | <b>Inclusion:</b> $>$ 40 years of age, MMSE $>$ 27, a negative self-reported history of neurological or psychiatric condition, and MRI safe (e.g., no metal, claustrophobia).<br><b>Exclusion:</b> -                                                                                                                                                                                                                                                                                                                                                                                              |
| PPMI         | PPMI 1-21        | MDS  | Same day                                                                                                       | <b>Inclusion &amp; Exclusion</b> criteria detailed here: <a href="http://www.ppmi-info.org/wp-content/uploads/2013/02/PPMI-Protocol-AM5-Final-27Nov2012v6-2.pdf">www.ppmi-info.org/wp-content/uploads/2013/02/PPMI-Protocol-AM5-Final-27Nov2012v6-2.pdf</a> .                                                                                                                                                                                                                                                                      | <b>Inclusion &amp; Exclusion</b> criteria detailed here: <a href="http://www.ppmi-info.org/wp-content/uploads/2013/02/PPMI-Protocol-AM5-Final-27Nov2012v6-2.pdf">www.ppmi-info.org/wp-content/uploads/2013/02/PPMI-Protocol-AM5-Final-27Nov2012v6-2.pdf</a> .                                                                                                                                                                                                                                                                                                                                     |
| Rome SLF     | Rome SLF         | MDS  | 1 day                                                                                                          | <b>Inclusion:</b> diagnosis of idiopathic, MMSE score $>$ 26, no dementia.<br><b>Exclusion:</b> presence of major non stabilized medical, known or suspected history of alcoholism, drug dependence and abuse, head trauma, and mental disorders (apart from mood or anxiety disorders, history of neurological diseases other than idiopathic PD, unclear history of chronic dopaminergic treatment responsiveness.                                                                                                               | <b>Inclusion:</b> vision and hearing sufficient for compliance with testing procedures, laboratory values within normal reference intervals, neuropsychological domain scores above normal cognitive level cutoff scores, corrected for age and educational level.<br><b>Exclusion:</b> dementia or MCI diagnosis, confirmed by a comprehensive neuropsychological battery, MMSE score $<$ 26, presence of major non stabilized medical illnesses, known or suspected history of alcoholism, drug dependence and abuse, head trauma, and mental disorders (apart from mood or anxiety disorders). |
| Stanford     | Stanford         | UKBB | Within 3 months                                                                                                | <b>Inclusion:</b> $>$ 20% improvement on MDS-UPDRS part III ON meds compared to OFF meds.<br><b>Exclusion:</b> -                                                                                                                                                                                                                                                                                                                                                                                                                   | <b>Inclusion:</b> normal neurological exam and normal neuropsychiatric battery (within 1.5 SD of age- and education- adjusted norms).<br><b>Exclusion:</b> -                                                                                                                                                                                                                                                                                                                                                                                                                                      |

|        |        |     |          |                                                                                                                                                                                                                                      |                                            |
|--------|--------|-----|----------|--------------------------------------------------------------------------------------------------------------------------------------------------------------------------------------------------------------------------------------|--------------------------------------------|
| Tao Wu | Tao Wu | MDS | 1-2 days | <b>Inclusion:</b> diagnosis of PD based on medical history, physical and neurological examinations, response to levodopa or dopaminergic drugs, and laboratory tests and MRI scans to exclude other diseases.<br><b>Exclusion:</b> - | <b>Inclusion:</b> -<br><b>Exclusion:</b> - |
|--------|--------|-----|----------|--------------------------------------------------------------------------------------------------------------------------------------------------------------------------------------------------------------------------------------|--------------------------------------------|

Inclusion/exclusion criteria per sample for Parkinson's patients and healthy controls. PD, Parkinson's disease; MDS, Movement Disorders Society; NINDS, National Institute of Neurological Disorders and Stroke; UKBB, United Kingdom Parkinson's Disease Society Brain Bank; QSBB, Queen Square Brain Bank; HY, Hoehn & Yahr; MCI, mild cognitive impairment; MMSE, Mini Mental State Exam; MoCA, Montreal Cognitive Assessment; BDI, Beck's Depression Inventory; UPDRS, Unified Parkinson's Disease Rating Scale; PD-CFRS, Parkinson's Disease Cognitive Functional Rating Scale; SAGE, Self-administered Gerocognitive Examination; CAGE-AID, CAGE Adapted to Include Drugs.

## Supplementary Table 1b: Site-specific magnetic resonance imaging (MRI) scanner information

| Site            | Cohort                 | Scanner Type              | Field Strength | Protocol                                                                                                                                                                                                                                                                                              |
|-----------------|------------------------|---------------------------|----------------|-------------------------------------------------------------------------------------------------------------------------------------------------------------------------------------------------------------------------------------------------------------------------------------------------------|
| Amsterdam       | Amsterdam I            | GE Discovery              | 3T             | Sagittal 3-dimensional gradient-echo T1-weighted sequence (256 x 256 matrix; FOV = 25cm; voxel size = 1 x 0.98 x 0.98 mm; TR = 7.8 ms; TE = 3.0 ms; FA = 12°)                                                                                                                                         |
|                 | Amsterdam II (Cogtips) | GE Discovery              | 3T             |                                                                                                                                                                                                                                                                                                       |
| Bern            | BE I                   | Siemens Verio             | 3T             | MDEFT sequence (1mm <sup>3</sup> isotropic voxel; TR = 7.92ms, TE = 2.48ms, TI=910ms)                                                                                                                                                                                                                 |
|                 | BE II                  | Siemens Trio Tim          | 3T             | As above                                                                                                                                                                                                                                                                                              |
| Campinas        | UNICAMP                | Philips Achieva           | 3T             | 3D T1 weighted image acquired on the sagittal plane (FOV of 240x240mm; 1mm <sup>3</sup> isotropic voxel, TR = 7ms, TE = 3.2ms; FA = 8°)                                                                                                                                                               |
| Chang Gung      | CGU                    | Siemens Magnetom Trio Tim | 3T             | T1-weighted images were acquired using an MPRAGE (224x256 matrix; FOV = 224 mm x 256 mm; 1mm <sup>3</sup> isotropic voxel; TE = 2.63 ms; TR = 2000 ms, FA = 9°)                                                                                                                                       |
| Charlottesville | PDNZ                   | Siemens                   | 3T             | Stock MPRAGE. Acquisition parameters vary by scanner protocol. Voxel size varied but did not exceed 1 x 1 x 1.2 mm.                                                                                                                                                                                   |
| Christchurch    | Christchurch           | General Electric HDx      | 3T             | SPGR sequence                                                                                                                                                                                                                                                                                         |
| Donders         | Donders                | Siemens Trio              | 3T             |                                                                                                                                                                                                                                                                                                       |
| Graz            | PROMOVE/ASPS I & II    | 3T Magnetom Trio/Prisma   | 3T             | PD: structural T1-weighted MPRAGE sequence (1mm <sup>3</sup> isotropic voxel; TR = 1900ms; TI = 900ms; FA = 9°; + TE: 2.19ms (101 patients) + TE: 2.7ms (23 patients)<br>HC: structural T1-weighted MPRAGE sequence (1mm <sup>3</sup> isotropic voxel; TR = 1900ms; TE = 2.19ms; TI = 900ms; FA = 9°) |
| Liege           | Liege I                | Siemens Magnetom Allegra  | 3T             | 3D multi-echo fast low angle shot (FLASH) sequence, (256 x 224 matrix; 1mm <sup>3</sup> isotropic voxel; TR = 18.7 ms; TE = 2.2-14.7 ms; FA = 20°)<br>As above                                                                                                                                        |
|                 | Liege II               | Siemens Magnetom Allegra  | 3T             |                                                                                                                                                                                                                                                                                                       |
| NW-England      | NW-England I           | Philips Achieva           | 3T             | MPRAGE IR Method (voxel size 0.94 x 0.94 x 1 mm; FOV 240 (AP) x 192 (RL) mm TR=8.4ms, TE=3.9ms, TI=1150ms, FA = 8°)<br>As above                                                                                                                                                                       |
|                 | NW-England II          | Philips Achieva           | 3T             |                                                                                                                                                                                                                                                                                                       |
| Milan           | Milan                  | Philips Achieva           | 3T             | 240x240mm matrix; 1mm <sup>3</sup> isotropic voxel; FOV = 33.7x24 cm; TR = 9.81ms; TE = 4.6ms; FA = 8°                                                                                                                                                                                                |
| NEUROCON        | NEUROCON               | Siemens Avanto            | 1.5T           | MPRAGE IR Method. (voxel size 0.97 x 0.97 x 1mm; TR 1940ms TE 3.08ms)                                                                                                                                                                                                                                 |
| ON Japan        | ON Japan               | Siemens Magnetom Verio    | 3T             | High resolution T1-weighted images (256 x 256 matrix size; FOV = 256 mm; TR = 2.5 s, TE = 2.48 ms.)                                                                                                                                                                                                   |
| Oxford          | Oxford DISCOVERY       | Siemens Trio              | 3T             | MPRAGE (1mm <sup>3</sup> isotropic voxel, TE = 4.7 ms; TR = 2040 ms; TI ¼ = 900ms; FA: 8°).                                                                                                                                                                                                           |
| Pennsylvania    | Pennsylvania           | Siemens Trio/Prisma       | 3T             | 3D MPRAGE Sagittal & Axial (Slice thickness = 1mm; TR = 1620/1800/2300ms; TE = 2.95/3.8/3.09ms; TI = 900/950ms)                                                                                                                                                                                       |

|          |           |                        |    |                                                                                                              |
|----------|-----------|------------------------|----|--------------------------------------------------------------------------------------------------------------|
| PPMI     | PPMI 1-21 | Siemens Trio Tim       | 3T | T1-3D e.g. MPRAGE, SPGR, Sagittal (56 x 256 x 170-200 matrix; Slice thickness = 1.2mm; voxel size 1x1x1.2mm) |
| Rome SLF | Rome SLF  | Siemens Allegra        | 3T | T1 MDEFT (256x224 matrix; 1mm <sup>3</sup> isotropic voxel; TR = 7.92ms; TE = 2.4ms; FA = 15°)               |
| Stanford | Stanford  | General Electric SIGNA | 3T | FSPGR 3D T1 scan                                                                                             |
| Tao Wu   | Tao Wu    | Siemens Magnetom Trio  | 3T | MPRAGE IR method (1mm <sup>3</sup> isotropic voxel; TR 1100ms; TE 3.39ms)                                    |

Scanner protocol information for each sample included in analyses. TR = Repetition Time; TE = Echo time; TI = Inversion time; FOV = field of view; FA = flip angle

## Supplementary table 2a: Cortical thickness analysis results – whole sample PD vs controls

| ROI Thickness                  | <i>p</i>         | <i>d</i>      | <i>b</i>      | SE           | Lower CI      | Upper CI      | % diff        | NPD         | NHC         |
|--------------------------------|------------------|---------------|---------------|--------------|---------------|---------------|---------------|-------------|-------------|
| <b>L Banks STS</b>             | <b>&lt;0.001</b> | <b>-0.104</b> | <b>-0.026</b> | <b>0.007</b> | <b>-0.040</b> | <b>-0.012</b> | <b>-1.105</b> | <b>2061</b> | <b>1081</b> |
| <b>R Banks STS</b>             | <b>&lt;0.001</b> | <b>-0.122</b> | <b>-0.031</b> | <b>0.007</b> | <b>-0.045</b> | <b>-0.017</b> | <b>-1.261</b> | <b>2208</b> | <b>1129</b> |
| L Caudal anterior cingulate    | 0.173            | 0.043         | 0.015         | 0.011        | -0.006        | 0.036         | 0.567         | 2297        | 1169        |
| R Caudal anterior cingulate    | 0.384            | -0.027        | -0.009        | 0.010        | -0.028        | 0.011         | -0.345        | 2295        | 1173        |
| <b>L Caudal middle frontal</b> | <b>&lt;0.001</b> | <b>-0.135</b> | <b>-0.027</b> | <b>0.006</b> | <b>-0.039</b> | <b>-0.015</b> | <b>-1.119</b> | <b>2300</b> | <b>1167</b> |
| R Caudal middle frontal        | 0.197            | -0.040        | -0.008        | 0.006        | -0.020        | 0.004         | -0.335        | 2300        | 1167        |
| <b>L Cuneus</b>                | <b>&lt;0.001</b> | <b>-0.112</b> | <b>-0.021</b> | <b>0.006</b> | <b>-0.032</b> | <b>-0.010</b> | <b>-1.157</b> | <b>2142</b> | <b>1118</b> |
| <b>R Cuneus</b>                | <b>&lt;0.001</b> | <b>-0.108</b> | <b>-0.022</b> | <b>0.006</b> | <b>-0.033</b> | <b>-0.011</b> | <b>-1.225</b> | <b>2110</b> | <b>1085</b> |
| L Entorhinal                   | 0.002            | -0.096        | -0.040        | 0.013        | -0.066        | -0.014        | -1.240        | 2260        | 1163        |
| <b>R Entorhinal</b>            | <b>&lt;0.001</b> | <b>-0.100</b> | <b>-0.051</b> | <b>0.014</b> | <b>-0.079</b> | <b>-0.024</b> | <b>-1.510</b> | <b>2201</b> | <b>1145</b> |
| L Frontal pole                 | 0.747            | -0.011        | -0.003        | 0.011        | -0.024        | 0.017         | -0.128        | 2309        | 1169        |
| R Frontal pole                 | 0.003            | -0.094        | -0.030        | 0.010        | -0.051        | -0.010        | -1.154        | 2306        | 1171        |
| <b>L Fusiform</b>              | <b>&lt;0.001</b> | <b>-0.198</b> | <b>-0.043</b> | <b>0.006</b> | <b>-0.055</b> | <b>-0.030</b> | <b>-1.638</b> | <b>2274</b> | <b>1170</b> |
| <b>R Fusiform</b>              | <b>&lt;0.001</b> | <b>-0.117</b> | <b>-0.033</b> | <b>0.007</b> | <b>-0.047</b> | <b>-0.019</b> | <b>-1.260</b> | <b>2288</b> | <b>1172</b> |
| <b>L Inferior parietal</b>     | <b>&lt;0.001</b> | <b>-0.188</b> | <b>-0.036</b> | <b>0.006</b> | <b>-0.047</b> | <b>-0.025</b> | <b>-1.549</b> | <b>2213</b> | <b>1128</b> |
| <b>R Inferior parietal</b>     | <b>&lt;0.001</b> | <b>-0.194</b> | <b>-0.040</b> | <b>0.006</b> | <b>-0.051</b> | <b>-0.029</b> | <b>-1.694</b> | <b>2225</b> | <b>1153</b> |
| <b>L Inferior temporal</b>     | <b>&lt;0.001</b> | <b>-0.193</b> | <b>-0.042</b> | <b>0.007</b> | <b>-0.055</b> | <b>-0.029</b> | <b>-1.578</b> | <b>2211</b> | <b>1110</b> |
| <b>R Inferior temporal</b>     | <b>&lt;0.001</b> | <b>-0.141</b> | <b>-0.033</b> | <b>0.007</b> | <b>-0.046</b> | <b>-0.020</b> | <b>-1.231</b> | <b>2237</b> | <b>1129</b> |
| L Insula                       | 0.269            | -0.036        | -0.008        | 0.007        | -0.022        | 0.006         | -0.273        | 2303        | 1168        |
| R Insula                       | 0.008            | -0.077        | -0.020        | 0.008        | -0.036        | -0.005        | -0.710        | 2294        | 1163        |
| <b>L Isthmus cingulate</b>     | <b>&lt;0.001</b> | <b>-0.177</b> | <b>-0.042</b> | <b>0.008</b> | <b>-0.057</b> | <b>-0.027</b> | <b>-1.792</b> | <b>2302</b> | <b>1173</b> |
| <b>R Isthmus cingulate</b>     | <b>&lt;0.001</b> | <b>-0.178</b> | <b>-0.044</b> | <b>0.008</b> | <b>-0.059</b> | <b>-0.029</b> | <b>-1.869</b> | <b>2297</b> | <b>1175</b> |
| <b>L Lateral occipital</b>     | <b>&lt;0.001</b> | <b>-0.166</b> | <b>-0.030</b> | <b>0.006</b> | <b>-0.042</b> | <b>-0.019</b> | <b>-1.440</b> | <b>2227</b> | <b>1151</b> |
| <b>R Lateral occipital</b>     | <b>&lt;0.001</b> | <b>-0.167</b> | <b>-0.033</b> | <b>0.006</b> | <b>-0.045</b> | <b>-0.021</b> | <b>-1.523</b> | <b>2246</b> | <b>1157</b> |

|                                |                  |               |               |              |               |               |               |             |             |
|--------------------------------|------------------|---------------|---------------|--------------|---------------|---------------|---------------|-------------|-------------|
| <b>L Lateral orbitofrontal</b> | <b>&lt;0.001</b> | <b>-0.125</b> | <b>-0.028</b> | <b>0.006</b> | <b>-0.040</b> | <b>-0.015</b> | <b>-1.089</b> | <b>2305</b> | <b>1168</b> |
| <b>R Lateral orbitofrontal</b> | <b>&lt;0.001</b> | <b>-0.141</b> | <b>-0.034</b> | <b>0.006</b> | <b>-0.046</b> | <b>-0.021</b> | <b>-1.354</b> | <b>2304</b> | <b>1169</b> |
| <b>L Lingual</b>               | <b>&lt;0.001</b> | <b>-0.111</b> | <b>-0.019</b> | <b>0.005</b> | <b>-0.029</b> | <b>-0.009</b> | <b>-0.992</b> | <b>2244</b> | <b>1158</b> |
| <b>R Lingual</b>               | <b>&lt;0.001</b> | <b>-0.094</b> | <b>-0.018</b> | <b>0.005</b> | <b>-0.029</b> | <b>-0.008</b> | <b>-0.927</b> | <b>2203</b> | <b>1126</b> |
| L Medial orbitofrontal         | 0.001            | -0.098        | -0.020        | 0.006        | -0.033        | -0.008        | -0.861        | 2286        | 1166        |
| R Medial orbitofrontal         | 0.015            | -0.067        | -0.016        | 0.007        | -0.029        | -0.003        | -0.696        | 2281        | 1165        |
| <b>L Middle temporal</b>       | <b>&lt;0.001</b> | <b>-0.156</b> | <b>-0.036</b> | <b>0.007</b> | <b>-0.049</b> | <b>-0.022</b> | <b>-1.317</b> | <b>2101</b> | <b>1096</b> |
| <b>R Middle temporal</b>       | <b>&lt;0.001</b> | <b>-0.134</b> | <b>-0.033</b> | <b>0.007</b> | <b>-0.046</b> | <b>-0.020</b> | <b>-1.197</b> | <b>2224</b> | <b>1136</b> |
| <b>L Paracentral</b>           | <b>&lt;0.001</b> | <b>-0.109</b> | <b>-0.025</b> | <b>0.007</b> | <b>-0.038</b> | <b>-0.012</b> | <b>-1.116</b> | <b>2294</b> | <b>1170</b> |
| R Paracentral                  | 0.076            | -0.052        | -0.012        | 0.007        | -0.026        | 0.001         | -0.532        | 2281        | 1173        |
| <b>L Parahippocampal</b>       | <b>&lt;0.001</b> | <b>-0.122</b> | <b>-0.045</b> | <b>0.012</b> | <b>-0.068</b> | <b>-0.021</b> | <b>-1.708</b> | <b>2308</b> | <b>1169</b> |
| <b>R Parahippocampal</b>       | <b>&lt;0.001</b> | <b>-0.108</b> | <b>-0.035</b> | <b>0.010</b> | <b>-0.055</b> | <b>-0.016</b> | <b>-1.371</b> | <b>2296</b> | <b>1173</b> |
| L Pars opercularis             | 0.477            | -0.020        | -0.004        | 0.006        | -0.016        | 0.007         | -0.171        | 2300        | 1174        |
| R Pars opercularis             | 0.364            | -0.026        | -0.006        | 0.006        | -0.018        | 0.006         | -0.230        | 2297        | 1172        |
| <b>L Pars orbitalis</b>        | <b>&lt;0.001</b> | <b>-0.110</b> | <b>-0.028</b> | <b>0.008</b> | <b>-0.043</b> | <b>-0.013</b> | <b>-1.077</b> | <b>2297</b> | <b>1171</b> |
| R Pars orbitalis               | 0.004            | -0.086        | -0.022        | 0.008        | -0.037        | -0.007        | -0.863        | 2296        | 1172        |
| L Pars triangularis            | 0.077            | -0.051        | -0.010        | 0.006        | -0.022        | 0.001         | -0.453        | 2292        | 1174        |
| R Pars triangularis            | 0.353            | -0.027        | -0.005        | 0.006        | -0.017        | 0.006         | -0.235        | 2284        | 1173        |
| L Pericalcarine                | 0.052            | -0.055        | -0.011        | 0.006        | -0.022        | <0.001        | -0.682        | 2149        | 1124        |
| R Pericalcarine                | 0.026            | -0.058        | -0.013        | 0.006        | -0.024        | -0.002        | -0.814        | 2077        | 1070        |
| <b>L Postcentral</b>           | <b>&lt;0.001</b> | <b>-0.110</b> | <b>-0.019</b> | <b>0.005</b> | <b>-0.029</b> | <b>-0.009</b> | <b>-0.971</b> | <b>2175</b> | <b>1130</b> |
| <b>R Postcentral</b>           | <b>&lt;0.001</b> | <b>-0.104</b> | <b>-0.020</b> | <b>0.005</b> | <b>-0.030</b> | <b>-0.010</b> | <b>-0.998</b> | <b>2174</b> | <b>1134</b> |
| L Posterior cingulate          | 0.007            | -0.082        | -0.018        | 0.007        | -0.030        | -0.005        | -0.736        | 2309        | 1173        |
| <b>R Posterior cingulate</b>   | <b>&lt;0.001</b> | <b>-0.156</b> | <b>-0.036</b> | <b>0.006</b> | <b>-0.048</b> | <b>-0.023</b> | <b>-1.503</b> | <b>2308</b> | <b>1174</b> |
| <b>L Precentral</b>            | <b>&lt;0.001</b> | <b>-0.104</b> | <b>-0.023</b> | <b>0.006</b> | <b>-0.035</b> | <b>-0.010</b> | <b>-0.944</b> | <b>2205</b> | <b>1126</b> |
| R Precentral                   | 0.086            | -0.052        | -0.011        | 0.007        | -0.025        | 0.002         | -0.485        | 2220        | 1131        |
| <b>L Precuneus</b>             | <b>&lt;0.001</b> | <b>-0.156</b> | <b>-0.031</b> | <b>0.005</b> | <b>-0.042</b> | <b>-0.020</b> | <b>-1.373</b> | <b>2301</b> | <b>1173</b> |
| <b>R Precuneus</b>             | <b>&lt;0.001</b> | <b>-0.193</b> | <b>-0.038</b> | <b>0.006</b> | <b>-0.049</b> | <b>-0.027</b> | <b>-1.679</b> | <b>2304</b> | <b>1174</b> |
| L Rostral anterior cingulate   | 0.830            | 0.007         | 0.002         | 0.010        | -0.017        | 0.021         | 0.075         | 2285        | 1164        |
| R Rostral anterior cingulate   | 0.732            | -0.010        | -0.003        | 0.010        | -0.022        | 0.015         | -0.121        | 2282        | 1164        |
| L Rostral middle frontal       | 0.001            | -0.088        | -0.016        | 0.005        | -0.026        | -0.007        | -0.728        | 2286        | 1170        |
| R Rostral middle frontal       | 0.063            | -0.047        | -0.010        | 0.005        | -0.021        | 0.001         | -0.452        | 2299        | 1168        |
| <b>L Superior frontal</b>      | <b>&lt;0.001</b> | <b>-0.104</b> | <b>-0.020</b> | <b>0.006</b> | <b>-0.031</b> | <b>-0.009</b> | <b>-0.784</b> | <b>2257</b> | <b>1163</b> |
| <b>R Superior frontal</b>      | <b>&lt;0.001</b> | <b>-0.110</b> | <b>-0.022</b> | <b>0.006</b> | <b>-0.033</b> | <b>-0.011</b> | <b>-0.879</b> | <b>2258</b> | <b>1163</b> |
| <b>L Superior parietal</b>     | <b>&lt;0.001</b> | <b>-0.145</b> | <b>-0.028</b> | <b>0.005</b> | <b>-0.038</b> | <b>-0.017</b> | <b>-1.335</b> | <b>2233</b> | <b>1150</b> |
| <b>R Superior parietal</b>     | <b>&lt;0.001</b> | <b>-0.174</b> | <b>-0.036</b> | <b>0.005</b> | <b>-0.046</b> | <b>-0.025</b> | <b>-1.709</b> | <b>2254</b> | <b>1161</b> |
| L Superior temporal            | 0.001            | -0.096        | -0.021        | 0.007        | -0.034        | -0.008        | -0.819        | 2019        | 1070        |
| R Superior temporal            | 0.002            | -0.077        | -0.019        | 0.006        | -0.032        | -0.007        | -0.739        | 2147        | 1114        |
| <b>L Supramarginal</b>         | <b>&lt;0.001</b> | <b>-0.131</b> | <b>-0.026</b> | <b>0.006</b> | <b>-0.037</b> | <b>-0.014</b> | <b>-1.080</b> | <b>2182</b> | <b>1118</b> |
| <b>R Supramarginal</b>         | <b>&lt;0.001</b> | <b>-0.153</b> | <b>-0.031</b> | <b>0.006</b> | <b>-0.042</b> | <b>-0.019</b> | <b>-1.280</b> | <b>2209</b> | <b>1148</b> |
| L Temporal pole                | 0.002            | -0.102        | -0.040        | 0.013        | -0.066        | -0.015        | -1.132        | 2215        | 1150        |
| R Temporal pole                | 0.001            | -0.096        | -0.043        | 0.013        | -0.069        | -0.017        | -1.174        | 2219        | 1142        |
| L Transverse temporal          | 0.023            | -0.072        | -0.019        | 0.009        | -0.036        | -0.003        | -0.884        | 2319        | 1174        |
| R Transverse temporal          | 0.006            | -0.068        | -0.025        | 0.009        | -0.043        | -0.007        | -1.110        | 2317        | 1175        |

## Supplementary table 2b: Cortical surface area analysis results – whole sample PD vs controls

| ROI Surface Area            | <i>p</i>         | <i>d</i>      | <i>b</i>      | SE           | Lower CI       | Upper CI      | % diff        | NPD         | NHC         |
|-----------------------------|------------------|---------------|---------------|--------------|----------------|---------------|---------------|-------------|-------------|
| L Banks STS                 | 0.923            | -0.003        | -0.56         | 5.76         | -11.86         | 10.75         | -0.056        | 2059        | 1069        |
| R Banks STS                 | 0.280            | 0.036         | 5.25          | 4.86         | -4.29          | 14.79         | 0.577         | 2209        | 1131        |
| L Caudal anterior cingulate | 0.138            | 0.051         | 7.21          | 4.85         | -2.31          | 16.72         | 1.156         | 2296        | 1168        |
| R Caudal anterior cingulate | 0.566            | 0.019         | 3.19          | 5.56         | -7.71          | 14.08         | 0.425         | 2291        | 1172        |
| L Caudal middle frontal     | 0.261            | 0.039         | 13.40         | 11.92        | -9.98          | 36.78         | 0.605         | 2297        | 1165        |
| R Caudal middle frontal     | 0.960            | -0.002        | -0.62         | 12.13        | -24.40         | 23.17         | -0.030        | 2301        | 1166        |
| L Cuneus                    | 0.002            | -0.112        | -23.49        | 7.50         | -38.19         | -8.79         | -1.620        | 2142        | 1110        |
| R Cuneus                    | 0.002            | -0.113        | -23.57        | 7.55         | -38.38         | -8.76         | -1.572        | 2106        | 1063        |
| L Entorhinal                | 0.446            | -0.026        | -2.42         | 3.18         | -8.65          | 3.81          | -0.586        | 2260        | 1162        |
| R Entorhinal                | 0.146            | -0.051        | -4.25         | 2.92         | -9.97          | 1.48          | -1.187        | 2204        | 1143        |
| <b>L Frontal pole</b>       | <b>&lt;0.001</b> | <b>-0.167</b> | <b>-6.53</b>  | <b>1.20</b>  | <b>-8.89</b>   | <b>-4.17</b>  | <b>-3.081</b> | <b>2307</b> | <b>1169</b> |
| R Frontal pole              | 0.185            | -0.043        | -2.04         | 1.54         | -5.05          | 0.98          | -0.734        | 2308        | 1171        |
| L Fusiform                  | 0.231            | -0.040        | -15.47        | 12.92        | -40.80         | 9.86          | -0.497        | 2274        | 1170        |
| R Fusiform                  | 0.198            | -0.043        | -16.44        | 12.78        | -41.49         | 8.61          | -0.540        | 2288        | 1171        |
| L Inferior parietal         | 0.388            | -0.029        | -17.28        | 19.99        | -56.47         | 21.92         | -0.389        | 2214        | 1127        |
| R Inferior parietal         | 0.794            | 0.009         | 5.98          | 22.87        | -38.86         | 50.82         | 0.114         | 2229        | 1153        |
| L Inferior temporal         | 0.084            | -0.059        | -26.98        | 15.61        | -57.58         | 3.62          | -0.840        | 2214        | 1107        |
| R Inferior temporal         | 0.151            | -0.049        | -20.44        | 14.22        | -48.32         | 7.44          | -0.669        | 2239        | 1128        |
| L Insula                    | 0.570            | 0.018         | 4.54          | 7.98         | -11.11         | 20.19         | 0.206         | 2302        | 1160        |
| R Insula                    | 0.986            | 0.001         | 0.17          | 9.26         | -17.98         | 18.31         | 0.007         | 2294        | 1156        |
| L Isthmus cingulate         | 0.007            | 0.093         | 15.71         | 5.79         | 4.36           | 27.07         | 1.572         | 2302        | 1171        |
| R Isthmus cingulate         | 0.003            | 0.100         | 15.66         | 5.22         | 5.42           | 25.90         | 1.696         | 2296        | 1173        |
| <b>L Lateral occipital</b>  | <b>&lt;0.001</b> | <b>-0.118</b> | <b>-69.95</b> | <b>20.05</b> | <b>-109.27</b> | <b>-30.63</b> | <b>-1.477</b> | <b>2229</b> | <b>1151</b> |
| R Lateral occipital         | 0.006            | -0.093        | -56.27        | 20.62        | -96.70         | -15.85        | -1.220        | 2247        | 1155        |
| L Lateral orbitofrontal     | 0.413            | -0.028        | -7.65         | 9.35         | -25.98         | 10.68         | -0.302        | 2305        | 1168        |
| R Lateral orbitofrontal     | 0.113            | 0.053         | 16.13         | 10.18        | -3.84          | 36.10         | 0.652         | 2302        | 1170        |
| L Lingual                   | 0.036            | -0.072        | -30.93        | 14.71        | -59.77         | -2.09         | -1.038        | 2241        | 1155        |
| R Lingual                   | <0.001           | -0.114        | -48.71        | 14.60        | -77.33         | -20.08        | -1.609        | 2204        | 1118        |
| L Medial orbitofrontal      | 0.646            | -0.016        | -3.52         | 7.67         | -18.55         | 11.51         | -0.194        | 2285        | 1160        |
| R Medial orbitofrontal      | 0.219            | -0.041        | -8.27         | 6.72         | -21.44         | 4.90          | -0.459        | 2281        | 1160        |
| L Middle temporal           | 0.009            | -0.092        | -35.19        | 13.42        | -61.49         | -8.88         | -1.178        | 2101        | 1087        |
| R Middle temporal           | 0.022            | -0.077        | -30.35        | 13.28        | -56.39         | -4.30         | -0.922        | 2224        | 1136        |
| L Paracentral               | 0.003            | 0.103         | 19.14         | 6.42         | 6.56           | 31.73         | 1.441         | 2291        | 1169        |
| R Paracentral               | 0.005            | 0.097         | 21.13         | 7.45         | 6.53           | 35.73         | 1.403         | 2281        | 1172        |
| L Parahippocampal           | 0.338            | 0.032         | 3.49          | 3.64         | -3.65          | 10.62         | 0.515         | 2307        | 1170        |
| R Parahippocampal           | 0.024            | 0.076         | 7.53          | 3.33         | 1.00           | 14.06         | 1.154         | 2293        | 1173        |
| L Pars opercularis          | 0.684            | -0.014        | -3.52         | 8.65         | -20.47         | 13.43         | -0.222        | 2303        | 1172        |
| R Pars opercularis          | 0.926            | -0.003        | -0.69         | 7.45         | -15.29         | 13.90         | -0.052        | 2298        | 1168        |
| L Pars orbitalis            | 0.016            | -0.081        | -6.71         | 2.77         | -12.15         | -1.27         | -1.080        | 2295        | 1171        |
| R Pars orbitalis            | 0.802            | 0.009         | 0.87          | 3.49         | -5.96          | 7.71          | 0.116         | 2299        | 1172        |
| L Pars triangularis         | 0.764            | -0.011        | -1.99         | 6.62         | -14.97         | 10.99         | -0.161        | 2292        | 1173        |



|                              |       |        |        |       |        |       |        |      |      |
|------------------------------|-------|--------|--------|-------|--------|-------|--------|------|------|
| R Pars triangularis          | 0.737 | 0.012  | 2.76   | 8.22  | -13.36 | 18.88 | 0.194  | 2285 | 1170 |
| L Pericalcarine              | 0.037 | -0.074 | -18.74 | 8.98  | -36.35 | -1.13 | -1.378 | 2147 | 1113 |
| R Pericalcarine              | 0.094 | -0.060 | -15.76 | 9.42  | -34.22 | 2.70  | -1.065 | 2076 | 1044 |
| L Postcentral                | 0.293 | 0.036  | 15.95  | 15.16 | -13.78 | 45.68 | 0.390  | 2176 | 1132 |
| R Postcentral                | 0.939 | -0.003 | -1.15  | 15.14 | -30.85 | 28.54 | -0.029 | 2172 | 1136 |
| L Posterior cingulate        | 0.102 | 0.056  | 11.36  | 6.95  | -2.27  | 25.00 | 1.005  | 2309 | 1169 |
| R Posterior cingulate        | 0.090 | 0.056  | 10.32  | 6.07  | -1.59  | 22.23 | 0.893  | 2306 | 1172 |
| L Precentral                 | 0.277 | 0.038  | 18.29  | 16.81 | -14.67 | 51.24 | 0.380  | 2204 | 1126 |
| R Precentral                 | 0.027 | 0.076  | 37.80  | 17.04 | 4.39   | 71.22 | 0.784  | 2221 | 1134 |
| L Precuneus                  | 0.305 | -0.035 | -14.98 | 14.61 | -43.63 | 13.67 | -0.407 | 2304 | 1171 |
| R Precuneus                  | 0.687 | 0.014  | 6.21   | 15.43 | -24.04 | 36.45 | 0.162  | 2304 | 1172 |
| L Rostral anterior cingulate | 0.661 | 0.015  | 2.42   | 5.53  | -8.42  | 13.27 | 0.296  | 2280 | 1141 |
| R Rostral anterior cingulate | 0.944 | -0.002 | -0.33  | 4.76  | -9.66  | 9.00  | -0.050 | 2284 | 1157 |
| L Rostral middle frontal     | 0.225 | -0.040 | -27.57 | 22.70 | -72.08 | 16.95 | -0.506 | 2286 | 1171 |
| R Rostral middle frontal     | 0.092 | -0.056 | -40.04 | 23.75 | -86.60 | 6.52  | -0.709 | 2302 | 1168 |
| L Superior frontal           | 0.411 | -0.028 | -19.93 | 24.22 | -67.42 | 27.56 | -0.286 | 2259 | 1149 |
| R Superior frontal           | 0.745 | 0.011  | 7.90   | 24.29 | -39.72 | 55.52 | 0.118  | 2261 | 1161 |
| L Superior parietal          | 0.035 | -0.073 | -44.16 | 20.97 | -85.27 | -3.06 | -0.835 | 2233 | 1150 |
| R Superior parietal          | 0.673 | -0.014 | -8.64  | 20.47 | -48.78 | 31.49 | -0.164 | 2252 | 1160 |
| L Superior temporal          | 0.617 | -0.018 | -7.18  | 14.34 | -35.30 | 20.94 | -0.195 | 2019 | 1062 |
| R Superior temporal          | 0.862 | 0.006  | 2.14   | 12.27 | -21.92 | 26.21 | 0.061  | 2148 | 1113 |
| L Supramarginal              | 0.884 | 0.005  | 2.78   | 19.03 | -34.53 | 40.09 | 0.073  | 2181 | 1116 |
| R Supramarginal              | 0.715 | 0.013  | 6.17   | 16.91 | -27.00 | 39.33 | 0.172  | 2215 | 1149 |
| L Temporal pole              | 0.141 | -0.050 | -3.26  | 2.21  | -7.60  | 1.08  | -0.691 | 2217 | 1150 |
| R Temporal pole              | 0.301 | -0.035 | -2.40  | 2.32  | -6.95  | 2.15  | -0.564 | 2219 | 1141 |
| L Transverse temporal        | 0.010 | 0.088  | 6.92   | 2.67  | 1.68   | 12.16 | 1.549  | 2318 | 1174 |
| R Transverse temporal        | 0.259 | 0.039  | 2.16   | 1.91  | -1.59  | 5.91  | 0.649  | 2318 | 1176 |

Results of cortical surface area analysis in the whole sample of PD vs healthy controls. L – Left, R – Right, ROI – region of interest, Banks STS – Banks of the superior temporal sulcus. **Boldface** denotes significant results after Bonferroni correction

## Supplementary table 2c: Subcortical volume analysis – whole sample PD vs controls

| ROI Subcortical     | <i>p</i>         | <i>d</i>      | <i>b</i>      | SE          | Lower CI     | Upper CI      | % diff        | NPD         | NHC         |
|---------------------|------------------|---------------|---------------|-------------|--------------|---------------|---------------|-------------|-------------|
| <b>L Amygdala</b>   | <b>&lt;0.001</b> | <b>-0.130</b> | <b>-33.64</b> | <b>7.99</b> | <b>-49.3</b> | <b>-17.97</b> | <b>-2.267</b> | <b>2284</b> | <b>1158</b> |
| R Amygdala          | 0.011            | -0.077        | -21.25        | 8.35        | -37.63       | -4.86         | -1.338        | 2279        | 1152        |
| L Caudate nucleus   | 0.028            | -0.071        | -37.44        | 16.99       | -70.75       | -4.13         | -1.083        | 2312        | 1162        |
| R Caudate nucleus   | 0.295            | -0.033        | -17.78        | 16.99       | -51.08       | 15.52         | -0.506        | 2319        | 1173        |
| L Globus pallidus   | 0.026            | -0.066        | -21.63        | 9.74        | -40.73       | -2.52         | -1.420        | 2177        | 1063        |
| R Globus pallidus   | 0.069            | -0.053        | -15.82        | 8.69        | -32.85       | 1.21          | -1.032        | 2248        | 1143        |
| L Hippocampus       | 0.529            | -0.020        | -10.54        | 16.75       | -43.38       | 22.29         | -0.268        | 2265        | 1141        |
| R Hippocampus       | 0.314            | -0.031        | -17.25        | 17.13       | -50.84       | 16.34         | -0.425        | 2302        | 1151        |
| L Lateral ventricle | 0.174            | 0.047         | 343.41        | 252.63      | -151.91      | 838.74        | 2.613         | 2342        | 1169        |
| R Lateral ventricle | 0.028            | 0.077         | 511.96        | 233.14      | 54.86        | 969.05        | 4.243         | 2343        | 1170        |
| L Nucleus accumbens | 0.363            | -0.028        | -3.65         | 4.02        | -11.53       | 4.22          | -0.768        | 2302        | 1158        |
| R Nucleus accumbens | 0.098            | -0.052        | -6.39         | 3.86        | -13.95       | 1.18          | -1.283        | 2264        | 1147        |

|                   |                  |               |                |              |                |               |               |             |             |
|-------------------|------------------|---------------|----------------|--------------|----------------|---------------|---------------|-------------|-------------|
| <b>L Putamen</b>  | <b>&lt;0.001</b> | <b>-0.136</b> | <b>-101.89</b> | <b>24.2</b>  | <b>-149.34</b> | <b>-54.44</b> | <b>-2.031</b> | <b>2163</b> | <b>1068</b> |
| <b>R Putamen</b>  | <b>&lt;0.001</b> | <b>-0.135</b> | <b>-96.94</b>  | <b>22.76</b> | <b>-141.56</b> | <b>-52.31</b> | <b>-2.014</b> | <b>2230</b> | <b>1125</b> |
| <b>L Thalamus</b> | <b>&lt;0.001</b> | <b>0.131</b>  | <b>127.97</b>  | <b>28.29</b> | <b>72.5</b>    | <b>183.44</b> | <b>1.785</b>  | <b>2193</b> | <b>1125</b> |
| R Thalamus        | 0.009            | 0.078         | 61.44          | 23.45        | 15.46          | 107.42        | 0.918         | 2263        | 1139        |

Results of subcortical analysis in the whole sample of PD vs healthy controls. L – Left, R – Right, ROI – region of interest. **Boldface** denotes significant results after Bonferroni correction

### Supplementary table 3a: Summary of cortical thickness results in analysis of PD vs healthy controls across HY stages

| HY1<br>N <sub>PD</sub> 437<br>N <sub>HC</sub> 847 |                     | HY2<br>N <sub>PD</sub> 941<br>N <sub>HC</sub> 908 |                     | HY3<br>N <sub>PD</sub> 263<br>N <sub>HC</sub> 502 |                     | HY4&5<br>N <sub>PD</sub> 85<br>N <sub>HC</sub> 329 |                     |
|---------------------------------------------------|---------------------|---------------------------------------------------|---------------------|---------------------------------------------------|---------------------|----------------------------------------------------|---------------------|
| Significant ROIs<br>(P<7.35x10 <sup>-4</sup> )    | Cohen's<br><i>d</i> | Significant ROIs<br>(P<7.35x10 <sup>-4</sup> )    | Cohen's<br><i>d</i> | Significant ROIs<br>(P<7.35x10 <sup>-4</sup> )    | Cohen's<br><i>d</i> | Significant ROIs<br>(P<7.35x10 <sup>-4</sup> )     | Cohen's<br><i>d</i> |
| L Fusiform                                        | -0.160              | L Fusiform                                        | -0.173              | L Caudal middle frontal                           | -0.258              | L Banks STS                                        | -0.473              |
| L Inferior temporal                               | -0.182              | L Inferior parietal                               | -0.175              | L Entorhinal                                      | -0.276              | L Caudal middle frontal                            | -0.379              |
| R Inferior parietal                               | -0.217              | L Inferior temporal                               | -0.141              | L Fusiform                                        | -0.372              | L Entorhinal                                       | -0.399              |
| R Precuneus                                       | -0.168              | L Isthmus cingulate                               | -0.160              | L Inferior parietal                               | -0.359              | L Fusiform                                         | -0.583              |
| R Superior parietal                               | -0.170              | L Parahippocampal                                 | -0.173              | L Inferior temporal                               | -0.336              | L Inferior parietal                                | -0.522              |
|                                                   |                     | L Precuneus                                       | -0.150              | L Isthmus cingulate                               | -0.283              | L Inferior temporal                                | -0.474              |
|                                                   |                     | L Superior parietal                               | -0.134              | L Lateral occipital                               | -0.220              | L Isthmus cingulate                                | -0.427              |
|                                                   |                     | L Temporal pole                                   | -0.158              | L Lingual                                         | -0.217              | L Lateral orbitofrontal                            | -0.402              |
|                                                   |                     | R Fusiform                                        | -0.132              | L Middle temporal                                 | -0.311              | L Middle temporal                                  | -0.484              |
|                                                   |                     | R Inferior parietal                               | -0.172              | L Paracentral                                     | -0.211              | L Postcentral                                      | -0.343              |
|                                                   |                     | R Isthmus cingulate                               | -0.173              | L Precentral                                      | -0.244              | L Precuneus                                        | -0.421              |
|                                                   |                     | R Lateral occipital                               | -0.136              | L Precuneus                                       | -0.267              | L Superior temporal                                | -0.467              |
|                                                   |                     | R Precuneus                                       | -0.183              | L Superior parietal                               | -0.226              | L Supramarginal                                    | -0.495              |
|                                                   |                     | R Superior parietal                               | -0.151              | L Superior temporal                               | -0.304              | L Transverse temporal                              | -0.367              |
|                                                   |                     | R Supramarginal                                   | -0.146              | L Supramarginal                                   | -0.265              | R Entorhinal                                       | -0.370              |
|                                                   |                     |                                                   |                     | R Banks STS                                       | -0.249              | R Fusiform                                         | -0.407              |
|                                                   |                     |                                                   |                     | R Entorhinal                                      | -0.280              | R Inferior parietal                                | -0.517              |
|                                                   |                     |                                                   |                     | R Fusiform                                        | -0.204              | R Inferior temporal                                | -0.466              |
|                                                   |                     |                                                   |                     | R Inferior parietal                               | -0.321              | R Insula                                           | -0.393              |
|                                                   |                     |                                                   |                     | R Inferior temporal                               | -0.273              | R Isthmus cingulate                                | -0.366              |
|                                                   |                     |                                                   |                     | R Isthmus cingulate                               | -0.237              | R Lateral orbitofrontal                            | -0.484              |
|                                                   |                     |                                                   |                     | R Lateral occipital                               | -0.239              | R Medial orbitofrontal                             | -0.366              |
|                                                   |                     |                                                   |                     | R Middle temporal                                 | -0.230              | R Middle temporal                                  | -0.461              |
|                                                   |                     |                                                   |                     | R Parahippocampal                                 | -0.298              | R Posterior cingulate                              | -0.463              |
|                                                   |                     |                                                   |                     | R Posterior cingulate                             | -0.256              | R Precuneus                                        | -0.449              |
|                                                   |                     |                                                   |                     | R Precuneus                                       | -0.326              | R Superior parietal                                | -0.312              |
|                                                   |                     |                                                   |                     | R Superior frontal                                | -0.220              | R Superior temporal                                | -0.368              |
|                                                   |                     |                                                   |                     | R Superior parietal                               | -0.261              | R Supramarginal                                    | -0.521              |
|                                                   |                     |                                                   |                     | R Superior temporal                               | -0.191              | R Temporal pole                                    | -0.428              |
|                                                   |                     |                                                   |                     | R Supramarginal                                   | -0.300              |                                                    |                     |

### Supplementary table 3b: Summary of significant cortical surface area results in analysis of PD vs healthy controls across HY stages

| HY1<br>N <sub>PD</sub> 437 | HY2<br>N <sub>PD</sub> 941 | HY3<br>N <sub>PD</sub> 263 | HY4&5<br>N <sub>PD</sub> 85 |
|----------------------------|----------------------------|----------------------------|-----------------------------|
|----------------------------|----------------------------|----------------------------|-----------------------------|

| N <sub>HC</sub> 847                         |                  | N <sub>HC</sub> 908                         |                  | N <sub>HC</sub> 502                         |                  | N <sub>HC</sub> 329                         |                  |
|---------------------------------------------|------------------|---------------------------------------------|------------------|---------------------------------------------|------------------|---------------------------------------------|------------------|
| Significant ROIs (P<7.35x10 <sup>-4</sup> ) | Cohen's <i>d</i> | Significant ROIs (P<7.35x10 <sup>-4</sup> ) | Cohen's <i>d</i> | Significant ROIs (P<7.35x10 <sup>-4</sup> ) | Cohen's <i>d</i> | Significant ROIs (P<7.35x10 <sup>-4</sup> ) | Cohen's <i>d</i> |
| L Frontal Pole                              | -0.219           | L Lateral occipital                         | -0.148           | L Frontal Pole                              | -0.291           | L Inferior temporal                         | -0.405           |
|                                             |                  | L Lingual                                   | -0.154           | L Fusiform                                  | -0.260           | L Lateral occipital                         | -0.423           |
|                                             |                  | R Lingual                                   | -0.175           | L Inferior temporal                         | -0.260           | L Precuneus                                 | -0.424           |
|                                             |                  | R Pericalcarine                             | -0.168           | L Lateral occipital                         | -0.324           | R Precuneus                                 | -0.400           |
|                                             |                  | L Lingual                                   | -0.253           |                                             |                  |                                             |                  |
|                                             |                  | L Middle temporal                           | -0.300           |                                             |                  |                                             |                  |
|                                             |                  | L Precuneus                                 | -0.284           |                                             |                  |                                             |                  |
|                                             |                  | L Rostral middle frontal                    | -0.256           |                                             |                  |                                             |                  |
|                                             |                  | L Superior parietal                         | -0.306           |                                             |                  |                                             |                  |
|                                             |                  | R Cuneus                                    | -0.271           |                                             |                  |                                             |                  |
|                                             |                  | R Inferior temporal                         | -0.270           |                                             |                  |                                             |                  |
|                                             |                  | R Lateral occipital                         | -0.286           |                                             |                  |                                             |                  |
|                                             |                  | R Lingual                                   | -0.294           |                                             |                  |                                             |                  |
|                                             |                  | R Middle temporal                           | -0.353           |                                             |                  |                                             |                  |
|                                             |                  | R Rostral middle frontal                    | -0.248           |                                             |                  |                                             |                  |
| R Superior parietal                         | -0.257           |                                             |                  |                                             |                  |                                             |                  |

### Supplementary table 3c: Summary of subcortical volume results in analysis of PD vs healthy controls across HY stages

| HY1<br>N <sub>PD</sub> 437<br>N <sub>HC</sub> 847 |                  | HY2<br>N <sub>PD</sub> 941<br>N <sub>HC</sub> 908 |                  | HY3<br>N <sub>PD</sub> 263<br>N <sub>HC</sub> 502 |                  | HY4&5<br>N <sub>PD</sub> 85<br>N <sub>HC</sub> 329 |                  |
|---------------------------------------------------|------------------|---------------------------------------------------|------------------|---------------------------------------------------|------------------|----------------------------------------------------|------------------|
| Significant ROIs (P<6.25x10 <sup>-5</sup> )       | Cohen's <i>d</i> | Significant ROIs (P<6.25x10 <sup>-5</sup> )       | Cohen's <i>d</i> | Significant ROIs (P<6.25x10 <sup>-5</sup> )       | Cohen's <i>d</i> | Significant ROIs (P<6.25x10 <sup>-5</sup> )        | Cohen's <i>d</i> |
| L Thalamus                                        | 0.151            | L Amygdala                                        | -0.159           | L Amygdala                                        | -0.441           | L Amygdala                                         | -0.640           |
|                                                   |                  | L Putamen                                         | -0.152           | L Caudate nucleus                                 | -0.221           | L Caudate nucleus                                  | -0.330           |
|                                                   |                  | R Amygdala                                        | -0.119           | L Hippocampus                                     | -0.240           | L Globus pallidus                                  | -0.317           |
|                                                   |                  | R Putamen                                         | -0.152           | L Putamen                                         | -0.267           | L Hippocampus                                      | -0.546           |
|                                                   |                  | R Amygdala                                        | -0.316           | L Lateral ventricle                               | -0.357           |                                                    |                  |
|                                                   |                  | R Hippocampus                                     | -0.283           | L Putamen                                         | -0.423           |                                                    |                  |
|                                                   |                  | R Putamen                                         | -0.239           | R Amygdala                                        | -0.554           |                                                    |                  |
|                                                   |                  | R Hippocampus                                     | -0.616           |                                                   |                  |                                                    |                  |
|                                                   |                  | R Lateral ventricle                               | 0.523            |                                                   |                  |                                                    |                  |
|                                                   |                  | R Nucleus accumbens                               | -0.473           |                                                   |                  |                                                    |                  |
| R Putamen                                         | -0.473           |                                                   |                  |                                                   |                  |                                                    |                  |

### Supplementary Table 4a: Cortical thickness results - HY1 PD vs controls

| ROI Thickness               | <i>p</i> | <i>d</i> | <i>b</i> | SE    | Lower CI | Upper CI | % diff | NPD | NHC |
|-----------------------------|----------|----------|----------|-------|----------|----------|--------|-----|-----|
| L Banks STS                 | 0.156    | -0.071   | -0.017   | 0.012 | -0.041   | 0.007    | -0.746 | 383 | 784 |
| R Banks STS                 | 0.013    | -0.118   | -0.030   | 0.012 | -0.053   | -0.006   | -1.233 | 418 | 810 |
| L Caudal anterior cingulate | 0.594    | -0.028   | -0.009   | 0.017 | -0.043   | 0.025    | -0.356 | 433 | 840 |
| R Caudal anterior cingulate | 0.638    | -0.024   | -0.007   | 0.015 | -0.036   | 0.022    | -0.284 | 431 | 843 |
| L Caudal middle frontal     | 0.002    | -0.160   | -0.031   | 0.010 | -0.050   | -0.011   | -1.284 | 430 | 840 |
| R Caudal middle frontal     | 0.302    | -0.054   | -0.011   | 0.010 | -0.031   | 0.010    | -0.447 | 430 | 840 |

|                              |                  |               |               |              |               |               |               |            |            |
|------------------------------|------------------|---------------|---------------|--------------|---------------|---------------|---------------|------------|------------|
| L Cuneus                     | 0.061            | -0.089        | -0.016        | 0.009        | -0.033        | 0.001         | -0.913        | 404        | 807        |
| R Cuneus                     | 0.005            | -0.121        | -0.025        | 0.009        | -0.043        | -0.008        | -1.403        | 400        | 785        |
| L Entorhinal                 | 0.516            | -0.034        | -0.014        | 0.021        | -0.056        | 0.028         | -0.426        | 425        | 837        |
| R Entorhinal                 | 0.415            | -0.035        | -0.018        | 0.022        | -0.061        | 0.025         | -0.526        | 418        | 825        |
| L Frontal pole               | 0.623            | 0.026         | 0.008         | 0.017        | -0.025        | 0.042         | 0.318         | 429        | 841        |
| R Frontal pole               | 0.389            | -0.046        | -0.014        | 0.017        | -0.047        | 0.018         | -0.553        | 430        | 843        |
| <b>L Fusiform</b>            | <b>&lt;0.001</b> | <b>-0.160</b> | <b>-0.034</b> | <b>0.010</b> | <b>-0.053</b> | <b>-0.015</b> | <b>-1.313</b> | <b>426</b> | <b>841</b> |
| R Fusiform                   | 0.020            | -0.097        | -0.028        | 0.012        | -0.051        | -0.004        | -1.053        | 430        | 843        |
| L Inferior parietal          | 0.003            | -0.147        | -0.028        | 0.009        | -0.046        | -0.010        | -1.217        | 426        | 815        |
| <b>R Inferior parietal</b>   | <b>&lt;0.001</b> | <b>-0.217</b> | <b>-0.045</b> | <b>0.009</b> | <b>-0.063</b> | <b>-0.026</b> | <b>-1.906</b> | <b>421</b> | <b>830</b> |
| <b>L Inferior temporal</b>   | <b>&lt;0.001</b> | <b>-0.182</b> | <b>-0.038</b> | <b>0.010</b> | <b>-0.058</b> | <b>-0.018</b> | <b>-1.433</b> | <b>409</b> | <b>804</b> |
| R Inferior temporal          | 0.003            | -0.131        | -0.030        | 0.010        | -0.050        | -0.010        | -1.121        | 423        | 812        |
| L Insula                     | 0.987            | 0.001         | <0.001        | 0.011        | -0.022        | 0.022         | 0.006         | 430        | 840        |
| R Insula                     | 0.271            | -0.052        | -0.013        | 0.012        | -0.037        | 0.010         | -0.459        | 429        | 835        |
| L Isthmus cingulate          | 0.008            | -0.140        | -0.034        | 0.013        | -0.060        | -0.009        | -1.451        | 433        | 843        |
| R Isthmus cingulate          | 0.002            | -0.151        | -0.038        | 0.012        | -0.062        | -0.013        | -1.608        | 432        | 846        |
| L Lateral occipital          | 0.002            | -0.157        | -0.028        | 0.009        | -0.045        | -0.010        | -1.314        | 420        | 827        |
| <b>R Lateral occipital</b>   | <b>&lt;0.001</b> | <b>-0.165</b> | <b>-0.033</b> | <b>0.010</b> | <b>-0.052</b> | <b>-0.014</b> | <b>-1.525</b> | <b>426</b> | <b>832</b> |
| L Lateral orbitofrontal      | 0.003            | -0.140        | -0.029        | 0.010        | -0.048        | -0.010        | -1.152        | 426        | 840        |
| R Lateral orbitofrontal      | 0.031            | -0.094        | -0.021        | 0.010        | -0.041        | -0.002        | -0.866        | 428        | 841        |
| L Lingual                    | 0.027            | -0.105        | -0.018        | 0.008        | -0.034        | -0.002        | -0.938        | 426        | 829        |
| R Lingual                    | 0.159            | -0.060        | -0.012        | 0.008        | -0.029        | 0.005         | -0.606        | 417        | 807        |
| L Medial orbitofrontal       | 0.016            | -0.122        | -0.025        | 0.010        | -0.045        | -0.005        | -1.066        | 425        | 836        |
| R Medial orbitofrontal       | 0.327            | -0.045        | -0.010        | 0.011        | -0.031        | 0.010         | -0.453        | 425        | 837        |
| L Middle temporal            | 0.020            | -0.115        | -0.026        | 0.011        | -0.048        | -0.004        | -0.971        | 386        | 787        |
| R Middle temporal            | 0.006            | -0.120        | -0.029        | 0.011        | -0.050        | -0.008        | -1.067        | 417        | 812        |
| L Paracentral                | 0.008            | -0.125        | -0.028        | 0.011        | -0.049        | -0.007        | -1.251        | 432        | 841        |
| R Paracentral                | 0.076            | -0.084        | -0.020        | 0.011        | -0.042        | 0.002         | -0.863        | 431        | 844        |
| L Parahippocampal            | 0.027            | -0.119        | -0.042        | 0.019        | -0.079        | -0.005        | -1.604        | 432        | 841        |
| R Parahippocampal            | 0.007            | -0.136        | -0.043        | 0.016        | -0.074        | -0.011        | -1.644        | 431        | 844        |
| L Pars opercularis           | 0.828            | -0.010        | -0.002        | 0.009        | -0.021        | 0.016         | -0.085        | 434        | 844        |
| R Pars opercularis           | 0.217            | -0.060        | -0.013        | 0.010        | -0.032        | 0.007         | -0.521        | 433        | 845        |
| L Pars orbitalis             | 0.068            | -0.094        | -0.023        | 0.013        | -0.048        | 0.002         | -0.910        | 425        | 841        |
| R Pars orbitalis             | 0.165            | -0.068        | -0.018        | 0.013        | -0.042        | 0.007         | -0.697        | 427        | 842        |
| L Pars triangularis          | 0.479            | -0.034        | -0.007        | 0.010        | -0.026        | 0.012         | -0.297        | 425        | 844        |
| R Pars triangularis          | 0.661            | -0.020        | -0.004        | 0.009        | -0.022        | 0.014         | -0.179        | 427        | 846        |
| L Pericalcarine              | 0.533            | -0.027        | -0.005        | 0.008        | -0.022        | 0.011         | -0.334        | 411        | 807        |
| R Pericalcarine              | 0.442            | -0.030        | -0.007        | 0.009        | -0.025        | 0.011         | -0.440        | 395        | 771        |
| L Postcentral                | 0.009            | -0.120        | -0.022        | 0.008        | -0.039        | -0.005        | -1.117        | 404        | 813        |
| R Postcentral                | 0.014            | -0.107        | -0.021        | 0.008        | -0.037        | -0.004        | -1.070        | 409        | 816        |
| L Posterior cingulate        | 0.122            | -0.073        | -0.015        | 0.010        | -0.035        | 0.004         | -0.643        | 434        | 843        |
| R Posterior cingulate        | 0.014            | -0.109        | -0.025        | 0.010        | -0.045        | -0.005        | -1.053        | 434        | 845        |
| L Precentral                 | 0.009            | -0.127        | -0.027        | 0.011        | -0.048        | -0.007        | -1.140        | 412        | 812        |
| R Precentral                 | 0.037            | -0.106        | -0.023        | 0.011        | -0.045        | -0.001        | -0.981        | 421        | 813        |
| L Precuneus                  | 0.002            | -0.137        | -0.027        | 0.009        | -0.044        | -0.010        | -1.196        | 430        | 844        |
| <b>R Precuneus</b>           | <b>&lt;0.001</b> | <b>-0.168</b> | <b>-0.033</b> | <b>0.009</b> | <b>-0.050</b> | <b>-0.016</b> | <b>-1.461</b> | <b>431</b> | <b>844</b> |
| L Rostral anterior cingulate | 0.885            | -0.007        | -0.002        | 0.015        | -0.032        | 0.027         | -0.081        | 426        | 835        |
| R Rostral anterior cingulate | 0.383            | -0.041        | -0.013        | 0.014        | -0.041        | 0.016         | -0.472        | 428        | 837        |
| L Rostral middle frontal     | 0.032            | -0.095        | -0.017        | 0.008        | -0.033        | -0.002        | -0.769        | 424        | 841        |

|                            |                  |               |               |              |               |               |               |            |            |
|----------------------------|------------------|---------------|---------------|--------------|---------------|---------------|---------------|------------|------------|
| R Rostral middle frontal   | 0.690            | -0.016        | -0.004        | 0.009        | -0.021        | 0.014         | -0.162        | 427        | 842        |
| L Superior frontal         | 0.012            | -0.121        | -0.024        | 0.009        | -0.042        | -0.005        | -0.924        | 423        | 839        |
| R Superior frontal         | 0.014            | -0.113        | -0.023        | 0.009        | -0.041        | -0.005        | -0.899        | 423        | 840        |
| L Superior parietal        | 0.013            | -0.116        | -0.022        | 0.009        | -0.038        | -0.005        | -1.037        | 416        | 826        |
| <b>R Superior parietal</b> | <b>&lt;0.001</b> | <b>-0.170</b> | <b>-0.036</b> | <b>0.009</b> | <b>-0.053</b> | <b>-0.018</b> | <b>-1.708</b> | <b>426</b> | <b>837</b> |
| L Superior temporal        | 0.082            | -0.087        | -0.019        | 0.011        | -0.041        | 0.002         | -0.740        | 378        | 766        |
| R Superior temporal        | 0.332            | -0.041        | -0.010        | 0.011        | -0.031        | 0.010         | -0.391        | 404        | 800        |
| L Supramarginal            | 0.071            | -0.090        | -0.018        | 0.010        | -0.037        | 0.002         | -0.754        | 413        | 809        |
| R Supramarginal            | 0.016            | -0.114        | -0.023        | 0.010        | -0.043        | -0.004        | -0.977        | 419        | 829        |
| L Temporal pole            | 0.144            | -0.078        | -0.029        | 0.020        | -0.068        | 0.010         | -0.812        | 413        | 829        |
| R Temporal pole            | 0.965            | 0.002         | 0.001         | 0.020        | -0.039        | 0.041         | 0.025         | 416        | 819        |
| L Transverse temporal      | 0.905            | 0.006         | 0.002         | 0.014        | -0.026        | 0.029         | 0.077         | 434        | 844        |
| R Transverse temporal      | 0.975            | 0.001         | <0.001        | 0.015        | -0.029        | 0.030         | 0.021         | 435        | 845        |

Results of cortical thickness analysis of HY1 stage PD vs matched healthy controls. L – Left, R – Right, ROI – region of interest, Banks STS – Banks of the superior temporal sulcus. **Boldface** denotes significant results after Bonferroni correction

## Supplementary Table 4b: Cortical thickness results – HY2 PD vs controls

| ROI Thickness               | <i>p</i>         | <i>d</i>      | <i>b</i>      | SE           | Lower CI      | Upper CI      | % diff        | NPD        | NHC        |
|-----------------------------|------------------|---------------|---------------|--------------|---------------|---------------|---------------|------------|------------|
| L Banks STS                 | 0.006            | -0.104        | -0.027        | 0.010        | -0.047        | -0.008        | -1.184        | 819        | 832        |
| R Banks STS                 | 0.005            | -0.109        | -0.029        | 0.010        | -0.048        | -0.009        | -1.185        | 887        | 870        |
| L Caudal anterior cingulate | 0.150            | 0.060         | 0.021         | 0.015        | -0.008        | 0.050         | 0.815         | 928        | 901        |
| R Caudal anterior cingulate | 0.980            | 0.001         | <0.001        | 0.013        | -0.025        | 0.026         | 0.014         | 926        | 906        |
| L Caudal middle frontal     | 0.011            | -0.100        | -0.021        | 0.008        | -0.038        | -0.005        | -0.884        | 933        | 898        |
| R Caudal middle frontal     | 0.321            | -0.041        | -0.008        | 0.008        | -0.025        | 0.008         | -0.354        | 929        | 898        |
| L Cuneus                    | 0.002            | -0.121        | -0.024        | 0.008        | -0.038        | -0.009        | -1.335        | 871        | 867        |
| R Cuneus                    | 0.018            | -0.085        | -0.019        | 0.008        | -0.035        | -0.003        | -1.054        | 841        | 843        |
| L Entorhinal                | 0.005            | -0.115        | -0.049        | 0.018        | -0.083        | -0.015        | -1.518        | 912        | 899        |
| R Entorhinal                | <0.001           | -0.117        | -0.063        | 0.019        | -0.100        | -0.026        | -1.858        | 881        | 883        |
| L Frontal pole              | 0.950            | 0.003         | 0.001         | 0.014        | -0.027        | 0.029         | 0.034         | 935        | 902        |
| R Frontal pole              | 0.106            | -0.068        | -0.023        | 0.014        | -0.051        | 0.005         | -0.879        | 932        | 905        |
| <b>L Fusiform</b>           | <b>&lt;0.001</b> | <b>-0.173</b> | <b>-0.039</b> | <b>0.009</b> | <b>-0.057</b> | <b>-0.022</b> | <b>-1.531</b> | <b>922</b> | <b>901</b> |
| <b>R Fusiform</b>           | <b>&lt;0.001</b> | <b>-0.132</b> | <b>-0.041</b> | <b>0.010</b> | <b>-0.060</b> | <b>-0.021</b> | <b>-1.556</b> | <b>930</b> | <b>904</b> |
| <b>L Inferior parietal</b>  | <b>&lt;0.001</b> | <b>-0.175</b> | <b>-0.036</b> | <b>0.008</b> | <b>-0.051</b> | <b>-0.020</b> | <b>-1.558</b> | <b>899</b> | <b>875</b> |
| <b>R Inferior parietal</b>  | <b>&lt;0.001</b> | <b>-0.172</b> | <b>-0.038</b> | <b>0.008</b> | <b>-0.054</b> | <b>-0.022</b> | <b>-1.629</b> | <b>901</b> | <b>890</b> |
| <b>L Inferior temporal</b>  | <b>&lt;0.001</b> | <b>-0.141</b> | <b>-0.032</b> | <b>0.009</b> | <b>-0.050</b> | <b>-0.015</b> | <b>-1.219</b> | <b>905</b> | <b>867</b> |
| R Inferior temporal         | 0.004            | -0.107        | -0.027        | 0.009        | -0.044        | -0.009        | -0.988        | 910        | 876        |
| L Insula                    | 0.134            | -0.064        | -0.015        | 0.010        | -0.034        | 0.005         | -0.511        | 934        | 901        |
| R Insula                    | 0.049            | -0.077        | -0.021        | 0.011        | -0.042        | <0.001        | -0.739        | 926        | 897        |
| <b>L Isthmus cingulate</b>  | <b>&lt;0.001</b> | <b>-0.160</b> | <b>-0.041</b> | <b>0.011</b> | <b>-0.061</b> | <b>-0.020</b> | <b>-1.731</b> | <b>933</b> | <b>904</b> |
| <b>R Isthmus cingulate</b>  | <b>&lt;0.001</b> | <b>-0.173</b> | <b>-0.046</b> | <b>0.011</b> | <b>-0.066</b> | <b>-0.025</b> | <b>-1.974</b> | <b>928</b> | <b>906</b> |
| L Lateral occipital         | 0.001            | -0.131        | -0.025        | 0.008        | -0.041        | -0.010        | -1.220        | 921        | 883        |
| <b>R Lateral occipital</b>  | <b>&lt;0.001</b> | <b>-0.136</b> | <b>-0.029</b> | <b>0.008</b> | <b>-0.046</b> | <b>-0.013</b> | <b>-1.359</b> | <b>916</b> | <b>891</b> |
| L Lateral orbitofrontal     | 0.054            | -0.073        | -0.016        | 0.008        | -0.033        | <0.001        | -0.647        | 936        | 900        |
| R Lateral orbitofrontal     | 0.005            | -0.100        | -0.024        | 0.009        | -0.041        | -0.007        | -0.980        | 931        | 901        |
| L Lingual                   | 0.006            | -0.105        | -0.020        | 0.007        | -0.034        | -0.006        | -1.028        | 903        | 891        |
| R Lingual                   | 0.043            | -0.072        | -0.015        | 0.008        | -0.030        | <0.001        | -0.773        | 884        | 865        |

|                              |                  |               |               |              |               |               |               |            |            |
|------------------------------|------------------|---------------|---------------|--------------|---------------|---------------|---------------|------------|------------|
| L Medial orbitofrontal       | 0.007            | -0.111        | -0.023        | 0.009        | -0.040        | -0.006        | -0.996        | 924        | 898        |
| R Medial orbitofrontal       | 0.124            | -0.058        | -0.014        | 0.009        | -0.032        | 0.004         | -0.608        | 919        | 899        |
| <b>L Middle temporal</b>     | <b>&lt;0.001</b> | <b>-0.136</b> | <b>-0.032</b> | <b>0.010</b> | <b>-0.051</b> | <b>-0.014</b> | <b>-1.214</b> | <b>854</b> | <b>846</b> |
| R Middle temporal            | 0.009            | -0.095        | -0.024        | 0.009        | -0.042        | -0.006        | -0.896        | 901        | 874        |
| L Paracentral                | 0.008            | -0.103        | -0.025        | 0.010        | -0.044        | -0.007        | -1.134        | 929        | 901        |
| R Paracentral                | 0.113            | -0.061        | -0.015        | 0.010        | -0.034        | 0.004         | -0.677        | 922        | 904        |
| <b>L Parahippocampal</b>     | <b>&lt;0.001</b> | <b>-0.173</b> | <b>-0.066</b> | <b>0.016</b> | <b>-0.097</b> | <b>-0.035</b> | <b>-2.533</b> | <b>937</b> | <b>902</b> |
| R Parahippocampal            | 0.005            | -0.114        | -0.038        | 0.014        | -0.065        | -0.012        | -1.487        | 925        | 905        |
| L Pars opercularis           | 0.902            | 0.005         | 0.001         | 0.008        | -0.015        | 0.017         | 0.041         | 935        | 905        |
| R Pars opercularis           | 0.262            | -0.043        | -0.009        | 0.008        | -0.026        | 0.007         | -0.391        | 932        | 906        |
| L Pars orbitalis             | 0.109            | -0.064        | -0.017        | 0.011        | -0.038        | 0.004         | -0.668        | 931        | 903        |
| R Pars orbitalis             | 0.059            | -0.075        | -0.020        | 0.010        | -0.040        | 0.001         | -0.787        | 929        | 904        |
| L Pars triangularis          | 0.443            | -0.029        | -0.006        | 0.008        | -0.022        | 0.010         | -0.278        | 935        | 905        |
| R Pars triangularis          | 0.241            | -0.044        | -0.009        | 0.008        | -0.025        | 0.006         | -0.411        | 927        | 907        |
| L Pericalcarine              | 0.016            | -0.086        | -0.017        | 0.007        | -0.031        | -0.003        | -1.092        | 865        | 870        |
| R Pericalcarine              | 0.128            | -0.051        | -0.012        | 0.008        | -0.028        | 0.003         | -0.761        | 828        | 827        |
| L Postcentral                | 0.011            | -0.095        | -0.018        | 0.007        | -0.032        | -0.004        | -0.913        | 890        | 864        |
| R Postcentral                | 0.006            | -0.099        | -0.020        | 0.007        | -0.034        | -0.006        | -1.021        | 884        | 871        |
| L Posterior cingulate        | 0.151            | -0.057        | -0.013        | 0.009        | -0.030        | 0.005         | -0.537        | 935        | 904        |
| R Posterior cingulate        | 0.001            | -0.122        | -0.029        | 0.009        | -0.046        | -0.012        | -1.227        | 934        | 905        |
| L Precentral                 | 0.070            | -0.071        | -0.017        | 0.009        | -0.035        | 0.001         | -0.702        | 898        | 860        |
| R Precentral                 | 0.309            | -0.040        | -0.010        | 0.009        | -0.028        | 0.009         | -0.412        | 896        | 867        |
| <b>L Precuneus</b>           | <b>&lt;0.001</b> | <b>-0.150</b> | <b>-0.032</b> | <b>0.008</b> | <b>-0.047</b> | <b>-0.017</b> | <b>-1.427</b> | <b>934</b> | <b>904</b> |
| <b>R Precuneus</b>           | <b>&lt;0.001</b> | <b>-0.183</b> | <b>-0.040</b> | <b>0.008</b> | <b>-0.055</b> | <b>-0.024</b> | <b>-1.769</b> | <b>930</b> | <b>905</b> |
| L Rostral anterior cingulate | 0.649            | 0.020         | 0.006         | 0.013        | -0.020        | 0.031         | 0.218         | 922        | 895        |
| R Rostral anterior cingulate | 0.881            | -0.006        | -0.002        | 0.013        | -0.027        | 0.023         | -0.071        | 919        | 897        |
| L Rostral middle frontal     | 0.360            | -0.033        | -0.006        | 0.007        | -0.020        | 0.007         | -0.286        | 924        | 901        |
| R Rostral middle frontal     | 0.972            | -0.001        | <0.001        | 0.007        | -0.015        | 0.014         | -0.011        | 929        | 901        |
| L Superior frontal           | 0.045            | -0.078        | -0.016        | 0.008        | -0.032        | <0.001        | -0.629        | 909        | 894        |
| R Superior frontal           | 0.010            | -0.096        | -0.020        | 0.008        | -0.035        | -0.005        | -0.790        | 910        | 894        |
| <b>L Superior parietal</b>   | <b>&lt;0.001</b> | <b>-0.134</b> | <b>-0.028</b> | <b>0.007</b> | <b>-0.042</b> | <b>-0.013</b> | <b>-1.337</b> | <b>904</b> | <b>888</b> |
| <b>R Superior parietal</b>   | <b>&lt;0.001</b> | <b>-0.151</b> | <b>-0.033</b> | <b>0.008</b> | <b>-0.048</b> | <b>-0.018</b> | <b>-1.618</b> | <b>908</b> | <b>898</b> |
| L Superior temporal          | 0.009            | -0.102        | -0.024        | 0.009        | -0.043        | -0.006        | -0.945        | 802        | 824        |
| R Superior temporal          | 0.002            | -0.107        | -0.028        | 0.009        | -0.045        | -0.011        | -1.084        | 846        | 866        |
| L Supramarginal              | 0.018            | -0.093        | -0.020        | 0.008        | -0.036        | -0.003        | -0.836        | 886        | 867        |
| <b>R Supramarginal</b>       | <b>&lt;0.001</b> | <b>-0.146</b> | <b>-0.032</b> | <b>0.008</b> | <b>-0.048</b> | <b>-0.016</b> | <b>-1.340</b> | <b>898</b> | <b>888</b> |
| <b>L Temporal pole</b>       | <b>&lt;0.001</b> | <b>-0.158</b> | <b>-0.064</b> | <b>0.018</b> | <b>-0.099</b> | <b>-0.030</b> | <b>-1.811</b> | <b>890</b> | <b>886</b> |
| R Temporal pole              | 0.001            | -0.122        | -0.057        | 0.018        | -0.091        | -0.022        | -1.560        | 889        | 879        |
| L Transverse temporal        | 0.013            | -0.102        | -0.029        | 0.012        | -0.053        | -0.006        | -1.355        | 939        | 905        |
| R Transverse temporal        | 0.002            | -0.097        | -0.039        | 0.013        | -0.064        | -0.014        | -1.735        | 937        | 907        |

Results of cortical thickness analysis of HY2 stage PD vs matched healthy controls. L – Left, R – Right, ROI – region of interest, Banks STS – Banks of the superior temporal sulcus. **Boldface** denotes significant results after Bonferroni correction

### Supplementary Table 4c: Cortical thickness results – HY3 PD vs controls

| ROI Thickness      | <i>p</i>         | <i>d</i>      | <i>b</i>      | SE           | Lower CI      | Upper CI      | % diff        | NPD        | NHC        |
|--------------------|------------------|---------------|---------------|--------------|---------------|---------------|---------------|------------|------------|
| L Banks STS        | 0.007            | -0.172        | -0.047        | 0.017        | -0.081        | -0.013        | -2.077        | 227        | 459        |
| <b>R Banks STS</b> | <b>&lt;0.001</b> | <b>-0.249</b> | <b>-0.065</b> | <b>0.016</b> | <b>-0.097</b> | <b>-0.034</b> | <b>-2.737</b> | <b>239</b> | <b>481</b> |

|                                |                  |               |               |              |               |               |               |            |            |
|--------------------------------|------------------|---------------|---------------|--------------|---------------|---------------|---------------|------------|------------|
| L Caudal anterior cingulate    | 0.204            | 0.087         | 0.032         | 0.025        | -0.017        | 0.080         | 1.226         | 255        | 497        |
| R Caudal anterior cingulate    | 0.752            | -0.021        | -0.007        | 0.023        | -0.052        | 0.038         | -0.293        | 256        | 500        |
| <b>L Caudal middle frontal</b> | <b>&lt;0.001</b> | <b>-0.258</b> | <b>-0.055</b> | <b>0.014</b> | <b>-0.082</b> | <b>-0.028</b> | <b>-2.308</b> | <b>258</b> | <b>499</b> |
| R Caudal middle frontal        | 0.015            | -0.160        | -0.035        | 0.014        | -0.063        | -0.007        | -1.469        | 256        | 495        |
| L Cuneus                       | 0.039            | -0.129        | -0.026        | 0.013        | -0.052        | -0.001        | -1.521        | 223        | 475        |
| R Cuneus                       | 0.014            | -0.130        | -0.032        | 0.013        | -0.057        | -0.006        | -1.786        | 228        | 458        |
| <b>L Entorhinal</b>            | <b>&lt;0.001</b> | <b>-0.276</b> | <b>-0.118</b> | <b>0.029</b> | <b>-0.174</b> | <b>-0.062</b> | <b>-3.672</b> | <b>257</b> | <b>499</b> |
| <b>R Entorhinal</b>            | <b>&lt;0.001</b> | <b>-0.280</b> | <b>-0.159</b> | <b>0.032</b> | <b>-0.222</b> | <b>-0.097</b> | <b>-4.743</b> | <b>243</b> | <b>487</b> |
| L Frontal pole                 | 0.964            | 0.003         | 0.001         | 0.023        | -0.044        | 0.046         | 0.039         | 258        | 500        |
| R Frontal pole                 | 0.373            | -0.062        | -0.021        | 0.024        | -0.069        | 0.026         | -0.824        | 255        | 500        |
| <b>L Fusiform</b>              | <b>&lt;0.001</b> | <b>-0.372</b> | <b>-0.089</b> | <b>0.014</b> | <b>-0.117</b> | <b>-0.061</b> | <b>-3.476</b> | <b>252</b> | <b>499</b> |
| <b>R Fusiform</b>              | <b>&lt;0.001</b> | <b>-0.204</b> | <b>-0.068</b> | <b>0.018</b> | <b>-0.103</b> | <b>-0.034</b> | <b>-2.632</b> | <b>253</b> | <b>499</b> |
| <b>L Inferior parietal</b>     | <b>&lt;0.001</b> | <b>-0.359</b> | <b>-0.077</b> | <b>0.013</b> | <b>-0.103</b> | <b>-0.051</b> | <b>-3.427</b> | <b>248</b> | <b>483</b> |
| <b>R Inferior parietal</b>     | <b>&lt;0.001</b> | <b>-0.321</b> | <b>-0.076</b> | <b>0.014</b> | <b>-0.102</b> | <b>-0.049</b> | <b>-3.295</b> | <b>250</b> | <b>492</b> |
| <b>L Inferior temporal</b>     | <b>&lt;0.001</b> | <b>-0.336</b> | <b>-0.077</b> | <b>0.014</b> | <b>-0.106</b> | <b>-0.049</b> | <b>-2.928</b> | <b>232</b> | <b>481</b> |
| <b>R Inferior temporal</b>     | <b>&lt;0.001</b> | <b>-0.273</b> | <b>-0.068</b> | <b>0.014</b> | <b>-0.097</b> | <b>-0.040</b> | <b>-2.566</b> | <b>240</b> | <b>480</b> |
| L Insula                       | 0.895            | 0.009         | 0.002         | 0.016        | -0.030        | 0.034         | 0.074         | 253        | 499        |
| R Insula                       | 0.244            | -0.072        | -0.021        | 0.018        | -0.057        | 0.014         | -0.744        | 254        | 494        |
| <b>L Isthmus cingulate</b>     | <b>&lt;0.001</b> | <b>-0.283</b> | <b>-0.073</b> | <b>0.017</b> | <b>-0.107</b> | <b>-0.039</b> | <b>-3.154</b> | <b>257</b> | <b>501</b> |
| <b>R Isthmus cingulate</b>     | <b>&lt;0.001</b> | <b>-0.237</b> | <b>-0.064</b> | <b>0.017</b> | <b>-0.097</b> | <b>-0.031</b> | <b>-2.786</b> | <b>256</b> | <b>501</b> |
| <b>L Lateral occipital</b>     | <b>&lt;0.001</b> | <b>-0.220</b> | <b>-0.046</b> | <b>0.013</b> | <b>-0.071</b> | <b>-0.020</b> | <b>-2.210</b> | <b>246</b> | <b>489</b> |
| <b>R Lateral occipital</b>     | <b>&lt;0.001</b> | <b>-0.239</b> | <b>-0.055</b> | <b>0.014</b> | <b>-0.083</b> | <b>-0.026</b> | <b>-2.579</b> | <b>250</b> | <b>491</b> |
| L Lateral orbitofrontal        | 0.011            | -0.166        | -0.035        | 0.014        | -0.062        | -0.008        | -1.397        | 258        | 500        |
| R Lateral orbitofrontal        | 0.046            | -0.114        | -0.028        | 0.014        | -0.056        | -0.001        | -1.152        | 257        | 499        |
| <b>L Lingual</b>               | <b>&lt;0.001</b> | <b>-0.217</b> | <b>-0.044</b> | <b>0.012</b> | <b>-0.068</b> | <b>-0.020</b> | <b>-2.320</b> | <b>242</b> | <b>490</b> |
| R Lingual                      | 0.024            | -0.124        | -0.029        | 0.013        | -0.054        | -0.004        | -1.491        | 243        | 476        |
| L Medial orbitofrontal         | 0.937            | -0.005        | -0.001        | 0.014        | -0.029        | 0.027         | -0.048        | 254        | 496        |
| R Medial orbitofrontal         | 0.535            | 0.037         | 0.009         | 0.014        | -0.019        | 0.037         | 0.391         | 254        | 493        |
| <b>L Middle temporal</b>       | <b>&lt;0.001</b> | <b>-0.311</b> | <b>-0.078</b> | <b>0.016</b> | <b>-0.109</b> | <b>-0.048</b> | <b>-2.954</b> | <b>229</b> | <b>470</b> |
| <b>R Middle temporal</b>       | <b>&lt;0.001</b> | <b>-0.230</b> | <b>-0.060</b> | <b>0.015</b> | <b>-0.089</b> | <b>-0.031</b> | <b>-2.242</b> | <b>249</b> | <b>478</b> |
| <b>L Paracentral</b>           | <b>&lt;0.001</b> | <b>-0.211</b> | <b>-0.055</b> | <b>0.015</b> | <b>-0.085</b> | <b>-0.025</b> | <b>-2.466</b> | <b>255</b> | <b>498</b> |
| R Paracentral                  | 0.026            | -0.133        | -0.035        | 0.016        | -0.067        | -0.004        | -1.564        | 252        | 499        |
| L Parahippocampal              | 0.007            | -0.183        | -0.074        | 0.028        | -0.128        | -0.020        | -2.895        | 257        | 499        |
| <b>R Parahippocampal</b>       | <b>&lt;0.001</b> | <b>-0.298</b> | <b>-0.108</b> | <b>0.023</b> | <b>-0.154</b> | <b>-0.063</b> | <b>-4.257</b> | <b>256</b> | <b>500</b> |
| L Pars opercularis             | 0.119            | -0.095        | -0.021        | 0.013        | -0.047        | 0.005         | -0.868        | 257        | 501        |
| R Pars opercularis             | 0.106            | -0.098        | -0.022        | 0.014        | -0.049        | 0.005         | -0.924        | 257        | 501        |
| L Pars orbitalis               | 0.061            | -0.121        | -0.035        | 0.018        | -0.071        | 0.002         | -1.371        | 258        | 499        |
| R Pars orbitalis               | 0.574            | -0.036        | -0.010        | 0.018        | -0.045        | 0.025         | -0.402        | 256        | 499        |
| L Pars triangularis            | 0.006            | -0.165        | -0.037        | 0.014        | -0.064        | -0.011        | -1.663        | 258        | 501        |
| R Pars triangularis            | 0.270            | -0.065        | -0.015        | 0.014        | -0.042        | 0.012         | -0.663        | 257        | 501        |
| L Pericalcarine                | 0.607            | -0.031        | -0.007        | 0.013        | -0.032        | 0.019         | -0.436        | 217        | 473        |
| R Pericalcarine                | 0.073            | -0.094        | -0.024        | 0.013        | -0.051        | 0.002         | -1.546        | 220        | 451        |
| L Postcentral                  | 0.186            | -0.077        | -0.016        | 0.012        | -0.039        | 0.008         | -0.810        | 246        | 481        |
| R Postcentral                  | 0.012            | -0.142        | -0.030        | 0.012        | -0.053        | -0.006        | -1.553        | 243        | 481        |
| L Posterior cingulate          | 0.145            | -0.094        | -0.021        | 0.015        | -0.050        | 0.007         | -0.907        | 257        | 500        |
| <b>R Posterior cingulate</b>   | <b>&lt;0.001</b> | <b>-0.256</b> | <b>-0.064</b> | <b>0.015</b> | <b>-0.094</b> | <b>-0.034</b> | <b>-2.738</b> | <b>257</b> | <b>501</b> |
| <b>L Precentral</b>            | <b>&lt;0.001</b> | <b>-0.244</b> | <b>-0.060</b> | <b>0.015</b> | <b>-0.088</b> | <b>-0.031</b> | <b>-2.522</b> | <b>245</b> | <b>480</b> |

|                              |                  |               |               |              |               |               |               |            |            |
|------------------------------|------------------|---------------|---------------|--------------|---------------|---------------|---------------|------------|------------|
| R Precentral                 | <0.001           | -0.202        | -0.051        | 0.015        | -0.081        | -0.021        | -2.194        | 246        | 477        |
| <b>L Precuneus</b>           | <b>&lt;0.001</b> | <b>-0.267</b> | <b>-0.059</b> | <b>0.013</b> | <b>-0.085</b> | <b>-0.034</b> | <b>-2.701</b> | <b>255</b> | <b>501</b> |
| <b>R Precuneus</b>           | <b>&lt;0.001</b> | <b>-0.326</b> | <b>-0.072</b> | <b>0.013</b> | <b>-0.097</b> | <b>-0.047</b> | <b>-3.242</b> | <b>256</b> | <b>501</b> |
| L Rostral anterior cingulate | 0.275            | 0.075         | 0.023         | 0.021        | -0.018        | 0.064         | 0.838         | 255        | 494        |
| R Rostral anterior cingulate | 0.025            | 0.137         | 0.048         | 0.021        | 0.006         | 0.090         | 1.779         | 253        | 492        |
| L Rostral middle frontal     | 0.018            | -0.141        | -0.029        | 0.012        | -0.052        | -0.005        | -1.282        | 256        | 499        |
| R Rostral middle frontal     | 0.822            | -0.012        | -0.003        | 0.013        | -0.029        | 0.023         | -0.135        | 257        | 498        |
| L Superior frontal           | 0.001            | -0.206        | -0.042        | 0.013        | -0.068        | -0.017        | -1.674        | 251        | 494        |
| <b>R Superior frontal</b>    | <b>&lt;0.001</b> | <b>-0.220</b> | <b>-0.047</b> | <b>0.013</b> | <b>-0.073</b> | <b>-0.022</b> | <b>-1.887</b> | <b>250</b> | <b>495</b> |
| <b>L Superior parietal</b>   | <b>&lt;0.001</b> | <b>-0.226</b> | <b>-0.050</b> | <b>0.013</b> | <b>-0.076</b> | <b>-0.025</b> | <b>-2.463</b> | <b>242</b> | <b>495</b> |
| <b>R Superior parietal</b>   | <b>&lt;0.001</b> | <b>-0.261</b> | <b>-0.064</b> | <b>0.013</b> | <b>-0.089</b> | <b>-0.038</b> | <b>-3.109</b> | <b>245</b> | <b>496</b> |
| <b>L Superior temporal</b>   | <b>&lt;0.001</b> | <b>-0.304</b> | <b>-0.073</b> | <b>0.015</b> | <b>-0.103</b> | <b>-0.043</b> | <b>-2.854</b> | <b>210</b> | <b>454</b> |
| <b>R Superior temporal</b>   | <b>&lt;0.001</b> | <b>-0.191</b> | <b>-0.054</b> | <b>0.015</b> | <b>-0.083</b> | <b>-0.024</b> | <b>-2.099</b> | <b>237</b> | <b>478</b> |
| <b>L Supramarginal</b>       | <b>&lt;0.001</b> | <b>-0.265</b> | <b>-0.057</b> | <b>0.013</b> | <b>-0.083</b> | <b>-0.031</b> | <b>-2.424</b> | <b>244</b> | <b>477</b> |
| <b>R Supramarginal</b>       | <b>&lt;0.001</b> | <b>-0.300</b> | <b>-0.068</b> | <b>0.014</b> | <b>-0.094</b> | <b>-0.041</b> | <b>-2.854</b> | <b>248</b> | <b>491</b> |
| L Temporal pole              | 0.103            | -0.117        | -0.044        | 0.027        | -0.098        | 0.009         | -1.257        | 237        | 494        |
| <b>R Temporal pole</b>       | <b>&lt;0.001</b> | <b>-0.198</b> | <b>-0.093</b> | <b>0.027</b> | <b>-0.147</b> | <b>-0.040</b> | <b>-2.573</b> | <b>240</b> | <b>487</b> |
| L Transverse temporal        | 0.003            | -0.194        | -0.061        | 0.020        | -0.100        | -0.021        | -2.808        | 258        | 501        |
| <b>R Transverse temporal</b> | <b>&lt;0.001</b> | <b>-0.167</b> | <b>-0.074</b> | <b>0.021</b> | <b>-0.116</b> | <b>-0.032</b> | <b>-3.268</b> | <b>257</b> | <b>500</b> |

Results of cortical thickness analysis of HY3 stage PD vs matched healthy controls. L – Left, R – Right, ROI – region of interest, Banks STS – Banks of the superior temporal sulcus. **Boldface** denotes significant results after Bonferroni correction

### Supplementary Table 4d: Cortical thickness results - HY4&5 PD vs controls

| ROI Thickness                  | <i>p</i>         | <i>d</i>      | <i>b</i>      | SE           | Lower CI      | Upper CI      | % diff        | NPD       | NHC        |
|--------------------------------|------------------|---------------|---------------|--------------|---------------|---------------|---------------|-----------|------------|
| <b>L Banks STS</b>             | <b>&lt;0.001</b> | <b>-0.473</b> | <b>-0.115</b> | <b>0.026</b> | <b>-0.167</b> | <b>-0.064</b> | <b>-5.154</b> | <b>75</b> | <b>301</b> |
| R Banks STS                    | <0.001           | -0.346        | -0.084        | 0.025        | -0.132        | -0.035        | -3.554        | 78        | 318        |
| L Caudal anterior cingulate    | 0.067            | 0.205         | 0.071         | 0.039        | -0.005        | 0.147         | 2.732         | 82        | 327        |
| R Caudal anterior cingulate    | 0.051            | -0.212        | -0.067        | 0.034        | -0.134        | <0.001        | -2.708        | 83        | 329        |
| <b>L Caudal middle frontal</b> | <b>&lt;0.001</b> | <b>-0.379</b> | <b>-0.076</b> | <b>0.021</b> | <b>-0.118</b> | <b>-0.035</b> | <b>-3.231</b> | <b>82</b> | <b>327</b> |
| R Caudal middle frontal        | 0.366            | -0.099        | -0.020        | 0.022        | -0.064        | 0.024         | -0.863        | 82        | 326        |
| L Cuneus                       | 0.131            | -0.145        | -0.027        | 0.018        | -0.062        | 0.008         | -1.560        | 76        | 309        |
| R Cuneus                       | 0.449            | -0.067        | -0.015        | 0.020        | -0.053        | 0.024         | -0.845        | 75        | 296        |
| <b>L Entorhinal</b>            | <b>&lt;0.001</b> | <b>-0.399</b> | <b>-0.166</b> | <b>0.044</b> | <b>-0.253</b> | <b>-0.079</b> | <b>-5.243</b> | <b>83</b> | <b>325</b> |
| <b>R Entorhinal</b>            | <b>&lt;0.001</b> | <b>-0.370</b> | <b>-0.195</b> | <b>0.047</b> | <b>-0.287</b> | <b>-0.103</b> | <b>-5.753</b> | <b>83</b> | <b>317</b> |
| L Frontal pole                 | 0.438            | -0.089        | -0.026        | 0.034        | -0.093        | 0.040         | -1.009        | 83        | 325        |
| R Frontal pole                 | <0.001           | -0.368        | -0.118        | 0.035        | -0.188        | -0.048        | -4.557        | 83        | 326        |
| <b>L Fusiform</b>              | <b>&lt;0.001</b> | <b>-0.583</b> | <b>-0.122</b> | <b>0.021</b> | <b>-0.164</b> | <b>-0.081</b> | <b>-4.834</b> | <b>83</b> | <b>328</b> |
| <b>R Fusiform</b>              | <b>&lt;0.001</b> | <b>-0.407</b> | <b>-0.127</b> | <b>0.027</b> | <b>-0.180</b> | <b>-0.074</b> | <b>-4.938</b> | <b>81</b> | <b>329</b> |
| <b>L Inferior parietal</b>     | <b>&lt;0.001</b> | <b>-0.522</b> | <b>-0.097</b> | <b>0.019</b> | <b>-0.134</b> | <b>-0.061</b> | <b>-4.355</b> | <b>80</b> | <b>312</b> |
| <b>R Inferior parietal</b>     | <b>&lt;0.001</b> | <b>-0.517</b> | <b>-0.111</b> | <b>0.021</b> | <b>-0.152</b> | <b>-0.070</b> | <b>-4.869</b> | <b>82</b> | <b>321</b> |
| <b>L Inferior temporal</b>     | <b>&lt;0.001</b> | <b>-0.474</b> | <b>-0.093</b> | <b>0.020</b> | <b>-0.133</b> | <b>-0.054</b> | <b>-3.582</b> | <b>81</b> | <b>317</b> |
| <b>R Inferior temporal</b>     | <b>&lt;0.001</b> | <b>-0.466</b> | <b>-0.102</b> | <b>0.021</b> | <b>-0.143</b> | <b>-0.061</b> | <b>-3.870</b> | <b>81</b> | <b>324</b> |
| L Insula                       | 0.027            | -0.246        | -0.057        | 0.026        | -0.107        | -0.007        | -1.969        | 83        | 327        |
| <b>R Insula</b>                | <b>&lt;0.001</b> | <b>-0.393</b> | <b>-0.112</b> | <b>0.029</b> | <b>-0.169</b> | <b>-0.055</b> | <b>-3.942</b> | <b>83</b> | <b>326</b> |
| <b>L Isthmus cingulate</b>     | <b>&lt;0.001</b> | <b>-0.427</b> | <b>-0.103</b> | <b>0.025</b> | <b>-0.153</b> | <b>-0.053</b> | <b>-4.419</b> | <b>83</b> | <b>327</b> |
| <b>R Isthmus cingulate</b>     | <b>&lt;0.001</b> | <b>-0.366</b> | <b>-0.091</b> | <b>0.025</b> | <b>-0.140</b> | <b>-0.042</b> | <b>-3.960</b> | <b>83</b> | <b>329</b> |



|                                |                  |               |               |              |               |               |               |           |            |
|--------------------------------|------------------|---------------|---------------|--------------|---------------|---------------|---------------|-----------|------------|
| L Lateral occipital            | 0.113            | -0.164        | -0.032        | 0.020        | -0.071        | 0.008         | -1.546        | 78        | 319        |
| R Lateral occipital            | 0.002            | -0.320        | -0.066        | 0.021        | -0.108        | -0.024        | -3.133        | 80        | 321        |
| <b>L Lateral orbitofrontal</b> | <b>&lt;0.001</b> | <b>-0.402</b> | <b>-0.072</b> | <b>0.019</b> | <b>-0.108</b> | <b>-0.035</b> | <b>-2.883</b> | <b>83</b> | <b>328</b> |
| <b>R Lateral orbitofrontal</b> | <b>&lt;0.001</b> | <b>-0.484</b> | <b>-0.106</b> | <b>0.020</b> | <b>-0.145</b> | <b>-0.066</b> | <b>-4.325</b> | <b>83</b> | <b>328</b> |
| L Lingual                      | 0.002            | -0.287        | -0.054        | 0.018        | -0.089        | -0.019        | -2.880        | 79        | 325        |
| R Lingual                      | 0.140            | -0.129        | -0.028        | 0.019        | -0.065        | 0.009         | -1.444        | 77        | 317        |
| L Medial orbitofrontal         | 0.016            | -0.260        | -0.051        | 0.021        | -0.093        | -0.009        | -2.209        | 83        | 326        |
| <b>R Medial orbitofrontal</b>  | <b>&lt;0.001</b> | <b>-0.366</b> | <b>-0.081</b> | <b>0.022</b> | <b>-0.124</b> | <b>-0.038</b> | <b>-3.568</b> | <b>83</b> | <b>326</b> |
| <b>L Middle temporal</b>       | <b>&lt;0.001</b> | <b>-0.484</b> | <b>-0.108</b> | <b>0.023</b> | <b>-0.154</b> | <b>-0.063</b> | <b>-4.152</b> | <b>77</b> | <b>308</b> |
| <b>R Middle temporal</b>       | <b>&lt;0.001</b> | <b>-0.461</b> | <b>-0.105</b> | <b>0.022</b> | <b>-0.148</b> | <b>-0.063</b> | <b>-3.976</b> | <b>82</b> | <b>318</b> |
| L Paracentral                  | 0.047            | -0.185        | -0.046        | 0.023        | -0.090        | -0.001        | -2.081        | 83        | 326        |
| R Paracentral                  | 0.548            | -0.058        | -0.015        | 0.025        | -0.064        | 0.034         | -0.673        | 83        | 326        |
| L Parahippocampal              | 0.001            | -0.360        | -0.131        | 0.040        | -0.210        | -0.051        | -5.137        | 82        | 327        |
| R Parahippocampal              | 0.001            | -0.351        | -0.114        | 0.035        | -0.183        | -0.045        | -4.501        | 83        | 328        |
| L Pars opercularis             | 0.002            | -0.310        | -0.061        | 0.020        | -0.099        | -0.022        | -2.583        | 83        | 327        |
| R Pars opercularis             | 0.005            | -0.300        | -0.058        | 0.020        | -0.098        | -0.018        | -2.466        | 83        | 329        |
| L Pars orbitalis               | 0.007            | -0.282        | -0.070        | 0.025        | -0.120        | -0.020        | -2.814        | 83        | 327        |
| R Pars orbitalis               | 0.013            | -0.270        | -0.069        | 0.028        | -0.124        | -0.015        | -2.801        | 82        | 328        |
| L Pars triangularis            | 0.022            | -0.237        | -0.045        | 0.020        | -0.083        | -0.007        | -2.022        | 82        | 328        |
| R Pars triangularis            | 0.462            | -0.076        | -0.015        | 0.021        | -0.056        | 0.026         | -0.687        | 83        | 329        |
| L Pericalcarine                | 0.349            | -0.090        | -0.017        | 0.018        | -0.053        | 0.019         | -1.138        | 76        | 311        |
| R Pericalcarine                | 0.953            | -0.005        | -0.001        | 0.019        | -0.038        | 0.036         | -0.072        | 71        | 294        |
| <b>L Postcentral</b>           | <b>&lt;0.001</b> | <b>-0.343</b> | <b>-0.061</b> | <b>0.017</b> | <b>-0.094</b> | <b>-0.028</b> | <b>-3.165</b> | <b>81</b> | <b>309</b> |
| R Postcentral                  | <0.001           | -0.306        | -0.056        | 0.017        | -0.088        | -0.023        | -2.935        | 81        | 314        |
| L Posterior cingulate          | 0.025            | -0.236        | -0.051        | 0.023        | -0.095        | -0.006        | -2.146        | 83        | 328        |
| <b>R Posterior cingulate</b>   | <b>&lt;0.001</b> | <b>-0.463</b> | <b>-0.107</b> | <b>0.023</b> | <b>-0.152</b> | <b>-0.062</b> | <b>-4.613</b> | <b>83</b> | <b>329</b> |
| L Precentral                   | 0.008            | -0.265        | -0.060        | 0.022        | -0.104        | -0.016        | -2.565        | 80        | 309        |
| R Precentral                   | 0.139            | -0.141        | -0.033        | 0.022        | -0.076        | 0.011         | -1.414        | 81        | 312        |
| <b>L Precuneus</b>             | <b>&lt;0.001</b> | <b>-0.421</b> | <b>-0.083</b> | <b>0.018</b> | <b>-0.119</b> | <b>-0.047</b> | <b>-3.837</b> | <b>82</b> | <b>327</b> |
| <b>R Precuneus</b>             | <b>&lt;0.001</b> | <b>-0.449</b> | <b>-0.090</b> | <b>0.019</b> | <b>-0.128</b> | <b>-0.053</b> | <b>-4.125</b> | <b>83</b> | <b>328</b> |
| L Rostral anterior cingulate   | 0.454            | -0.085        | -0.023        | 0.030        | -0.082        | 0.037         | -0.836        | 83        | 325        |
| R Rostral anterior cingulate   | 0.346            | -0.094        | -0.029        | 0.031        | -0.089        | 0.031         | -1.078        | 83        | 325        |
| L Rostral middle frontal       | 0.012            | -0.243        | -0.041        | 0.016        | -0.074        | -0.009        | -1.888        | 83        | 328        |
| R Rostral middle frontal       | 0.002            | -0.265        | -0.054        | 0.018        | -0.089        | -0.020        | -2.486        | 82        | 324        |
| L Superior frontal             | 0.046            | -0.209        | -0.039        | 0.020        | -0.078        | -0.001        | -1.561        | 81        | 322        |
| R Superior frontal             | 0.105            | -0.163        | -0.031        | 0.019        | -0.068        | 0.007         | -1.252        | 81        | 320        |
| L Superior parietal            | 0.001            | -0.305        | -0.059        | 0.018        | -0.095        | -0.023        | -2.911        | 83        | 317        |
| <b>R Superior parietal</b>     | <b>&lt;0.001</b> | <b>-0.312</b> | <b>-0.065</b> | <b>0.018</b> | <b>-0.101</b> | <b>-0.029</b> | <b>-3.194</b> | <b>83</b> | <b>321</b> |
| <b>L Superior temporal</b>     | <b>&lt;0.001</b> | <b>-0.467</b> | <b>-0.103</b> | <b>0.023</b> | <b>-0.148</b> | <b>-0.058</b> | <b>-4.102</b> | <b>76</b> | <b>297</b> |
| <b>R Superior temporal</b>     | <b>&lt;0.001</b> | <b>-0.368</b> | <b>-0.091</b> | <b>0.021</b> | <b>-0.133</b> | <b>-0.049</b> | <b>-3.624</b> | <b>79</b> | <b>312</b> |
| <b>L Supramarginal</b>         | <b>&lt;0.001</b> | <b>-0.495</b> | <b>-0.096</b> | <b>0.020</b> | <b>-0.135</b> | <b>-0.057</b> | <b>-4.155</b> | <b>83</b> | <b>311</b> |
| <b>R Supramarginal</b>         | <b>&lt;0.001</b> | <b>-0.521</b> | <b>-0.109</b> | <b>0.021</b> | <b>-0.150</b> | <b>-0.068</b> | <b>-4.656</b> | <b>82</b> | <b>320</b> |
| L Temporal pole                | 0.001            | -0.361        | -0.131        | 0.040        | -0.210        | -0.052        | -3.746        | 80        | 324        |
| <b>R Temporal pole</b>         | <b>&lt;0.001</b> | <b>-0.428</b> | <b>-0.177</b> | <b>0.040</b> | <b>-0.256</b> | <b>-0.098</b> | <b>-4.892</b> | <b>82</b> | <b>316</b> |
| <b>L Transverse temporal</b>   | <b>&lt;0.001</b> | <b>-0.367</b> | <b>-0.104</b> | <b>0.030</b> | <b>-0.162</b> | <b>-0.046</b> | <b>-4.922</b> | <b>83</b> | <b>328</b> |
| R Transverse temporal          | 0.056            | -0.153        | -0.063        | 0.033        | -0.129        | 0.002         | -2.881        | 82        | 329        |

Results of cortical thickness analysis of HY stage 4 and 5 PD vs matched healthy controls. L – Left, R – Right, ROI – region of interest, Banks STS – Banks of the superior temporal sulcus. **Boldface** denotes significant results after Bonferroni correction

**Supplementary Table 4e: Cortical surface area results - HY1 PD vs controls**

| <b>ROI Surface Area</b>     | <b>p</b>         | <b>d</b>      | <b>b</b>     | <b>SE</b>   | <b>Lower CI</b> | <b>Upper CI</b> | <b>% diff</b> | <b>NPD</b> | <b>NHC</b> |
|-----------------------------|------------------|---------------|--------------|-------------|-----------------|-----------------|---------------|------------|------------|
| L Banks STS                 | 0.942            | -0.004        | -0.68        | 9.34        | -19.00          | 17.65           | -0.07         | 383        | 776        |
| R Banks STS                 | 0.441            | 0.043         | 6.00         | 7.78        | -9.27           | 21.26           | 0.66          | 417        | 813        |
| L Caudal anterior cingulate | 0.352            | 0.053         | 7.04         | 7.56        | -7.80           | 21.87           | 1.13          | 432        | 839        |
| R Caudal anterior cingulate | 0.562            | 0.033         | 5.16         | 8.91        | -12.31          | 22.63           | 0.68          | 430        | 842        |
| L Caudal middle frontal     | 0.178            | 0.076         | 25.80        | 19.14       | -11.75          | 63.34           | 1.17          | 429        | 838        |
| R Caudal middle frontal     | 0.665            | 0.025         | 8.44         | 19.50       | -29.81          | 46.69           | 0.41          | 430        | 839        |
| L Cuneus                    | 0.074            | -0.106        | -22.06       | 12.32       | -46.23          | 2.11            | -1.52         | 404        | 802        |
| R Cuneus                    | 0.009            | -0.155        | -32.27       | 12.35       | -56.50          | -8.03           | -2.14         | 400        | 770        |
| L Entorhinal                | 0.411            | -0.048        | -4.17        | 5.07        | -14.13          | 5.78            | -1.01         | 425        | 836        |
| R Entorhinal                | 0.014            | -0.141        | -11.02       | 4.49        | -19.82          | -2.21           | -3.09         | 419        | 823        |
| <b>L Frontal pole</b>       | <b>&lt;0.001</b> | <b>-0.219</b> | <b>-8.25</b> | <b>1.98</b> | <b>-12.12</b>   | <b>-4.37</b>    | <b>-3.93</b>  | <b>428</b> | <b>842</b> |
| R Frontal pole              | 0.001            | -0.169        | -7.94        | 2.48        | -12.81          | -3.07           | -2.87         | 429        | 843        |
| L Fusiform                  | 0.344            | 0.054         | 19.69        | 20.81       | -21.15          | 60.52           | 0.63          | 425        | 841        |
| R Fusiform                  | 0.922            | 0.005         | 2.02         | 20.50       | -38.21          | 42.24           | 0.07          | 430        | 842        |
| L Inferior parietal         | 0.607            | -0.029        | -16.47       | 32.01       | -79.28          | 46.34           | -0.37         | 426        | 814        |
| R Inferior parietal         | 0.174            | 0.076         | 51.64        | 37.93       | -22.78          | 126.07          | 0.99          | 421        | 830        |
| L Inferior temporal         | 0.603            | 0.029         | 13.16        | 25.34       | -36.55          | 62.87           | 0.41          | 409        | 803        |
| R Inferior temporal         | 0.877            | -0.009        | -3.61        | 23.28       | -49.28          | 42.06           | -0.12         | 423        | 811        |
| L Insula                    | 0.914            | -0.006        | -1.37        | 12.69       | -26.27          | 23.54           | -0.06         | 430        | 832        |
| R Insula                    | 0.648            | -0.025        | -6.52        | 14.29       | -34.56          | 21.52           | -0.29         | 429        | 829        |
| L Isthmus cingulate         | 0.102            | 0.091         | 15.34        | 9.38        | -3.07           | 33.74           | 1.54          | 433        | 841        |
| R Isthmus cingulate         | 0.189            | 0.072         | 11.21        | 8.53        | -5.52           | 27.94           | 1.22          | 432        | 843        |
| L Lateral occipital         | 0.496            | -0.038        | -22.32       | 32.78       | -86.63          | 41.99           | -0.47         | 421        | 827        |
| R Lateral occipital         | 0.164            | -0.078        | -45.95       | 33.02       | -110.73         | 18.84           | -1.00         | 426        | 830        |
| L Lateral orbitofrontal     | 0.530            | 0.035         | 9.22         | 14.69       | -19.60          | 38.04           | 0.37          | 426        | 840        |
| R Lateral orbitofrontal     | 0.032            | 0.117         | 34.39        | 16.05       | 2.90            | 65.88           | 1.39          | 428        | 841        |
| L Lingual                   | 0.320            | 0.056         | 23.46        | 23.60       | -22.84          | 69.75           | 0.78          | 426        | 826        |
| R Lingual                   | 0.693            | -0.023        | -9.31        | 23.57       | -55.54          | 36.93           | -0.31         | 418        | 801        |
| L Medial orbitofrontal      | 0.958            | 0.003         | 0.64         | 12.20       | -23.30          | 24.59           | 0.04          | 425        | 830        |
| R Medial orbitofrontal      | 0.708            | -0.020        | -3.91        | 10.43       | -24.38          | 16.56           | -0.22         | 425        | 833        |
| L Middle temporal           | 0.100            | -0.095        | -35.15       | 21.35       | -77.03          | 6.74            | -1.18         | 386        | 782        |
| R Middle temporal           | 0.744            | -0.019        | -6.89        | 21.07       | -48.23          | 34.45           | -0.21         | 417        | 812        |
| L Paracentral               | 0.241            | 0.066         | 12.18        | 10.38       | -8.19           | 32.54           | 0.92          | 432        | 840        |
| R Paracentral               | 0.218            | 0.068         | 13.73        | 11.14       | -8.13           | 35.58           | 0.91          | 431        | 844        |
| L Parahippocampal           | 0.173            | 0.078         | 8.05         | 5.91        | -3.54           | 19.63           | 1.19          | 431        | 842        |
| R Parahippocampal           | 0.079            | 0.099         | 8.67         | 4.93        | -1.01           | 18.35           | 1.33          | 430        | 844        |
| L Pars opercularis          | 0.865            | -0.010        | -2.41        | 14.15       | -30.17          | 25.34           | -0.15         | 435        | 842        |
| R Pars opercularis          | 0.071            | 0.105         | 22.64        | 12.53       | -1.95           | 47.22           | 1.68          | 433        | 842        |
| L Pars orbitalis            | 0.774            | -0.016        | -1.23        | 4.30        | -9.66           | 7.19            | -0.20         | 425        | 841        |
| R Pars orbitalis            | 0.459            | 0.042         | 4.09         | 5.52        | -6.74           | 14.93           | 0.55          | 427        | 842        |
| L Pars triangularis         | 0.729            | 0.020         | 3.57         | 10.29       | -16.61          | 23.76           | 0.29          | 425        | 843        |
| R Pars triangularis         | 0.425            | 0.046         | 10.38        | 13.01       | -15.14          | 35.89           | 0.72          | 427        | 844        |
| L Pericalcarine             | 0.551            | -0.035        | -8.25        | 13.83       | -35.39          | 18.89           | -0.60         | 411        | 798        |
| R Pericalcarine             | 0.881            | -0.009        | -2.25        | 15.06       | -31.80          | 27.30           | -0.15         | 395        | 753        |
| L Postcentral               | 0.709            | 0.021         | 9.05         | 24.23       | -38.49          | 56.58           | 0.22          | 404        | 815        |

|                              |       |        |        |       |        |       |       |     |     |
|------------------------------|-------|--------|--------|-------|--------|-------|-------|-----|-----|
| R Postcentral                | 0.111 | -0.090 | -37.99 | 23.84 | -84.76 | 8.78  | -0.97 | 409 | 818 |
| L Posterior cingulate        | 0.217 | 0.070  | 12.48  | 10.10 | -7.34  | 32.31 | 1.10  | 434 | 839 |
| R Posterior cingulate        | 0.337 | 0.053  | 9.70   | 10.10 | -10.12 | 29.51 | 0.84  | 435 | 843 |
| L Precentral                 | 0.819 | -0.013 | -6.04  | 26.39 | -57.82 | 45.75 | -0.13 | 412 | 812 |
| R Precentral                 | 0.683 | 0.023  | 10.98  | 26.90 | -41.80 | 63.76 | 0.23  | 421 | 816 |
| L Precuneus                  | 0.222 | -0.067 | -28.64 | 23.46 | -74.66 | 17.39 | -0.78 | 431 | 842 |
| R Precuneus                  | 0.784 | -0.015 | -6.83  | 24.86 | -55.61 | 41.95 | -0.18 | 431 | 842 |
| L Rostral anterior cingulate | 0.989 | 0.001  | 0.12   | 8.42  | -16.41 | 16.64 | 0.01  | 425 | 813 |
| R Rostral anterior cingulate | 0.535 | 0.034  | 4.71   | 7.60  | -10.20 | 19.63 | 0.71  | 428 | 831 |
| L Rostral middle frontal     | 0.728 | 0.019  | 12.19  | 35.00 | -56.48 | 80.86 | 0.22  | 424 | 842 |
| R Rostral middle frontal     | 0.768 | -0.016 | -11.46 | 38.84 | -87.67 | 64.75 | -0.20 | 427 | 842 |
| L Superior frontal           | 0.793 | 0.014  | 10.10  | 38.48 | -65.39 | 85.58 | 0.15  | 423 | 826 |
| R Superior frontal           | 0.493 | 0.038  | 25.77  | 37.56 | -47.92 | 99.46 | 0.38  | 423 | 838 |
| L Superior parietal          | 0.987 | -0.001 | -0.56  | 34.19 | -67.63 | 66.51 | -0.01 | 416 | 826 |
| R Superior parietal          | 0.957 | 0.003  | 1.82   | 34.05 | -64.99 | 68.62 | 0.03  | 426 | 836 |
| L Superior temporal          | 0.393 | -0.050 | -19.17 | 22.44 | -63.19 | 24.86 | -0.52 | 378 | 762 |
| R Superior temporal          | 0.810 | 0.014  | 4.65   | 19.30 | -33.23 | 42.53 | 0.13  | 404 | 801 |
| L Supramarginal              | 0.259 | 0.065  | 34.26  | 30.34 | -25.27 | 93.79 | 0.91  | 412 | 807 |
| R Supramarginal              | 0.873 | 0.009  | 4.33   | 27.17 | -48.97 | 57.63 | 0.12  | 420 | 828 |
| L Temporal pole              | 0.278 | -0.059 | -3.76  | 3.47  | -10.56 | 3.04  | -0.79 | 413 | 829 |
| R Temporal pole              | 0.446 | -0.043 | -2.78  | 3.65  | -9.94  | 4.37  | -0.66 | 416 | 819 |
| L Transverse temporal        | 0.271 | 0.061  | 4.76   | 4.32  | -3.72  | 13.25 | 1.05  | 434 | 844 |
| R Transverse temporal        | 0.529 | 0.036  | 1.89   | 3.00  | -4.00  | 7.79  | 0.57  | 435 | 846 |

Results of cortical surface area analysis of HY stage 1 PD vs matched healthy controls. L – Left, R – Right, ROI – region of interest, Banks STS – Banks of the superior temporal sulcus. **Boldface** denotes significant results after Bonferroni correction

### Supplementary Table 4f: Cortical surface area results - HY2 PD vs controls

| ROI Surface Area            | <i>p</i> | <i>d</i> | <i>b</i> | SE    | Lower CI | Upper CI | % diff | NPD | NHC |
|-----------------------------|----------|----------|----------|-------|----------|----------|--------|-----|-----|
| L Banks STS                 | 0.260    | 0.052    | 8.76     | 7.77  | -6.48    | 24.00    | 0.88   | 817 | 821 |
| R Banks STS                 | 0.070    | 0.080    | 12.04    | 6.64  | -0.98    | 25.06    | 1.33   | 888 | 874 |
| L Caudal anterior cingulate | 0.080    | 0.079    | 11.20    | 6.40  | -1.36    | 23.76    | 1.80   | 928 | 900 |
| R Caudal anterior cingulate | 0.858    | -0.008   | -1.33    | 7.46  | -15.97   | 13.31    | -0.18  | 924 | 905 |
| L Caudal middle frontal     | 0.615    | -0.022   | -7.93    | 15.76 | -38.84   | 22.98    | -0.36  | 932 | 897 |
| R Caudal middle frontal     | 0.457    | -0.034   | -12.20   | 16.40 | -44.37   | 19.96    | -0.59  | 930 | 897 |
| L Cuneus                    | 0.001    | -0.156   | -33.62   | 9.98  | -53.19   | -14.05   | -2.32  | 871 | 861 |
| R Cuneus                    | 0.002    | -0.146   | -31.86   | 10.25 | -51.96   | -11.77   | -2.13  | 838 | 826 |
| L Entorhinal                | 0.644    | 0.021    | 1.96     | 4.25  | -6.36    | 10.29    | 0.48   | 912 | 898 |
| R Entorhinal                | 0.665    | -0.020   | -1.69    | 3.91  | -9.36    | 5.97     | -0.48  | 881 | 881 |
| L Frontal pole              | 0.003    | -0.121   | -4.92    | 1.65  | -8.15    | -1.69    | -2.37  | 934 | 902 |
| R Frontal pole              | 0.979    | 0.001    | 0.05     | 2.05  | -3.97    | 4.07     | 0.02   | 933 | 905 |
| L Fusiform                  | 0.263    | -0.049   | -19.80   | 17.68 | -54.48   | 14.88    | -0.64  | 921 | 901 |
| R Fusiform                  | 0.076    | -0.077   | -31.43   | 17.70 | -66.14   | 3.28     | -1.03  | 929 | 903 |
| L Inferior parietal         | 0.624    | -0.022   | -13.16   | 26.83 | -65.79   | 39.47    | -0.29  | 899 | 874 |
| R Inferior parietal         | 0.561    | -0.026   | -17.65   | 30.37 | -77.21   | 41.91    | -0.34  | 902 | 890 |
| L Inferior temporal         | 0.303    | -0.045   | -21.24   | 20.63 | -61.70   | 19.21    | -0.67  | 907 | 864 |

|                              |                  |               |               |              |                |               |              |            |            |
|------------------------------|------------------|---------------|---------------|--------------|----------------|---------------|--------------|------------|------------|
| R Inferior temporal          | 0.492            | -0.030        | -13.52        | 19.69        | -52.13         | 25.09         | -0.44        | 910        | 875        |
| L Insula                     | 0.590            | 0.022         | 5.64          | 10.46        | -14.87         | 26.14         | 0.26         | 934        | 896        |
| R Insula                     | 0.737            | -0.014        | -4.13         | 12.32        | -28.29         | 20.02         | -0.18        | 926        | 892        |
| L Isthmus cingulate          | 0.578            | 0.024         | 4.33          | 7.78         | -10.93         | 19.59         | 0.43         | 934        | 903        |
| R Isthmus cingulate          | 0.428            | 0.034         | 5.43          | 6.85         | -8.01          | 18.87         | 0.58         | 928        | 906        |
| L Lateral occipital          | 0.001            | -0.148        | -94.35        | 27.52        | -148.32        | -40.39        | -1.99        | 921        | 883        |
| R Lateral occipital          | 0.003            | -0.129        | -81.27        | 27.78        | -135.76        | -26.78        | -1.76        | 917        | 889        |
| L Lateral orbitofrontal      | 0.071            | -0.079        | -22.71        | 12.57        | -47.36         | 1.93          | -0.90        | 935        | 900        |
| R Lateral orbitofrontal      | 0.895            | -0.006        | -1.80         | 13.63        | -28.53         | 24.93         | -0.07        | 930        | 902        |
| <b>L Lingual</b>             | <b>0.001</b>     | <b>-0.154</b> | <b>-69.27</b> | <b>19.93</b> | <b>-108.35</b> | <b>-30.18</b> | <b>-2.32</b> | <b>903</b> | <b>889</b> |
| <b>R Lingual</b>             | <b>&lt;0.001</b> | <b>-0.175</b> | <b>-77.65</b> | <b>19.84</b> | <b>-116.57</b> | <b>-38.74</b> | <b>-2.57</b> | <b>883</b> | <b>858</b> |
| L Medial orbitofrontal       | 0.548            | -0.026        | -6.20         | 10.33        | -26.47         | 14.06         | -0.34        | 924        | 892        |
| R Medial orbitofrontal       | 0.232            | -0.052        | -10.75        | 9.00         | -28.41         | 6.90          | -0.60        | 920        | 895        |
| L Middle temporal            | 0.064            | -0.084        | -33.40        | 18.04        | -68.79         | 1.98          | -1.12        | 854        | 837        |
| R Middle temporal            | 0.704            | -0.017        | -6.90         | 18.18        | -42.56         | 28.76         | -0.21        | 901        | 874        |
| L Paracentral                | 0.084            | 0.078         | 14.94         | 8.64         | -2.00          | 31.89         | 1.12         | 928        | 901        |
| R Paracentral                | 0.215            | 0.055         | 12.06         | 9.72         | -6.99          | 31.12         | 0.80         | 923        | 903        |
| L Parahippocampal            | 0.197            | 0.055         | 6.31          | 4.89         | -3.27          | 15.90         | 0.93         | 936        | 903        |
| R Parahippocampal            | 0.202            | 0.056         | 5.96          | 4.67         | -3.20          | 15.12         | 0.91         | 924        | 905        |
| L Pars opercularis           | 0.806            | -0.011        | -2.79         | 11.32        | -25.00         | 19.42         | -0.18        | 935        | 903        |
| R Pars opercularis           | 0.319            | -0.045        | -9.81         | 9.84         | -29.11         | 9.49          | -0.73        | 933        | 902        |
| L Pars orbitalis             | 0.088            | -0.074        | -6.34         | 3.72         | -13.64         | 0.95          | -1.03        | 930        | 903        |
| R Pars orbitalis             | 0.388            | 0.038         | 4.08          | 4.72         | -5.18          | 13.34         | 0.54         | 930        | 904        |
| L Pars triangularis          | 0.591            | -0.024        | -4.82         | 8.97         | -22.41         | 12.78         | -0.39        | 935        | 904        |
| R Pars triangularis          | 0.316            | -0.045        | -10.88        | 10.84        | -32.13         | 10.38         | -0.76        | 927        | 904        |
| L Pericalcarine              | 0.001            | -0.147        | -36.57        | 11.49        | -59.10         | -14.03        | -2.70        | 864        | 862        |
| <b>R Pericalcarine</b>       | <b>&lt;0.001</b> | <b>-0.168</b> | <b>-44.85</b> | <b>12.40</b> | <b>-69.18</b>  | <b>-20.53</b> | <b>-3.03</b> | <b>827</b> | <b>807</b> |
| L Postcentral                | 0.294            | 0.047         | 21.60         | 20.60        | -18.80         | 62.01         | 0.53         | 890        | 866        |
| R Postcentral                | 0.390            | 0.039         | 17.46         | 20.32        | -22.39         | 57.31         | 0.44         | 883        | 873        |
| L Posterior cingulate        | 0.634            | 0.021         | 4.34          | 9.10         | -13.52         | 22.20         | 0.38         | 937        | 902        |
| R Posterior cingulate        | 0.681            | 0.018         | 3.39          | 8.23         | -12.75         | 19.53         | 0.29         | 933        | 904        |
| L Precentral                 | 0.702            | 0.017         | 8.42          | 22.03        | -34.79         | 51.63         | 0.17         | 896        | 860        |
| R Precentral                 | 0.151            | 0.063         | 32.66         | 22.72        | -11.91         | 77.23         | 0.68         | 896        | 869        |
| L Precuneus                  | 0.171            | -0.059        | -27.24        | 19.91        | -66.30         | 11.81         | -0.74        | 934        | 904        |
| R Precuneus                  | 0.772            | 0.012         | 6.04          | 20.87        | -34.89         | 46.96         | 0.16         | 930        | 904        |
| L Rostral anterior cingulate | 0.685            | 0.018         | 2.99          | 7.38         | -11.48         | 17.47         | 0.37         | 918        | 880        |
| R Rostral anterior cingulate | 0.525            | -0.027        | -4.09         | 6.44         | -16.71         | 8.53          | -0.61        | 921        | 894        |
| L Rostral middle frontal     | 0.033            | -0.092        | -66.31        | 31.11        | -127.33        | -5.29         | -1.22        | 924        | 902        |
| R Rostral middle frontal     | 0.042            | -0.088        | -65.22        | 32.02        | -128.02        | -2.42         | -1.16        | 931        | 901        |
| L Superior frontal           | 0.013            | -0.106        | -83.00        | 33.52        | -148.73        | -17.26        | -1.19        | 910        | 886        |
| R Superior frontal           | 0.236            | -0.052        | -39.64        | 33.46        | -105.27        | 25.98         | -0.59        | 910        | 893        |
| L Superior parietal          | 0.009            | -0.117        | -74.87        | 28.56        | -130.89        | -18.85        | -1.41        | 904        | 888        |
| R Superior parietal          | 0.105            | -0.072        | -45.76        | 28.24        | -101.14        | 9.63          | -0.86        | 906        | 897        |
| L Superior temporal          | 0.427            | -0.037        | -15.76        | 19.85        | -54.69         | 23.17         | -0.43        | 800        | 816        |
| R Superior temporal          | 0.268            | 0.049         | 18.41         | 16.62        | -14.19         | 51.01         | 0.53         | 846        | 866        |

|                       |       |        |       |       |        |       |       |     |     |
|-----------------------|-------|--------|-------|-------|--------|-------|-------|-----|-----|
| L Supramarginal       | 0.720 | 0.016  | 8.97  | 25.03 | -40.12 | 58.06 | 0.24  | 887 | 865 |
| R Supramarginal       | 0.285 | 0.047  | 24.45 | 22.88 | -20.42 | 69.32 | 0.68  | 900 | 890 |
| L Temporal pole       | 0.162 | -0.061 | -4.18 | 2.99  | -10.05 | 1.68  | -0.88 | 891 | 886 |
| R Temporal pole       | 0.232 | -0.054 | -3.74 | 3.13  | -9.88  | 2.39  | -0.88 | 888 | 879 |
| L Transverse temporal | 0.172 | 0.060  | 4.91  | 3.59  | -2.13  | 11.95 | 1.10  | 940 | 905 |
| R Transverse temporal | 0.578 | 0.024  | 1.45  | 2.60  | -3.66  | 6.55  | 0.43  | 936 | 907 |

Results of cortical surface area analysis of HY stage 2 PD vs matched healthy controls. L – Left, R – Right, ROI – region of interest, Banks STS – Banks of the superior temporal sulcus. **Boldface** denotes significant results after Bonferroni correction

## Supplementary Table 4g: Cortical surface area results - HY3 PD vs controls

| ROI Surface Area            | <i>p</i>         | <i>d</i>      | <i>b</i>       | SE           | Lower CI       | Upper CI       | % diff       | NPD        | NHC        |
|-----------------------------|------------------|---------------|----------------|--------------|----------------|----------------|--------------|------------|------------|
| L Banks STS                 | 0.017            | -0.177        | -31.00         | 12.91        | -56.36         | -5.64          | -3.14        | 228        | 453        |
| R Banks STS                 | 0.048            | -0.144        | -22.30         | 11.25        | -44.39         | -0.20          | -2.45        | 238        | 482        |
| L Caudal anterior cingulate | 0.170            | -0.103        | -14.59         | 10.61        | -35.43         | 6.25           | -2.34        | 256        | 497        |
| R Caudal anterior cingulate | 0.417            | -0.059        | -10.04         | 12.37        | -34.32         | 14.25          | -1.34        | 256        | 499        |
| L Caudal middle frontal     | 0.011            | -0.184        | -69.33         | 27.20        | -122.73        | -15.93         | -3.13        | 257        | 499        |
| R Caudal middle frontal     | 0.058            | -0.142        | -53.97         | 28.43        | -109.78        | 1.84           | -2.61        | 255        | 495        |
| L Cuneus                    | 0.003            | -0.234        | -50.80         | 17.09        | -84.35         | -17.24         | -3.53        | 223        | 471        |
| <b>R Cuneus</b>             | <b>&lt;0.001</b> | <b>-0.271</b> | <b>-62.06</b>  | <b>17.61</b> | <b>-96.64</b>  | <b>-27.49</b>  | <b>-4.16</b> | <b>228</b> | <b>448</b> |
| L Entorhinal                | 0.232            | -0.090        | -8.36          | 6.98         | -22.06         | 5.35           | -2.01        | 256        | 497        |
| R Entorhinal                | 0.442            | -0.059        | -4.95          | 6.43         | -17.58         | 7.67           | -1.38        | 243        | 486        |
| <b>L Frontal pole</b>       | <b>&lt;0.001</b> | <b>-0.291</b> | <b>-12.22</b>  | <b>2.72</b>  | <b>-17.56</b>  | <b>-6.88</b>   | <b>-5.82</b> | <b>258</b> | <b>500</b> |
| R Frontal pole              | 0.233            | -0.079        | -4.27          | 3.57         | -11.28         | 2.75           | -1.55        | 257        | 500        |
| <b>L Fusiform</b>           | <b>&lt;0.001</b> | <b>-0.260</b> | <b>-105.68</b> | <b>29.16</b> | <b>-162.94</b> | <b>-48.43</b>  | <b>-3.40</b> | <b>252</b> | <b>499</b> |
| R Fusiform                  | 0.004            | -0.207        | -86.45         | 29.73        | -144.82        | -28.08         | -2.85        | 252        | 499        |
| L Inferior parietal         | 0.005            | -0.208        | -132.53        | 47.16        | -225.13        | -39.93         | -2.99        | 247        | 482        |
| R Inferior parietal         | 0.007            | -0.197        | -149.07        | 55.23        | -257.51        | -40.63         | -2.83        | 250        | 492        |
| <b>L Inferior temporal</b>  | <b>&lt;0.001</b> | <b>-0.260</b> | <b>-127.58</b> | <b>36.53</b> | <b>-199.30</b> | <b>-55.86</b>  | <b>-3.96</b> | <b>232</b> | <b>478</b> |
| <b>R Inferior temporal</b>  | <b>&lt;0.001</b> | <b>-0.270</b> | <b>-122.26</b> | <b>33.71</b> | <b>-188.44</b> | <b>-56.07</b>  | <b>-4.00</b> | <b>240</b> | <b>480</b> |
| L Insula                    | 0.385            | -0.060        | -16.77         | 19.28        | -54.62         | 21.08          | -0.76        | 253        | 495        |
| R Insula                    | 0.024            | -0.160        | -49.43         | 21.87        | -92.37         | -6.49          | -2.16        | 254        | 490        |
| L Isthmus cingulate         | 0.682            | -0.029        | -5.33          | 13.02        | -30.89         | 20.23          | -0.53        | 258        | 499        |
| R Isthmus cingulate         | 0.531            | 0.042         | 7.08           | 11.29        | -15.08         | 29.24          | 0.76         | 255        | 500        |
| <b>L Lateral occipital</b>  | <b>&lt;0.001</b> | <b>-0.324</b> | <b>-211.56</b> | <b>46.95</b> | <b>-303.75</b> | <b>-119.38</b> | <b>-4.49</b> | <b>246</b> | <b>489</b> |
| <b>R Lateral occipital</b>  | <b>&lt;0.001</b> | <b>-0.286</b> | <b>-192.27</b> | <b>49.49</b> | <b>-289.44</b> | <b>-95.09</b>  | <b>-4.18</b> | <b>250</b> | <b>490</b> |
| L Lateral orbitofrontal     | 0.028            | -0.160        | -47.78         | 21.71        | -90.40         | -5.16          | -1.89        | 258        | 500        |
| R Lateral orbitofrontal     | 0.100            | -0.118        | -39.07         | 23.74        | -85.67         | 7.53           | -1.58        | 256        | 500        |
| <b>L Lingual</b>            | <b>&lt;0.001</b> | <b>-0.253</b> | <b>-116.79</b> | <b>33.75</b> | <b>-183.06</b> | <b>-50.52</b>  | <b>-3.98</b> | <b>241</b> | <b>488</b> |
| <b>R Lingual</b>            | <b>&lt;0.001</b> | <b>-0.294</b> | <b>-133.57</b> | <b>33.37</b> | <b>-199.09</b> | <b>-68.05</b>  | <b>-4.48</b> | <b>243</b> | <b>473</b> |
| L Medial orbitofrontal      | 0.002            | -0.222        | -52.67         | 17.06        | -86.17         | -19.17         | -2.89        | 254        | 493        |
| R Medial orbitofrontal      | 0.012            | -0.182        | -39.49         | 15.67        | -70.26         | -8.73          | -2.19        | 254        | 491        |
| <b>L Middle temporal</b>    | <b>&lt;0.001</b> | <b>-0.300</b> | <b>-132.48</b> | <b>32.79</b> | <b>-196.86</b> | <b>-68.09</b>  | <b>-4.43</b> | <b>229</b> | <b>464</b> |
| <b>R Middle temporal</b>    | <b>&lt;0.001</b> | <b>-0.353</b> | <b>-154.36</b> | <b>31.01</b> | <b>-215.25</b> | <b>-93.47</b>  | <b>-4.72</b> | <b>249</b> | <b>478</b> |
| L Paracentral               | 0.567            | 0.042         | 8.65           | 15.11        | -21.01         | 38.31          | 0.65         | 253        | 497        |
| R Paracentral               | 0.968            | -0.003        | -0.68          | 17.09        | -34.22         | 32.87          | -0.04        | 252        | 499        |
| L Parahippocampal           | 0.010            | -0.190        | -22.07         | 8.57         | -38.88         | -5.25          | -3.28        | 257        | 499        |
| R Parahippocampal           | 0.076            | -0.130        | -12.76         | 7.17         | -26.84         | 1.32           | -1.96        | 255        | 500        |

|                                 |                  |               |                |              |                |                |              |            |            |
|---------------------------------|------------------|---------------|----------------|--------------|----------------|----------------|--------------|------------|------------|
| L Pars opercularis              | 0.021            | -0.172        | -44.80         | 19.30        | -82.70         | -6.90          | -2.83        | 257        | 500        |
| R Pars opercularis              | 0.156            | -0.104        | -23.15         | 16.30        | -55.17         | 8.86           | -1.74        | 257        | 499        |
| L Pars orbitalis                | 0.017            | -0.171        | -15.16         | 6.33         | -27.60         | -2.73          | -2.45        | 258        | 499        |
| R Pars orbitalis                | 0.007            | -0.195        | -20.91         | 7.77         | -36.16         | -5.66          | -2.80        | 256        | 499        |
| L Pars triangularis             | 0.358            | -0.068        | -13.85         | 15.05        | -43.40         | 15.71          | -1.12        | 258        | 500        |
| R Pars triangularis             | 0.261            | -0.083        | -20.29         | 18.05        | -55.73         | 15.15          | -1.43        | 257        | 499        |
| L Pericalcarine                 | 0.037            | -0.166        | -47.25         | 22.61        | -91.64         | -2.86          | -3.53        | 217        | 467        |
| R Pericalcarine                 | 0.054            | -0.147        | -41.53         | 21.53        | -83.81         | 0.75           | -2.85        | 220        | 440        |
| L Postcentral                   | 0.009            | -0.197        | -89.95         | 34.16        | -157.02        | -22.87         | -2.18        | 246        | 482        |
| R Postcentral                   | 0.029            | -0.165        | -76.55         | 34.94        | -145.15        | -7.96          | -1.92        | 243        | 483        |
| L Posterior cingulate           | 0.085            | -0.125        | -23.31         | 13.52        | -49.85         | 3.22           | -2.06        | 256        | 498        |
| R Posterior cingulate           | 0.226            | -0.085        | -17.05         | 14.06        | -44.65         | 10.56          | -1.47        | 257        | 499        |
| L Precentral                    | 0.096            | -0.123        | -68.34         | 40.98        | -148.80        | 12.12          | -1.41        | 245        | 480        |
| R Precentral                    | 0.037            | -0.155        | -80.48         | 38.49        | -156.06        | -4.91          | -1.66        | 246        | 480        |
| <b>L Precuneus</b>              | <b>&lt;0.001</b> | <b>-0.284</b> | <b>-135.45</b> | <b>33.52</b> | <b>-201.27</b> | <b>-69.64</b>  | <b>-3.67</b> | <b>256</b> | <b>499</b> |
| R Precuneus                     | 0.001            | -0.228        | -108.97        | 33.77        | -175.27        | -42.67         | -2.84        | 256        | 499        |
| L Rostral anterior cingulate    | 0.571            | 0.042         | 7.17           | 12.65        | -17.67         | 32.00          | 0.87         | 255        | 482        |
| R Rostral anterior cingulate    | 0.163            | -0.096        | -15.02         | 10.76        | -36.14         | 6.11           | -2.24        | 253        | 489        |
| <b>L Rostral middle frontal</b> | <b>&lt;0.001</b> | <b>-0.256</b> | <b>-192.90</b> | <b>54.08</b> | <b>-299.08</b> | <b>-86.72</b>  | <b>-3.51</b> | <b>255</b> | <b>500</b> |
| <b>R Rostral middle frontal</b> | <b>&lt;0.001</b> | <b>-0.248</b> | <b>-194.43</b> | <b>55.56</b> | <b>-303.51</b> | <b>-85.36</b>  | <b>-3.45</b> | <b>257</b> | <b>498</b> |
| L Superior frontal              | 0.026            | -0.159        | -133.08        | 59.62        | -250.14        | -16.01         | -1.91        | 251        | 488        |
| R Superior frontal              | 0.008            | -0.193        | -158.20        | 59.10        | -274.22        | -42.17         | -2.35        | 250        | 494        |
| <b>L Superior parietal</b>      | <b>&lt;0.001</b> | <b>-0.306</b> | <b>-199.57</b> | <b>49.33</b> | <b>-296.43</b> | <b>-102.71</b> | <b>-3.77</b> | <b>242</b> | <b>495</b> |
| <b>R Superior parietal</b>      | <b>&lt;0.001</b> | <b>-0.257</b> | <b>-165.69</b> | <b>48.27</b> | <b>-260.46</b> | <b>-70.92</b>  | <b>-3.11</b> | <b>245</b> | <b>495</b> |
| L Superior temporal             | 0.049            | -0.154        | -68.84         | 34.84        | -137.26        | -0.42          | -1.86        | 210        | 451        |
| R Superior temporal             | 0.022            | -0.170        | -64.08         | 27.96        | -118.99        | -9.18          | -1.84        | 237        | 478        |
| L Supramarginal                 | 0.013            | -0.188        | -110.99        | 44.78        | -198.92        | -23.06         | -2.92        | 243        | 476        |
| R Supramarginal                 | 0.098            | -0.124        | -65.19         | 39.35        | -142.45        | 12.07          | -1.82        | 247        | 491        |
| L Temporal pole                 | 0.025            | -0.162        | -11.49         | 5.11         | -21.53         | -1.45          | -2.42        | 237        | 494        |
| R Temporal pole                 | 0.141            | -0.106        | -7.78          | 5.28         | -18.14         | 2.58           | -1.82        | 240        | 487        |
| L Transverse temporal           | 0.953            | -0.004        | -0.35          | 5.98         | -12.09         | 11.39          | -0.08        | 257        | 501        |
| R Transverse temporal           | 0.248            | -0.085        | -4.77          | 4.13         | -12.88         | 3.33           | -1.43        | 257        | 501        |

Results of cortical surface area analysis of HY stage 3 PD vs matched healthy controls. L – Left, R – Right, ROI – region of interest, Banks STS – Banks of the superior temporal sulcus. **Boldface** denotes significant results after Bonferroni correction

### Supplementary Table 4h: Cortical surface area results - HY4&5 PD vs controls

| ROI Surface Area            | <i>p</i> | <i>d</i> | <i>b</i> | SE    | Lower CI | Upper CI | % diff | NPD | NHC |
|-----------------------------|----------|----------|----------|-------|----------|----------|--------|-----|-----|
| L Banks STS                 | 0.150    | -0.162   | -26.46   | 18.36 | -62.57   | 9.65     | -2.70  | 74  | 299 |
| R Banks STS                 | 0.105    | -0.187   | -26.81   | 16.51 | -59.28   | 5.66     | -3.01  | 79  | 317 |
| L Caudal anterior cingulate | 0.451    | -0.091   | -11.67   | 15.48 | -42.11   | 18.77    | -1.92  | 82  | 325 |
| R Caudal anterior cingulate | 0.742    | -0.038   | -5.99    | 18.18 | -41.74   | 29.77    | -0.82  | 83  | 328 |
| L Caudal middle frontal     | 0.543    | -0.073   | -23.20   | 38.09 | -98.09   | 51.70    | -1.06  | 82  | 327 |
| R Caudal middle frontal     | 0.423    | -0.095   | -33.45   | 41.66 | -115.36  | 48.47    | -1.62  | 81  | 326 |
| L Cuneus                    | 0.090    | -0.211   | -44.79   | 26.35 | -96.61   | 7.03     | -3.13  | 76  | 306 |
| R Cuneus                    | 0.007    | -0.334   | -69.19   | 25.43 | -119.22  | -19.15   | -4.68  | 74  | 290 |
| L Entorhinal                | 0.320    | -0.122   | -10.17   | 10.21 | -30.25   | 9.90     | -2.46  | 83  | 324 |
| R Entorhinal                | 0.757    | -0.036   | -2.96    | 9.55  | -21.74   | 15.83    | -0.86  | 83  | 316 |

|                              |                  |               |                |              |                |                |              |           |            |
|------------------------------|------------------|---------------|----------------|--------------|----------------|----------------|--------------|-----------|------------|
| L Frontal pole               | 0.085            | -0.179        | -6.97          | 4.04         | -14.91         | 0.97           | -3.34        | 83        | 325        |
| R Frontal pole               | 0.507            | 0.074         | 3.51           | 5.28         | -6.88          | 13.89          | 1.29         | 83        | 326        |
| L Fusiform                   | 0.028            | -0.251        | -90.07         | 40.88        | -170.46        | -9.69          | -2.94        | 83        | 328        |
| R Fusiform                   | <0.001           | -0.379        | -139.17        | 41.83        | -221.43        | -56.91         | -4.64        | 83        | 329        |
| L Inferior parietal          | 0.006            | -0.320        | -184.95        | 66.82        | -316.36        | -53.54         | -4.17        | 81        | 312        |
| R Inferior parietal          | 0.030            | -0.249        | -158.79        | 72.92        | -302.19        | -15.39         | -3.04        | 83        | 321        |
| <b>L Inferior temporal</b>   | <b>&lt;0.001</b> | <b>-0.405</b> | <b>-181.61</b> | <b>50.55</b> | <b>-281.03</b> | <b>-82.19</b>  | <b>-5.73</b> | <b>81</b> | <b>315</b> |
| R Inferior temporal          | 0.229            | -0.137        | -54.20         | 45.01        | -142.71        | 34.31          | -1.81        | 82        | 323        |
| L Insula                     | 0.174            | -0.146        | -35.31         | 25.95        | -86.33         | 15.72          | -1.63        | 83        | 326        |
| R Insula                     | 0.002            | -0.344        | -93.40         | 30.47        | -153.31        | -33.48         | -4.18        | 83        | 326        |
| L Isthmus cingulate          | 0.901            | 0.015         | 2.19           | 17.65        | -32.51         | 36.89          | 0.22         | 82        | 327        |
| R Isthmus cingulate          | 0.231            | 0.137         | 20.15          | 16.80        | -12.88         | 53.18          | 2.18         | 83        | 329        |
| <b>L Lateral occipital</b>   | <b>&lt;0.001</b> | <b>-0.423</b> | <b>-257.06</b> | <b>70.62</b> | <b>-395.94</b> | <b>-118.17</b> | <b>-5.50</b> | <b>78</b> | <b>319</b> |
| R Lateral occipital          | 0.032            | -0.249        | -154.31        | 71.68        | -295.28        | -13.33         | -3.38        | 80        | 321        |
| L Lateral orbitofrontal      | 0.006            | -0.320        | -83.00         | 30.05        | -142.09        | -23.90         | -3.34        | 83        | 328        |
| R Lateral orbitofrontal      | 0.066            | -0.211        | -61.06         | 33.15        | -126.24        | 4.12           | -2.51        | 82        | 329        |
| L Lingual                    | 0.002            | -0.366        | -153.06        | 50.03        | -251.44        | -54.68         | -5.20        | 78        | 325        |
| R Lingual                    | 0.009            | -0.305        | -135.01        | 51.41        | -236.12        | -33.90         | -4.56        | 78        | 315        |
| L Medial orbitofrontal       | 0.002            | -0.351        | -73.57         | 23.73        | -120.23        | -26.91         | -4.10        | 83        | 323        |
| R Medial orbitofrontal       | 0.419            | -0.090        | -17.94         | 22.17        | -61.54         | 25.67          | -1.01        | 83        | 325        |
| L Middle temporal            | 0.029            | -0.257        | -102.39        | 46.75        | -194.34        | -10.44         | -3.49        | 77        | 305        |
| R Middle temporal            | 0.001            | -0.375        | -145.50        | 44.08        | -232.19        | -58.81         | -4.50        | 82        | 318        |
| L Paracentral                | 0.429            | -0.095        | -17.35         | 21.92        | -60.44         | 25.75          | -1.32        | 83        | 326        |
| R Paracentral                | 0.484            | -0.072        | -15.49         | 22.09        | -58.92         | 27.95          | -1.04        | 83        | 326        |
| L Parahippocampal            | 0.188            | -0.151        | -16.65         | 12.63        | -41.47         | 8.18           | -2.46        | 83        | 327        |
| R Parahippocampal            | 0.724            | -0.040        | -3.29          | 9.29         | -21.55         | 14.97          | -0.51        | 83        | 328        |
| L Pars opercularis           | 0.832            | -0.026        | -6.19          | 29.14        | -63.49         | 51.11          | -0.40        | 83        | 327        |
| R Pars opercularis           | 0.029            | -0.253        | -54.52         | 24.89        | -103.47        | -5.57          | -4.05        | 83        | 328        |
| L Pars orbitalis             | 0.011            | -0.297        | -22.91         | 8.94         | -40.49         | -5.33          | -3.77        | 83        | 327        |
| R Pars orbitalis             | 0.009            | -0.301        | -29.71         | 11.39        | -52.11         | -7.30          | -4.03        | 83        | 328        |
| L Pars triangularis          | 0.086            | -0.201        | -39.29         | 22.85        | -84.23         | 5.65           | -3.24        | 82        | 328        |
| R Pars triangularis          | 0.379            | -0.105        | -21.45         | 24.37        | -69.38         | 26.47          | -1.53        | 83        | 329        |
| L Pericalcarine              | 0.031            | -0.267        | -67.07         | 31.00        | -128.04        | -6.10          | -5.01        | 75        | 308        |
| R Pericalcarine              | 0.003            | -0.369        | -97.01         | 32.61        | -161.17        | -32.84         | -6.61        | 71        | 287        |
| L Postcentral                | 0.281            | -0.124        | -54.76         | 50.71        | -154.50        | 44.98          | -1.33        | 81        | 309        |
| R Postcentral                | 0.048            | -0.230        | -96.98         | 48.89        | -193.12        | -0.84          | -2.45        | 81        | 314        |
| L Posterior cingulate        | 0.212            | -0.145        | -24.99         | 20.01        | -64.34         | 14.35          | -2.27        | 83        | 328        |
| R Posterior cingulate        | 0.037            | -0.239        | -42.40         | 20.21        | -82.14         | -2.67          | -3.72        | 81        | 328        |
| L Precentral                 | 0.315            | -0.117        | -53.85         | 53.53        | -159.14        | 51.44          | -1.12        | 80        | 310        |
| R Precentral                 | 0.350            | -0.106        | -49.91         | 53.38        | -154.90        | 55.08          | -1.03        | 81        | 313        |
| <b>L Precuneus</b>           | <b>&lt;0.001</b> | <b>-0.424</b> | <b>-186.28</b> | <b>48.56</b> | <b>-281.76</b> | <b>-90.81</b>  | <b>-5.10</b> | <b>83</b> | <b>327</b> |
| <b>R Precuneus</b>           | <b>&lt;0.001</b> | <b>-0.400</b> | <b>-180.86</b> | <b>50.77</b> | <b>-280.69</b> | <b>-81.03</b>  | <b>-4.79</b> | <b>83</b> | <b>328</b> |
| L Rostral anterior cingulate | 0.451            | -0.089        | -13.14         | 17.41        | -47.38         | 21.10          | -1.61        | 83        | 318        |
| R Rostral anterior cingulate | 0.592            | -0.059        | -8.71          | 16.23        | -40.63         | 23.21          | -1.33        | 83        | 324        |
| L Rostral middle frontal     | 0.010            | -0.292        | -189.61        | 73.58        | -334.30        | -44.91         | -3.48        | 83        | 328        |
| R Rostral middle frontal     | 0.106            | -0.182        | -126.62        | 78.10        | -280.20        | 26.96          | -2.28        | 83        | 324        |
| L Superior frontal           | 0.007            | -0.299        | -216.21        | 80.30        | -374.12        | -58.31         | -3.15        | 81        | 319        |
| R Superior frontal           | 0.009            | -0.297        | -211.42        | 81.05        | -370.81        | -52.02         | -3.19        | 82        | 319        |
| L Superior parietal          | 0.011            | -0.307        | -186.21        | 72.72        | -329.22        | -43.19         | -3.55        | 83        | 317        |

|                       |       |        |         |       |         |        |       |    |     |
|-----------------------|-------|--------|---------|-------|---------|--------|-------|----|-----|
| R Superior parietal   | 0.016 | -0.279 | -161.48 | 66.74 | -292.73 | -30.23 | -3.09 | 83 | 321 |
| L Superior temporal   | 0.026 | -0.257 | -109.15 | 48.84 | -205.22 | -13.08 | -2.99 | 76 | 294 |
| R Superior temporal   | 0.001 | -0.361 | -124.74 | 38.63 | -200.72 | -48.76 | -3.59 | 80 | 311 |
| L Supramarginal       | 0.103 | -0.192 | -97.91  | 59.85 | -215.62 | 19.81  | -2.66 | 83 | 311 |
| R Supramarginal       | 0.039 | -0.239 | -108.40 | 52.40 | -211.45 | -5.35  | -3.08 | 83 | 320 |
| L Temporal pole       | 0.293 | -0.126 | -7.90   | 7.51  | -22.68  | 6.87   | -1.68 | 80 | 324 |
| R Temporal pole       | 0.798 | -0.029 | -2.04   | 7.96  | -17.69  | 13.61  | -0.48 | 82 | 316 |
| L Transverse temporal | 0.726 | -0.040 | -3.16   | 9.00  | -20.85  | 14.54  | -0.70 | 83 | 328 |
| R Transverse temporal | 0.134 | -0.174 | -9.46   | 6.29  | -21.84  | 2.91   | -2.86 | 83 | 329 |

Results of cortical surface area analysis of HY stage 4&5 PD vs matched healthy controls. L – Left, R – Right, ROI – region of interest, Banks STS – Banks of the superior temporal sulcus. **Boldface** denotes significant results after Bonferroni correction

### Supplementary Table 4i: Subcortical volume results - HY1 PD vs controls

| ROI Subcortical     | <i>p</i>     | <i>d</i>     | <i>b</i>      | SE           | Lower CI     | Upper CI      | % diff      | NPD        | NHC        |
|---------------------|--------------|--------------|---------------|--------------|--------------|---------------|-------------|------------|------------|
| L Amygdala          | 0.199        | -0.064       | -17.14        | 13.35        | -43.33       | 9.06          | -1.15       | 428        | 834        |
| R Amygdala          | 0.901        | 0.006        | 1.68          | 13.5         | -24.79       | 28.16         | 0.11        | 430        | 827        |
| L Caudate nucleus   | 0.306        | 0.054        | 25.92         | 25.3         | -23.72       | 75.55         | 0.76        | 430        | 835        |
| R Caudate nucleus   | 0.157        | 0.072        | 36.6          | 25.85        | -14.12       | 87.33         | 1.05        | 432        | 844        |
| L Globus pallidus   | 0.396        | -0.041       | -12.66        | 14.91        | -41.91       | 16.59         | -0.86       | 418        | 762        |
| R Globus pallidus   | 0.188        | -0.068       | -18.17        | 13.8         | -45.25       | 8.9           | -1.21       | 423        | 823        |
| L Hippocampus       | 0.185        | 0.069        | 36.79         | 27.76        | -17.67       | 91.24         | 0.93        | 428        | 819        |
| R Hippocampus       | 0.225        | 0.062        | 34.19         | 28.13        | -21.01       | 89.38         | 0.84        | 429        | 831        |
| L Lateral ventricle | 0.220        | 0.069        | 494           | 402.53       | -295.73      | 1283.73       | 4.22        | 434        | 840        |
| R Lateral ventricle | 0.055        | 0.109        | 725.13        | 376.92       | -14.35       | 1464.62       | 6.74        | 433        | 841        |
| L Nucleus accumbens | 0.907        | 0.006        | 0.83          | 7.08         | -13.06       | 14.72         | 0.17        | 434        | 832        |
| R Nucleus accumbens | 0.916        | 0.005        | 0.71          | 6.67         | -12.39       | 13.8          | 0.14        | 432        | 824        |
| L Putamen           | 0.146        | -0.077       | -59.36        | 40.79        | -139.39      | 20.68         | -1.17       | 422        | 763        |
| R Putamen           | 0.157        | -0.074       | -55.82        | 39.41        | -133.14      | 21.49         | -1.15       | 424        | 814        |
| <b>L Thalamus</b>   | <b>0.002</b> | <b>0.151</b> | <b>153.72</b> | <b>49.27</b> | <b>57.04</b> | <b>250.39</b> | <b>2.15</b> | <b>417</b> | <b>809</b> |
| R Thalamus          | 0.094        | 0.086        | 68.45         | 40.83        | -11.66       | 148.56        | 1.03        | 420        | 815        |

Results of subcortical volume analysis of HY stage 1 PD vs matched healthy controls. L – Left, R – Right, ROI – region of interest. **Boldface** denotes significant results after Bonferroni correction

### Supplementary Table 4j: Subcortical volume results - HY2 PD vs controls

| ROI Subcortical     | <i>p</i>         | <i>d</i>      | <i>b</i>      | SE           | Lower CI      | Upper CI      | % diff       | NPD        | NHC        |
|---------------------|------------------|---------------|---------------|--------------|---------------|---------------|--------------|------------|------------|
| <b>L Amygdala</b>   | <b>&lt;0.001</b> | <b>-0.159</b> | <b>-44.62</b> | <b>11.07</b> | <b>-66.34</b> | <b>-22.91</b> | <b>-2.99</b> | <b>927</b> | <b>894</b> |
| <b>R Amygdala</b>   | <b>0.002</b>     | <b>-0.119</b> | <b>-36.37</b> | <b>11.66</b> | <b>-59.24</b> | <b>-13.51</b> | <b>-2.28</b> | <b>924</b> | <b>891</b> |
| L Caudate nucleus   | 0.006            | -0.113        | -61.99        | 22.67        | -106.45       | -17.53        | -1.80        | 929        | 895        |
| R Caudate nucleus   | 0.066            | -0.075        | -41.79        | 22.71        | -86.33        | 2.74          | -1.20        | 925        | 904        |
| L Globus pallidus   | 0.064            | -0.074        | -23.72        | 12.81        | -48.84        | 1.39          | -1.60        | 893        | 812        |
| R Globus pallidus   | 0.429            | -0.031        | -9.04         | 11.44        | -31.48        | 13.39         | -0.61        | 919        | 880        |
| L Hippocampus       | 0.225            | -0.049        | -29.14        | 23.99        | -76.2         | 17.91         | -0.74        | 915        | 882        |
| R Hippocampus       | 0.305            | -0.040        | -24.39        | 23.8         | -71.07        | 22.28         | -0.60        | 922        | 888        |
| L Lateral ventricle | 0.165            | 0.062         | 489.92        | 352.6        | -201.64       | 1181.47       | 3.69         | 937        | 902        |



|                     |                  |               |                |              |                |               |              |            |            |
|---------------------|------------------|---------------|----------------|--------------|----------------|---------------|--------------|------------|------------|
| R Lateral ventricle | 0.089            | 0.076         | 543.48         | 319.86       | -83.85         | 1170.81       | 4.47         | 937        | 903        |
| L Nucleus accumbens | 0.124            | -0.062        | -8.85          | 5.75         | -20.13         | 2.43          | -1.85        | 926        | 895        |
| R Nucleus accumbens | 0.138            | -0.059        | -8             | 5.39         | -18.56         | 2.57          | -1.62        | 919        | 886        |
| <b>L Putamen</b>    | <b>&lt;0.001</b> | <b>-0.152</b> | <b>-123.03</b> | <b>33.36</b> | <b>-188.46</b> | <b>-57.61</b> | <b>-2.45</b> | <b>904</b> | <b>823</b> |
| <b>R Putamen</b>    | <b>&lt;0.001</b> | <b>-0.152</b> | <b>-119.63</b> | <b>31.18</b> | <b>-180.78</b> | <b>-58.48</b> | <b>-2.49</b> | <b>926</b> | <b>866</b> |
| L Thalamus          | 0.045            | 0.075         | 82.32          | 41.06        | 1.79           | 162.86        | 1.15         | 892        | 865        |
| R Thalamus          | 0.188            | 0.052         | 46.04          | 34.93        | -22.46         | 114.54        | 0.69         | 911        | 878        |

Results of subcortical volume analysis of HY stage 2 PD vs matched healthy controls. L – Left, R – Right, ROI – region of interest. **Boldface** denotes significant results after Bonferroni correction

### Supplementary Table 4k: Subcortical volume results - HY3 PD vs controls

| ROI Subcortical          | <i>p</i>         | <i>d</i>      | <i>b</i>       | SE           | Lower CI       | Upper CI       | % diff       | NPD        | NHC        |
|--------------------------|------------------|---------------|----------------|--------------|----------------|----------------|--------------|------------|------------|
| <b>L Amygdala</b>        | <b>&lt;0.001</b> | <b>-0.441</b> | <b>-126.03</b> | <b>19.43</b> | <b>-164.18</b> | <b>-87.88</b>  | <b>-8.63</b> | <b>256</b> | <b>492</b> |
| <b>R Amygdala</b>        | <b>&lt;0.001</b> | <b>-0.316</b> | <b>-98.12</b>  | <b>20.91</b> | <b>-139.18</b> | <b>-57.06</b>  | <b>-6.28</b> | <b>257</b> | <b>491</b> |
| <b>L Caudate nucleus</b> | <b>0.001</b>     | <b>-0.221</b> | <b>-128.51</b> | <b>39.79</b> | <b>-206.64</b> | <b>-50.39</b>  | <b>-3.72</b> | <b>251</b> | <b>494</b> |
| R Caudate nucleus        | 0.010            | -0.170        | -103.46        | 39.86        | -181.73        | -25.20         | -2.97        | 255        | 500        |
| L Globus pallidus        | 0.008            | -0.169        | -59.24         | 22.43        | -103.28        | -15.19         | -3.97        | 239        | 445        |
| R Globus pallidus        | 0.020            | -0.152        | -48.34         | 20.66        | -88.91         | -7.77          | -3.22        | 249        | 481        |
| <b>L Hippocampus</b>     | <b>&lt;0.001</b> | <b>-0.240</b> | <b>-133.03</b> | <b>40.25</b> | <b>-212.07</b> | <b>-54.00</b>  | <b>-3.43</b> | <b>249</b> | <b>477</b> |
| <b>R Hippocampus</b>     | <b>&lt;0.001</b> | <b>-0.283</b> | <b>-170.77</b> | <b>42.26</b> | <b>-253.74</b> | <b>-87.80</b>  | <b>-4.27</b> | <b>255</b> | <b>487</b> |
| L Lateral ventricle      | 0.032            | 0.158         | 1426.00        | 664.17       | 122.04         | 2729.96        | 9.70         | 257        | 498        |
| R Lateral ventricle      | 0.023            | 0.166         | 1356.27        | 597.40       | 183.40         | 2529.14        | 10.06        | 257        | 499        |
| L Nucleus accumbens      | 0.023            | -0.150        | -23.16         | 10.13        | -43.05         | -3.27          | -4.98        | 256        | 492        |
| R Nucleus accumbens      | 0.013            | -0.157        | -23.31         | 9.38         | -41.73         | -4.89          | -4.83        | 251        | 490        |
| <b>L Putamen</b>         | <b>&lt;0.001</b> | <b>-0.267</b> | <b>-230.11</b> | <b>55.72</b> | <b>-339.53</b> | <b>-120.69</b> | <b>-4.67</b> | <b>242</b> | <b>450</b> |
| <b>R Putamen</b>         | <b>&lt;0.001</b> | <b>-0.239</b> | <b>-195.14</b> | <b>51.77</b> | <b>-296.78</b> | <b>-93.50</b>  | <b>-4.16</b> | <b>249</b> | <b>473</b> |
| L Thalamus               | 0.980            | 0.002         | 1.73           | 69.11        | -133.96        | 137.42         | 0.02         | 249        | 478        |
| R Thalamus               | 0.185            | -0.088        | -80.69         | 60.84        | -200.16        | 38.77          | -1.23        | 250        | 487        |

Results of subcortical volume analysis of HY stage 3 PD vs matched healthy controls. L – Left, R – Right, ROI – region of interest. **Boldface** denotes significant results after Bonferroni correction

### Supplementary Table 4l: Subcortical volume results - HY4&5 PD vs controls

| ROI Subcortical            | <i>p</i>         | <i>d</i>      | <i>b</i>       | SE            | Lower CI       | Upper CI       | % diff        | NPD       | NHC        |
|----------------------------|------------------|---------------|----------------|---------------|----------------|----------------|---------------|-----------|------------|
| <b>L Amygdala</b>          | <b>&lt;0.001</b> | <b>-0.640</b> | <b>-163.65</b> | <b>27.08</b>  | <b>-216.90</b> | <b>-110.39</b> | <b>-11.61</b> | <b>83</b> | <b>323</b> |
| <b>R Amygdala</b>          | <b>&lt;0.001</b> | <b>-0.554</b> | <b>-154.92</b> | <b>28.86</b>  | <b>-211.68</b> | <b>-98.16</b>  | <b>-9.98</b>  | <b>83</b> | <b>322</b> |
| <b>L Caudate nucleus</b>   | <b>0.002</b>     | <b>-0.329</b> | <b>-177.27</b> | <b>56.29</b>  | <b>-287.96</b> | <b>-66.58</b>  | <b>-5.20</b>  | <b>82</b> | <b>327</b> |
| R Caudate nucleus          | 0.032            | -0.223        | -124.57        | 57.82         | -238.27        | -10.87         | -3.62         | 81        | 329        |
| <b>L Globus pallidus</b>   | <b>0.002</b>     | <b>-0.317</b> | <b>-102.32</b> | <b>32.14</b>  | <b>-165.54</b> | <b>-39.09</b>  | <b>-6.97</b>  | <b>83</b> | <b>292</b> |
| R Globus pallidus          | 0.011            | -0.261        | -83.00         | 32.28         | -146.49        | -19.51         | -5.67         | 82        | 314        |
| <b>L Hippocampus</b>       | <b>&lt;0.001</b> | <b>-0.546</b> | <b>-257.72</b> | <b>55.09</b>  | <b>-366.06</b> | <b>-149.37</b> | <b>-6.82</b>  | <b>81</b> | <b>318</b> |
| <b>R Hippocampus</b>       | <b>&lt;0.001</b> | <b>-0.616</b> | <b>-318.63</b> | <b>58.09</b>  | <b>-432.87</b> | <b>-204.39</b> | <b>-8.11</b>  | <b>82</b> | <b>318</b> |
| <b>L Lateral ventricle</b> | <b>0.002</b>     | <b>0.357</b>  | <b>2761.46</b> | <b>885.08</b> | <b>1021.08</b> | <b>4501.84</b> | <b>18.43</b>  | <b>83</b> | <b>329</b> |
| <b>R Lateral ventricle</b> | <b>&lt;0.001</b> | <b>0.523</b>  | <b>3724.85</b> | <b>814.85</b> | <b>2122.56</b> | <b>5327.15</b> | <b>27.80</b>  | <b>83</b> | <b>328</b> |
| L Nucleus accumbens        | 0.007            | -0.294        | -39.29         | 14.46         | -67.71         | -10.86         | -8.58         | 82        | 324        |
| <b>R Nucleus accumbens</b> | <b>&lt;0.001</b> | <b>-0.473</b> | <b>-59.94</b>  | <b>13.14</b>  | <b>-85.79</b>  | <b>-34.10</b>  | <b>-12.46</b> | <b>81</b> | <b>320</b> |

|                  |                  |               |                |              |                |                |              |           |            |
|------------------|------------------|---------------|----------------|--------------|----------------|----------------|--------------|-----------|------------|
| <b>L Putamen</b> | <b>&lt;0.001</b> | <b>-0.423</b> | <b>-314.82</b> | <b>78.06</b> | <b>-468.37</b> | <b>-161.27</b> | <b>-6.43</b> | <b>80</b> | <b>296</b> |
| <b>R Putamen</b> | <b>&lt;0.001</b> | <b>-0.473</b> | <b>-350.88</b> | <b>77.40</b> | <b>-503.10</b> | <b>-198.66</b> | <b>-7.47</b> | <b>82</b> | <b>311</b> |
| L Thalamus       | 0.027            | -0.223        | -203.27        | 91.70        | -383.62        | -22.92         | -2.99        | 81        | 310        |
| R Thalamus       | 0.029            | -0.220        | -178.29        | 81.16        | -337.90        | -18.68         | -2.77        | 82        | 317        |

Results of subcortical volume analysis of HY stages 4&5 PD vs matched healthy controls. L – Left, R – Right, ROI – region of interest. **Boldface** denotes significant results after Bonferroni correction

## Supplementary table 5a: Results of regression analysis of MoCA score and cortical thickness

| ROI Thickness                  | <i>p</i>         | <i>r</i>     | <i>b</i>     | SE           | Lower CI | Upper CI | NPD         |
|--------------------------------|------------------|--------------|--------------|--------------|----------|----------|-------------|
| L Banks STS                    | 0.002            | 0.082        | 0.006        | 0.002        | 0.002    | 0.010    | 940         |
| R Banks STS                    | 0.002            | 0.077        | 0.006        | 0.002        | 0.002    | 0.010    | 1005        |
| L Caudal anterior cingulate    | 0.437            | 0.021        | 0.002        | 0.003        | -0.003   | 0.008    | 1026        |
| R Caudal anterior cingulate    | 0.558            | 0.015        | 0.002        | 0.003        | -0.004   | 0.007    | 1025        |
| <b>L Caudal middle frontal</b> | <b>&lt;0.001</b> | <b>0.119</b> | <b>0.007</b> | <b>0.002</b> | 0.004    | 0.011    | <b>1034</b> |
| <b>R Caudal middle frontal</b> | <b>&lt;0.001</b> | <b>0.104</b> | <b>0.006</b> | <b>0.002</b> | 0.003    | 0.009    | <b>1034</b> |
| L Cuneus                       | 0.158            | 0.039        | 0.002        | 0.002        | -0.001   | 0.005    | 939         |
| R Cuneus                       | 0.414            | 0.022        | 0.001        | 0.002        | -0.002   | 0.004    | 929         |
| L Entorhinal                   | 0.042            | 0.056        | 0.007        | 0.003        | <0.001   | 0.013    | 1017        |
| R Entorhinal                   | 0.016            | 0.067        | 0.009        | 0.004        | 0.002    | 0.016    | 1011        |
| <b>L Frontal pole</b>          | <b>&lt;0.001</b> | <b>0.107</b> | <b>0.011</b> | <b>0.003</b> | 0.005    | 0.016    | <b>1031</b> |
| R Frontal pole                 | 0.008            | 0.074        | 0.007        | 0.003        | 0.002    | 0.013    | 1030        |
| <b>L Fusiform</b>              | <b>&lt;0.001</b> | <b>0.139</b> | <b>0.009</b> | <b>0.002</b> | 0.006    | 0.013    | <b>1012</b> |
| <b>R Fusiform</b>              | <b>&lt;0.001</b> | <b>0.140</b> | <b>0.010</b> | <b>0.002</b> | 0.006    | 0.013    | <b>1019</b> |
| L Inferior parietal            | 0.004            | 0.073        | 0.004        | 0.002        | 0.001    | 0.007    | 1006        |
| <b>R Inferior parietal</b>     | <b>&lt;0.001</b> | <b>0.092</b> | <b>0.006</b> | <b>0.002</b> | 0.003    | 0.009    | <b>1004</b> |
| <b>L Inferior temporal</b>     | <b>&lt;0.001</b> | <b>0.111</b> | <b>0.008</b> | <b>0.002</b> | 0.004    | 0.011    | <b>991</b>  |
| <b>R Inferior temporal</b>     | <b>&lt;0.001</b> | <b>0.103</b> | <b>0.007</b> | <b>0.002</b> | 0.004    | 0.010    | <b>1007</b> |
| <b>L Insula</b>                | <b>&lt;0.001</b> | <b>0.116</b> | <b>0.008</b> | <b>0.002</b> | 0.004    | 0.011    | <b>1031</b> |
| <b>R Insula</b>                | <b>&lt;0.001</b> | <b>0.124</b> | <b>0.009</b> | <b>0.002</b> | 0.005    | 0.013    | <b>1028</b> |
| L Isthmus cingulate            | 0.028            | 0.060        | 0.004        | 0.002        | <0.001   | 0.008    | 1031        |
| R Isthmus cingulate            | 0.007            | 0.074        | 0.006        | 0.002        | 0.002    | 0.010    | 1031        |
| L Lateral occipital            | 0.515            | 0.017        | 0.001        | 0.001        | -0.002   | 0.004    | 1006        |
| R Lateral occipital            | 0.012            | 0.064        | 0.004        | 0.001        | 0.001    | 0.006    | 1007        |
| L Lateral orbitofrontal        | 0.007            | 0.064        | 0.005        | 0.002        | 0.001    | 0.008    | 1025        |
| R Lateral orbitofrontal        | <0.001           | 0.082        | 0.006        | 0.002        | 0.002    | 0.009    | 1026        |
| L Lingual                      | 0.003            | 0.082        | 0.004        | 0.001        | 0.001    | 0.007    | 998         |
| R Lingual                      | 0.006            | 0.074        | 0.004        | 0.001        | 0.001    | 0.007    | 981         |
| L Medial orbitofrontal         | 0.001            | 0.085        | 0.006        | 0.002        | 0.002    | 0.009    | 1019        |
| R Medial orbitofrontal         | 0.007            | 0.065        | 0.005        | 0.002        | 0.001    | 0.009    | 1022        |
| <b>L Middle temporal</b>       | <b>&lt;0.001</b> | <b>0.133</b> | <b>0.010</b> | <b>0.002</b> | 0.006    | 0.013    | <b>943</b>  |
| <b>R Middle temporal</b>       | <b>&lt;0.001</b> | <b>0.101</b> | <b>0.008</b> | <b>0.002</b> | 0.004    | 0.011    | <b>1005</b> |
| L Paracentral                  | 0.002            | 0.082        | 0.006        | 0.002        | 0.002    | 0.009    | 1028        |
| R Paracentral                  | 0.002            | 0.084        | 0.005        | 0.002        | 0.002    | 0.009    | 1026        |
| L Parahippocampal              | 0.180            | 0.037        | 0.004        | 0.003        | -0.002   | 0.010    | 1030        |
| R Parahippocampal              | 0.003            | 0.078        | 0.008        | 0.003        | 0.003    | 0.013    | 1030        |
| <b>L Pars opercularis</b>      | <b>&lt;0.001</b> | <b>0.096</b> | <b>0.006</b> | <b>0.002</b> | 0.003    | 0.009    | <b>1025</b> |
| R Pars opercularis             | 0.002            | 0.081        | 0.005        | 0.002        | 0.002    | 0.008    | 1023        |
| L Pars orbitalis               | 0.084            | 0.046        | 0.004        | 0.002        | <0.001   | 0.008    | 1025        |
| R Pars orbitalis               | 0.031            | 0.055        | 0.004        | 0.002        | <0.001   | 0.008    | 1024        |

|                                     |                  |              |              |              |              |              |             |
|-------------------------------------|------------------|--------------|--------------|--------------|--------------|--------------|-------------|
| <b>L Pars triangularis</b>          | <b>&lt;0.001</b> | <b>0.135</b> | <b>0.009</b> | <b>0.002</b> | 0.006        | 0.012        | <b>1023</b> |
| <b>R Pars triangularis</b>          | <b>&lt;0.001</b> | <b>0.099</b> | <b>0.006</b> | <b>0.002</b> | 0.003        | 0.009        | <b>1022</b> |
| L Pericalcarine                     | 0.274            | 0.030        | 0.002        | 0.002        | -0.001       | 0.005        | 940         |
| R Pericalcarine                     | 0.295            | 0.029        | 0.002        | 0.002        | -0.001       | 0.005        | 912         |
| <b>L Postcentral</b>                | <b>&lt;0.001</b> | <b>0.097</b> | <b>0.005</b> | <b>0.001</b> | 0.003        | 0.008        | <b>995</b>  |
| R Postcentral                       | 0.002            | 0.079        | 0.004        | 0.001        | 0.002        | 0.007        | 996         |
| L Posterior cingulate               | 0.002            | 0.077        | 0.005        | 0.002        | 0.002        | 0.009        | 1032        |
| R Posterior cingulate               | 0.005            | 0.073        | 0.005        | 0.002        | 0.002        | 0.008        | 1031        |
| <b>L Precentral</b>                 | <b>&lt;0.001</b> | <b>0.125</b> | <b>0.008</b> | <b>0.002</b> | 0.005        | 0.012        | <b>1018</b> |
| <b>R Precentral</b>                 | <b>&lt;0.001</b> | <b>0.118</b> | <b>0.008</b> | <b>0.002</b> | 0.004        | 0.012        | <b>1021</b> |
| <b>L Precuneus</b>                  | <b>&lt;0.001</b> | <b>0.087</b> | <b>0.005</b> | <b>0.001</b> | 0.002        | 0.008        | <b>1033</b> |
| <b>R Precuneus</b>                  | <b>&lt;0.001</b> | <b>0.102</b> | <b>0.006</b> | <b>0.002</b> | 0.003        | 0.009        | <b>1032</b> |
| <b>L Rostral anterior cingulate</b> | <b>&lt;0.001</b> | <b>0.093</b> | <b>0.008</b> | <b>0.002</b> | 0.004        | 0.013        | <b>1022</b> |
| R Rostral anterior cingulate        | 0.355            | 0.024        | 0.002        | 0.003        | -0.003       | 0.008        | 1025        |
| <b>L Rostral middle frontal</b>     | <b>&lt;0.001</b> | <b>0.114</b> | <b>0.007</b> | <b>0.001</b> | 0.004        | 0.009        | <b>1026</b> |
| R Rostral middle frontal            | 0.002            | 0.070        | 0.004        | 0.001        | 0.001        | 0.007        | 1026        |
| <b>L Superior frontal</b>           | <b>&lt;0.001</b> | <b>0.100</b> | <b>0.006</b> | <b>0.002</b> | 0.003        | 0.009        | <b>1012</b> |
| <b>R Superior frontal</b>           | <b>&lt;0.001</b> | <b>0.105</b> | <b>0.006</b> | <b>0.002</b> | 0.003        | 0.009        | <b>1012</b> |
| L Superior parietal                 | 0.006            | 0.070        | 0.004        | 0.001        | 0.001        | 0.007        | 1003        |
| <b>R Superior parietal</b>          | <b>0.004</b>     | <b>0.071</b> | <b>0.004</b> | <b>0.001</b> | <b>0.001</b> | <b>0.007</b> | <b>1017</b> |
| <b>L Superior temporal</b>          | <b>&lt;0.001</b> | <b>0.120</b> | <b>0.008</b> | <b>0.002</b> | 0.005        | 0.012        | <b>904</b>  |
| <b>R Superior temporal</b>          | <b>&lt;0.001</b> | <b>0.116</b> | <b>0.008</b> | <b>0.002</b> | 0.005        | 0.012        | <b>979</b>  |
| L Supramarginal                     | 0.002            | 0.080        | 0.005        | 0.002        | 0.002        | 0.008        | 997         |
| R Supramarginal                     | 0.003            | 0.077        | 0.005        | 0.002        | 0.002        | 0.008        | 1005        |
| L Temporal pole                     | 0.011            | 0.074        | 0.009        | 0.004        | 0.002        | 0.016        | 971         |
| R Temporal pole                     | 0.002            | 0.090        | 0.011        | 0.004        | 0.004        | 0.018        | 999         |
| L Transverse temporal               | 0.002            | 0.086        | 0.007        | 0.002        | 0.002        | 0.012        | 1036        |
| <b>R Transverse temporal</b>        | <b>&lt;0.001</b> | <b>0.099</b> | <b>0.009</b> | <b>0.002</b> | 0.004        | 0.013        | <b>1035</b> |

Results of regression analysis of MoCA score and cortical thickness in PD sample. L – Left, R – Right, ROI – region of interest. Banks STS – Banks of the superior temporal sulcus. **Boldface** denotes significant results after Bonferroni correction.

## Supplementary table 5b: Results of regression analysis of MoCA score and surface area

| ROI Surface Area            | <i>p</i> | <i>r</i> | <i>b</i> | SE    | Lower CI     | Upper CI     | NPD  |
|-----------------------------|----------|----------|----------|-------|--------------|--------------|------|
| L Banks STS                 | 0.004    | 0.092    | 4.64     | 1.595 | 1.51         | 7.77         | 940  |
| R Banks STS                 | 0.151    | 0.043    | 1.99     | 1.388 | -0.73        | 4.72         | 1005 |
| L Caudal anterior cingulate | 0.045    | 0.060    | 2.82     | 1.405 | 0.06         | 5.57         | 1026 |
| R Caudal anterior cingulate | 0.049    | 0.058    | 3.12     | 1.585 | 0.01         | 6.23         | 1025 |
| L Caudal middle frontal     | 0.074    | 0.054    | 6.06     | 3.389 | <b>-0.59</b> | <b>12.71</b> | 1035 |
| R Caudal middle frontal     | 0.277    | 0.033    | 3.60     | 3.307 | <b>-2.90</b> | <b>10.09</b> | 1035 |
| L Cuneus                    | 0.796    | 0.008    | 0.52     | 1.997 | -3.40        | 4.44         | 939  |
| R Cuneus                    | 0.519    | 0.021    | 1.38     | 2.139 | -2.82        | 5.58         | 929  |
| L Entorhinal                | 0.860    | -0.005   | -0.16    | 0.905 | -1.94        | 1.62         | 1017 |
| R Entorhinal                | 0.940    | -0.002   | -0.06    | 0.839 | -1.71        | 1.58         | 1012 |
| L Frontal pole              | 0.426    | 0.021    | 0.25     | 0.311 | <b>-0.36</b> | <b>0.86</b>  | 1031 |
| R Frontal pole              | 0.225    | 0.034    | 0.50     | 0.414 | -0.31        | 1.32         | 1030 |
| L Fusiform                  | 0.660    | 0.013    | 1.51     | 3.428 | <b>-5.22</b> | <b>8.23</b>  | 1013 |
| R Fusiform                  | 0.485    | 0.021    | 2.30     | 3.290 | <b>-4.16</b> | <b>8.75</b>  | 1018 |
| L Inferior parietal         | 0.085    | 0.051    | 9.07     | 5.261 | -1.26        | 19.39        | 1006 |

|                              |                  |              |              |              |              |              |             |
|------------------------------|------------------|--------------|--------------|--------------|--------------|--------------|-------------|
| <b>R Inferior parietal</b>   | <b>&lt;0.001</b> | <b>0.122</b> | <b>23.83</b> | <b>5.904</b> | <b>12.25</b> | <b>35.42</b> | <b>1004</b> |
| L Inferior temporal          | 0.450            | 0.023        | 3.17         | 4.201        | -5.07        | 11.42        | 991         |
| R Inferior temporal          | 0.262            | 0.034        | 4.16         | 3.709        | -3.12        | 11.44        | 1007        |
| L Insula                     | 0.632            | 0.013        | 0.98         | 2.052        | -3.04        | 5.01         | 1031        |
| R Insula                     | 0.519            | -0.019       | -1.59        | 2.462        | -6.42        | 3.24         | 1028        |
| L Isthmus cingulate          | 0.100            | 0.048        | 2.44         | 1.484        | -0.47        | 5.35         | 1031        |
| R Isthmus cingulate          | 0.646            | -0.013       | -0.65        | 1.415        | -3.43        | 2.13         | 1031        |
| L Lateral occipital          | 0.727            | 0.010        | 1.82         | 5.204        | -8.40        | 12.03        | 1006        |
| R Lateral occipital          | 0.021            | 0.068        | 13.04        | 5.636        | 1.98         | 24.10        | 1007        |
| L Lateral orbitofrontal      | 0.204            | 0.039        | 3.14         | 2.472        | -1.71        | 8.00         | 1026        |
| R Lateral orbitofrontal      | 0.152            | 0.043        | 3.90         | 2.722        | -1.44        | 9.24         | 1027        |
| L Lingual                    | 0.151            | 0.044        | 5.48         | 3.811        | -2.00        | 12.96        | 998         |
| R Lingual                    | 0.325            | 0.030        | 3.77         | 3.828        | -3.74        | 11.28        | 981         |
| L Medial orbitofrontal       | 0.197            | 0.039        | 2.64         | 2.047        | -1.38        | 6.66         | 1018        |
| R Medial orbitofrontal       | 0.770            | -0.009       | -0.53        | 1.810        | -4.08        | 3.02         | 1021        |
| L Middle temporal            | 0.142            | 0.046        | 5.27         | 3.582        | -1.76        | 12.30        | 943         |
| R Middle temporal            | 0.085            | 0.052        | 6.08         | 3.532        | -0.85        | 13.01        | 1005        |
| L Paracentral                | 0.950            | 0.002        | 0.10         | 1.625        | -3.09        | 3.29         | 1028        |
| R Paracentral                | 0.661            | -0.013       | -0.92        | 2.091        | -5.02        | 3.19         | 1026        |
| L Parahippocampal            | 0.081            | 0.052        | 1.66         | 0.952        | -0.20        | 3.53         | 1030        |
| R Parahippocampal            | 0.089            | 0.051        | 1.59         | 0.935        | -0.24        | 3.43         | 1030        |
| <b>L Pars opercularis</b>    | <b>&lt;0.001</b> | <b>0.111</b> | <b>8.24</b>  | <b>2.231</b> | <b>3.86</b>  | <b>12.62</b> | <b>1025</b> |
| R Pars opercularis           | 0.186            | 0.040        | 2.56         | 1.933        | -1.24        | 6.35         | 1023        |
| L Pars orbitalis             | 0.012            | 0.073        | 1.90         | 0.755        | 0.41         | 3.38         | 1025        |
| R Pars orbitalis             | 0.068            | 0.054        | 1.73         | 0.945        | -0.13        | 3.58         | 1024        |
| L Pars triangularis          | 0.048            | 0.061        | 3.49         | 1.762        | 0.03         | 6.95         | 1023        |
| R Pars triangularis          | 0.307            | 0.031        | 2.25         | 2.201        | -2.07        | 6.57         | 1022        |
| L Pericalcarine              | 0.903            | -0.004       | -0.31        | 2.569        | -5.36        | 4.73         | 940         |
| R Pericalcarine              | 0.751            | -0.010       | -0.80        | 2.534        | -5.78        | 4.17         | 912         |
| L Postcentral                | 0.206            | 0.039        | 5.04         | 3.981        | -2.77        | 12.85        | 995         |
| R Postcentral                | 0.104            | 0.050        | 6.55         | 4.021        | -1.34        | 14.44        | 996         |
| L Posterior cingulate        | 0.147            | 0.043        | 2.97         | 2.044        | -1.04        | 6.98         | 1032        |
| R Posterior cingulate        | 0.263            | 0.032        | 1.83         | 1.631        | -1.38        | 5.03         | 1031        |
| L Precentral                 | 0.423            | 0.024        | 3.52         | 4.396        | -5.10        | 12.15        | 1018        |
| R Precentral                 | 0.014            | 0.074        | 11.18        | 4.523        | 2.30         | 20.06        | 1021        |
| L Precuneus                  | 0.004            | 0.086        | 11.31        | 3.896        | 3.66         | 18.95        | 1033        |
| R Precuneus                  | 0.089            | 0.050        | 7.11         | 4.180        | -1.09        | 15.31        | 1032        |
| L Rostral anterior cingulate | 0.673            | -0.013       | -0.67        | 1.587        | -3.78        | 2.44         | 1022        |
| R Rostral anterior cingulate | 0.377            | 0.025        | 1.14         | 1.287        | -1.39        | 3.66         | 1025        |
| L Rostral middle frontal     | 0.475            | 0.021        | 4.45         | 6.218        | -7.75        | 16.65        | 1026        |
| R Rostral middle frontal     | 0.281            | 0.031        | 6.85         | 6.347        | -5.61        | 19.30        | 1026        |
| L Superior frontal           | 0.994            | <0.001       | -0.05        | 6.706        | -13.21       | 13.11        | 1013        |
| R Superior frontal           | 0.166            | 0.041        | 9.54         | 6.881        | -3.96        | 23.04        | 1012        |
| L Superior parietal          | 0.001            | 0.096        | 17.64        | 5.523        | 6.80         | 28.47        | 1003        |
| R Superior parietal          | 0.001            | 0.096        | 17.04        | 5.344        | 6.55         | 27.53        | 1017        |
| L Superior temporal          | 0.169            | 0.043        | 5.43         | 3.950        | -2.32        | 13.19        | 904         |
| R Superior temporal          | 0.331            | 0.029        | 3.22         | 3.307        | -3.27        | 9.71         | 979         |
| L Supramarginal              | 0.002            | 0.093        | 16.45        | 5.329        | 5.99         | 26.91        | 997         |
| R Supramarginal              | 0.396            | 0.026        | 3.99         | 4.706        | -5.24        | 13.23        | 1005        |
| L Temporal pole              | 0.405            | 0.025        | 0.53         | 0.635        | -0.72        | 1.77         | 971         |
| R Temporal pole              | 0.545            | -0.018       | -0.38        | 0.630        | -1.62        | 0.85         | 999         |
| L Transverse temporal        | 0.014            | 0.074        | 1.84         | 0.749        | 0.37         | 3.31         | 1036        |

Results of regression analysis of MoCA score and cortical surface area in PD sample. L – Left, R – Right, ROI – region of interest. Banks STS – Banks of the superior temporal sulcus. **Boldface** denotes significant results after Bonferroni correction.

### Supplementary table 5c: Results of regression analysis of MoCA score and subcortical volume

| ROI Subcortical            | <i>p</i>         | <i>r</i>      | <i>b</i>       | SE           | Lower CI       | Upper CI       | NPD         |
|----------------------------|------------------|---------------|----------------|--------------|----------------|----------------|-------------|
| <b>L Amygdala</b>          | <b>&lt;0.001</b> | <b>0.133</b>  | <b>10.70</b>   | <b>2.08</b>  | 6.61           | 14.79          | <b>1047</b> |
| <b>R Amygdala</b>          | <b>&lt;0.001</b> | <b>0.110</b>  | <b>9.41</b>    | <b>2.19</b>  | 5.11           | 13.71          | <b>1049</b> |
| L Caudate nucleus          | 0.242            | 0.033         | 5.61           | 4.79         | -3.8           | 15.01          | 1044        |
| R Caudate nucleus          | 0.414            | 0.023         | 4.00           | 4.9          | -5.61          | 13.62          | 1045        |
| L Globus pallidus          | 0.957            | 0.001         | 0.14           | 2.52         | -4.81          | 5.08           | 1023        |
| R Globus pallidus          | 0.705            | 0.009         | 0.87           | 2.29         | -3.62          | 5.36           | 1040        |
| <b>L Hippocampus</b>       | <b>&lt;0.001</b> | <b>0.109</b>  | <b>16.84</b>   | <b>4.23</b>  | <b>8.54</b>    | <b>25.14</b>   | <b>1033</b> |
| <b>R Hippocampus</b>       | <b>&lt;0.001</b> | <b>0.118</b>  | <b>19.91</b>   | <b>4.45</b>  | <b>11.18</b>   | <b>28.65</b>   | <b>1046</b> |
| <b>L Lateral ventricle</b> | <b>&lt;0.001</b> | <b>-0.117</b> | <b>-289.26</b> | <b>73.37</b> | <b>-433.24</b> | <b>-145.29</b> | <b>1051</b> |
| <b>R Lateral ventricle</b> | <b>&lt;0.001</b> | <b>-0.113</b> | <b>-262.86</b> | <b>68.38</b> | <b>-397.05</b> | <b>-128.67</b> | <b>1051</b> |
| L Nucleus accumbens        | 0.016            | 0.063         | 2.76           | 1.15         | 0.51           | 5.01           | 1048        |
| R Nucleus accumbens        | 0.150            | 0.040         | 1.55           | 1.08         | -0.56          | 3.67           | 1049        |
| <b>L Putamen</b>           | <b>0.002</b>     | <b>0.081</b>  | <b>18.36</b>   | <b>6.05</b>  | <b>6.49</b>    | <b>30.23</b>   | <b>1024</b> |
| R Putamen                  | 0.045            | 0.056         | 11.78          | 5.86         | 0.28           | 23.28          | 1039        |
| L Thalamus                 | 0.060            | 0.050         | 13.83          | 7.35         | -0.61          | 28.26          | 1009        |
| R Thalamus                 | 0.083            | 0.046         | 10.76          | 6.2          | -1.4           | 22.92          | 1023        |

Results of regression analysis of MoCA score and subcortical volume in PD sample. L – Left, R – Right, ROI – region of interest. **Boldface** denotes significant results after Bonferroni correction.

### Supplementary Table 6a: Cortical thickness results - PD (MoCA group) vs controls

| ROI                         | <i>p</i>         | <i>d</i>      | <i>b</i>      | SE           | Lower CI      | Upper CI      | % diff        | NPD         | NHC         |
|-----------------------------|------------------|---------------|---------------|--------------|---------------|---------------|---------------|-------------|-------------|
| L Banks STS                 | 0.034            | -0.073        | -0.026        | 0.012        | -0.050        | -0.002        | -1.127        | 940         | 1081        |
| R Banks STS                 | 0.002            | -0.102        | -0.037        | 0.012        | -0.061        | -0.013        | -1.525        | 1005        | 1129        |
| L Caudal anterior cingulate | 0.551            | 0.023         | 0.011         | 0.018        | -0.025        | 0.047         | 0.421         | 1026        | 1169        |
| R Caudal anterior cingulate | 0.581            | -0.021        | -0.009        | 0.017        | -0.042        | 0.023         | -0.372        | 1025        | 1173        |
| L Caudal middle frontal     | 0.034            | -0.078        | -0.022        | 0.010        | -0.042        | -0.002        | -0.905        | 1034        | 1167        |
| R Caudal middle frontal     | 0.159            | -0.052        | -0.014        | 0.010        | -0.034        | 0.006         | -0.597        | 1034        | 1167        |
| L Cuneus                    | 0.787            | 0.010         | 0.003         | 0.009        | -0.016        | 0.021         | 0.145         | 939         | 1118        |
| R Cuneus                    | 0.342            | -0.031        | -0.009        | 0.010        | -0.029        | 0.010         | -0.519        | 929         | 1085        |
| L Entorhinal                | 0.797            | -0.010        | -0.006        | 0.022        | -0.049        | 0.038         | -0.176        | 1017        | 1163        |
| R Entorhinal                | 0.127            | -0.049        | -0.036        | 0.024        | -0.082        | 0.010         | -1.057        | 1011        | 1145        |
| L Frontal pole              | 0.647            | -0.018        | -0.008        | 0.018        | -0.043        | 0.027         | -0.308        | 1031        | 1169        |
| R Frontal pole              | 0.183            | -0.051        | -0.024        | 0.018        | -0.058        | 0.011         | -0.898        | 1030        | 1171        |
| L Fusiform                  | 0.006            | -0.093        | -0.029        | 0.010        | -0.049        | -0.008        | -1.114        | 1012        | 1170        |
| R Fusiform                  | <0.001           | -0.101        | -0.041        | 0.012        | -0.065        | -0.017        | -1.552        | 1019        | 1172        |
| L Inferior parietal         | 0.022            | -0.081        | -0.021        | 0.009        | -0.039        | -0.003        | -0.928        | 1006        | 1128        |
| <b>R Inferior parietal</b>  | <b>&lt;0.001</b> | <b>-0.119</b> | <b>-0.035</b> | <b>0.010</b> | <b>-0.053</b> | <b>-0.016</b> | <b>-1.480</b> | <b>1004</b> | <b>1153</b> |
| L Inferior temporal         | 0.003            | -0.102        | -0.031        | 0.011        | -0.052        | -0.011        | -1.176        | 991         | 1110        |
| R Inferior temporal         | 0.021            | -0.075        | -0.025        | 0.011        | -0.046        | -0.004        | -0.925        | 1007        | 1129        |
| L Insula                    | 0.149            | -0.055        | -0.017        | 0.012        | -0.041        | 0.006         | -0.600        | 1031        | 1168        |

|                              |                  |               |               |              |               |               |               |             |             |
|------------------------------|------------------|---------------|---------------|--------------|---------------|---------------|---------------|-------------|-------------|
| R Insula                     | 0.282            | -0.038        | -0.014        | 0.013        | -0.040        | 0.012         | -0.491        | 1028        | 1163        |
| L Isthmus cingulate          | 0.011            | -0.096        | -0.033        | 0.013        | -0.058        | -0.007        | -1.383        | 1031        | 1173        |
| R Isthmus cingulate          | 0.022            | -0.083        | -0.030        | 0.013        | -0.055        | -0.004        | -1.277        | 1031        | 1175        |
| L Lateral occipital          | 0.008            | -0.098        | -0.025        | 0.009        | -0.043        | -0.006        | -1.168        | 1006        | 1151        |
| R Lateral occipital          | 0.003            | -0.105        | -0.030        | 0.010        | -0.049        | -0.010        | -1.370        | 1007        | 1157        |
| L Lateral orbitofrontal      | 0.011            | -0.087        | -0.027        | 0.011        | -0.048        | -0.006        | -1.068        | 1025        | 1168        |
| R Lateral orbitofrontal      | 0.164            | -0.044        | -0.015        | 0.011        | -0.036        | 0.006         | -0.599        | 1026        | 1169        |
| L Lingual                    | 0.614            | -0.018        | -0.004        | 0.009        | -0.021        | 0.013         | -0.229        | 998         | 1158        |
| R Lingual                    | 0.420            | -0.026        | -0.007        | 0.009        | -0.025        | 0.011         | -0.373        | 981         | 1126        |
| L Medial orbitofrontal       | 0.222            | -0.045        | -0.013        | 0.011        | -0.034        | 0.008         | -0.565        | 1019        | 1166        |
| R Medial orbitofrontal       | 0.981            | -0.001        | <0.001        | 0.012        | -0.023        | 0.022         | -0.012        | 1022        | 1165        |
| L Middle temporal            | 0.012            | -0.089        | -0.029        | 0.012        | -0.052        | -0.006        | -1.096        | 943         | 1096        |
| R Middle temporal            | 0.049            | -0.063        | -0.022        | 0.011        | -0.044        | <0.001        | -0.818        | 1005        | 1136        |
| L Paracentral                | 0.461            | -0.026        | -0.008        | 0.011        | -0.031        | 0.014         | -0.373        | 1028        | 1170        |
| R Paracentral                | 0.403            | -0.029        | -0.010        | 0.011        | -0.032        | 0.013         | -0.417        | 1026        | 1173        |
| L Parahippocampal            | 0.007            | -0.104        | -0.053        | 0.020        | -0.092        | -0.015        | -2.036        | 1030        | 1169        |
| <b>R Parahippocampal</b>     | <b>&lt;0.001</b> | <b>-0.156</b> | <b>-0.073</b> | <b>0.017</b> | <b>-0.106</b> | <b>-0.039</b> | <b>-2.801</b> | <b>1030</b> | <b>1173</b> |
| L Pars opercularis           | 0.741            | -0.011        | -0.003        | 0.010        | -0.022        | 0.016         | -0.135        | 1025        | 1174        |
| R Pars opercularis           | 0.987            | -0.001        | <0.001        | 0.010        | -0.021        | 0.020         | -0.007        | 1023        | 1172        |
| L Pars orbitalis             | 0.233            | -0.044        | -0.016        | 0.013        | -0.042        | 0.010         | -0.618        | 1025        | 1171        |
| R Pars orbitalis             | 0.766            | 0.011         | 0.004         | 0.013        | -0.022        | 0.030         | 0.155         | 1024        | 1172        |
| L Pars triangularis          | 0.650            | -0.016        | -0.005        | 0.010        | -0.024        | 0.015         | -0.198        | 1023        | 1174        |
| R Pars triangularis          | 0.648            | 0.016         | 0.004         | 0.010        | -0.015        | 0.024         | 0.195         | 1022        | 1173        |
| L Pericalcarine              | 0.897            | -0.004        | -0.001        | 0.009        | -0.020        | 0.017         | -0.078        | 940         | 1124        |
| R Pericalcarine              | 0.565            | 0.017         | 0.006         | 0.010        | -0.014        | 0.025         | 0.361         | 912         | 1070        |
| L Postcentral                | 0.093            | -0.057        | -0.014        | 0.009        | -0.031        | 0.002         | -0.728        | 995         | 1130        |
| R Postcentral                | 0.079            | -0.057        | -0.015        | 0.009        | -0.032        | 0.002         | -0.779        | 996         | 1134        |
| L Posterior cingulate        | 0.026            | -0.079        | -0.025        | 0.011        | -0.047        | -0.003        | -1.040        | 1032        | 1173        |
| R Posterior cingulate        | 0.055            | -0.065        | -0.022        | 0.011        | -0.044        | <0.001        | -0.915        | 1031        | 1174        |
| L Precentral                 | 0.039            | -0.073        | -0.023        | 0.011        | -0.044        | -0.001        | -0.946        | 1018        | 1126        |
| R Precentral                 | 0.163            | -0.050        | -0.016        | 0.011        | -0.038        | 0.006         | -0.663        | 1021        | 1131        |
| <b>L Precuneus</b>           | <b>&lt;0.001</b> | <b>-0.111</b> | <b>-0.031</b> | <b>0.009</b> | <b>-0.049</b> | <b>-0.013</b> | <b>-1.393</b> | <b>1033</b> | <b>1173</b> |
| <b>R Precuneus</b>           | <b>&lt;0.001</b> | <b>-0.132</b> | <b>-0.038</b> | <b>0.009</b> | <b>-0.056</b> | <b>-0.019</b> | <b>-1.673</b> | <b>1032</b> | <b>1174</b> |
| L Rostral anterior cingulate | 0.159            | -0.053        | -0.022        | 0.016        | -0.054        | 0.009         | -0.821        | 1022        | 1164        |
| R Rostral anterior cingulate | 0.507            | -0.023        | -0.011        | 0.016        | -0.042        | 0.021         | -0.399        | 1025        | 1164        |
| L Rostral middle frontal     | 0.441            | -0.025        | -0.007        | 0.009        | -0.023        | 0.010         | -0.293        | 1026        | 1170        |
| R Rostral middle frontal     | 0.351            | 0.028         | 0.009         | 0.009        | -0.009        | 0.026         | 0.384         | 1026        | 1168        |
| L Superior frontal           | 0.019            | -0.083        | -0.023        | 0.010        | -0.042        | -0.004        | -0.896        | 1012        | 1163        |
| R Superior frontal           | 0.046            | -0.067        | -0.019        | 0.010        | -0.038        | <0.001        | -0.748        | 1012        | 1163        |
| L Superior parietal          | 0.117            | -0.052        | -0.014        | 0.009        | -0.032        | 0.004         | -0.684        | 1003        | 1150        |
| R Superior parietal          | 0.001            | -0.102        | -0.030        | 0.009        | -0.048        | -0.012        | -1.453        | 1017        | 1161        |
| L Superior temporal          | 0.004            | -0.101        | -0.032        | 0.011        | -0.054        | -0.010        | -1.245        | 904         | 1070        |
| R Superior temporal          | 0.009            | -0.078        | -0.029        | 0.011        | -0.050        | -0.007        | -1.098        | 979         | 1114        |
| L Supramarginal              | 0.007            | -0.096        | -0.027        | 0.010        | -0.046        | -0.007        | -1.124        | 997         | 1118        |
| R Supramarginal              | 0.002            | -0.105        | -0.030        | 0.010        | -0.049        | -0.011        | -1.252        | 1005        | 1148        |
| L Temporal pole              | 0.157            | -0.055        | -0.031        | 0.022        | -0.073        | 0.012         | -0.862        | 971         | 1150        |
| R Temporal pole              | 0.127            | -0.052        | -0.034        | 0.022        | -0.078        | 0.010         | -0.934        | 999         | 1142        |
| L Transverse temporal        | 0.807            | -0.009        | -0.004        | 0.015        | -0.032        | 0.025         | -0.164        | 1036        | 1174        |
| R Transverse temporal        | 0.043            | -0.060        | -0.032        | 0.016        | -0.064        | -0.001        | -1.417        | 1035        | 1175        |

### Supplementary Table 6b: Cortical surface area results - PD (MoCA group) vs controls

| ROI                         | <i>p</i> | <i>d</i> | <i>b</i> | SE    | Lower CI | Upper CI | % diff | NPD  | NHC  |
|-----------------------------|----------|----------|----------|-------|----------|----------|--------|------|------|
| L Banks STS                 | 0.855    | -0.008   | -1.77    | 9.64  | -20.68   | 17.14    | -0.18  | 940  | 1069 |
| R Banks STS                 | 0.884    | -0.006   | -1.20    | 8.20  | -17.27   | 14.88    | -0.13  | 1005 | 1131 |
| L Caudal anterior cingulate | 0.109    | 0.066    | 13.06    | 8.14  | -2.91    | 29.03    | 2.09   | 1026 | 1168 |
| R Caudal anterior cingulate | 0.569    | -0.023   | -5.38    | 9.43  | -23.87   | 13.11    | -0.71  | 1025 | 1172 |
| L Caudal middle frontal     | 0.109    | 0.066    | 30.80    | 19.22 | -6.90    | 68.49    | 1.39   | 1035 | 1165 |
| R Caudal middle frontal     | 0.538    | 0.026    | 11.94    | 19.38 | -26.05   | 49.94    | 0.58   | 1035 | 1166 |
| L Cuneus                    | 0.396    | -0.036   | -10.13   | 11.93 | -33.53   | 13.27    | -0.70  | 939  | 1110 |
| R Cuneus                    | 0.014    | -0.105   | -30.82   | 12.50 | -55.33   | -6.30    | -2.05  | 929  | 1063 |
| L Entorhinal                | 0.195    | 0.054    | 6.77     | 5.22  | -3.46    | 16.99    | 1.63   | 1017 | 1162 |
| R Entorhinal                | 0.593    | 0.022    | 2.59     | 4.85  | -6.93    | 12.11    | 0.73   | 1012 | 1143 |
| L Frontal pole              | 0.444    | -0.028   | -1.54    | 2.02  | -5.50    | 2.41     | -0.73  | 1031 | 1169 |
| R Frontal pole              | 0.599    | 0.020    | 1.37     | 2.61  | -3.74    | 6.48     | 0.50   | 1030 | 1171 |
| L Fusiform                  | 0.599    | 0.021    | 11.06    | 21.02 | -30.17   | 52.29    | 0.35   | 1013 | 1170 |
| R Fusiform                  | 0.110    | -0.063   | -32.71   | 20.44 | -72.80   | 7.39     | -1.07  | 1018 | 1171 |
| L Inferior parietal         | 0.485    | -0.028   | -22.44   | 32.16 | -85.51   | 40.63    | -0.50  | 1006 | 1127 |
| R Inferior parietal         | 0.699    | 0.016    | 14.34    | 37.05 | -58.31   | 87.00    | 0.27   | 1004 | 1153 |
| L Inferior temporal         | 0.453    | -0.030   | -19.03   | 25.39 | -68.82   | 30.75    | -0.59  | 991  | 1107 |
| R Inferior temporal         | 0.627    | -0.020   | -11.28   | 23.18 | -56.73   | 34.18    | -0.37  | 1007 | 1128 |
| L Insula                    | 0.044    | 0.075    | 26.28    | 13.05 | 0.68     | 51.87    | 1.20   | 1031 | 1160 |
| R Insula                    | 0.938    | -0.003   | -1.19    | 15.23 | -31.06   | 28.68    | -0.05  | 1028 | 1156 |
| L Isthmus cingulate         | 0.170    | 0.055    | 12.60    | 9.19  | -5.42    | 30.62    | 1.26   | 1031 | 1171 |
| R Isthmus cingulate         | 0.728    | 0.014    | 2.97     | 8.56  | -13.81   | 19.76    | 0.32   | 1031 | 1173 |
| L Lateral occipital         | 0.114    | -0.063   | -51.56   | 32.62 | -115.54  | 12.43    | -1.09  | 1006 | 1151 |
| R Lateral occipital         | 0.425    | -0.032   | -27.21   | 34.11 | -94.10   | 39.68    | -0.59  | 1007 | 1155 |
| L Lateral orbitofrontal     | 0.168    | 0.056    | 20.85    | 15.11 | -8.79    | 50.49    | 0.82   | 1026 | 1168 |
| R Lateral orbitofrontal     | 0.020    | 0.093    | 38.82    | 16.73 | 6.01     | 71.63    | 1.57   | 1027 | 1170 |
| L Lingual                   | 0.463    | -0.030   | -17.56   | 23.89 | -64.41   | 29.30    | -0.59  | 998  | 1155 |
| R Lingual                   | 0.200    | -0.052   | -30.90   | 24.12 | -78.19   | 16.40    | -1.02  | 981  | 1118 |
| L Medial orbitofrontal      | 0.360    | 0.037    | 11.45    | 12.51 | -13.07   | 35.98    | 0.63   | 1018 | 1160 |
| R Medial orbitofrontal      | 0.361    | 0.036    | 10.10    | 11.06 | -11.60   | 31.80    | 0.56   | 1021 | 1160 |
| L Middle temporal           | 0.044    | -0.083   | -44.83   | 22.21 | -88.38   | -1.28    | -1.49  | 943  | 1087 |
| R Middle temporal           | 0.846    | -0.008   | -4.22    | 21.82 | -47.01   | 38.56    | -0.13  | 1005 | 1136 |
| L Paracentral               | 0.010    | 0.106    | 25.70    | 10.02 | 6.05     | 45.36    | 1.93   | 1028 | 1169 |
| R Paracentral               | 0.506    | 0.027    | 7.95     | 11.94 | -15.47   | 31.38    | 0.53   | 1026 | 1172 |
| L Parahippocampal           | 0.406    | 0.034    | 4.79     | 5.76  | -6.50    | 16.08    | 0.71   | 1030 | 1170 |
| R Parahippocampal           | 0.065    | 0.075    | 9.90     | 5.35  | -0.60    | 20.40    | 1.51   | 1030 | 1173 |
| L Pars opercularis          | 0.819    | 0.009    | 3.15     | 13.72 | -23.76   | 30.06    | 0.20   | 1025 | 1172 |
| R Pars opercularis          | 0.272    | -0.045   | -12.98   | 11.82 | -36.16   | 10.20    | -0.96  | 1023 | 1168 |
| L Pars orbitalis            | 0.145    | 0.058    | 6.60     | 4.53  | -2.29    | 15.50    | 1.07   | 1025 | 1171 |
| R Pars orbitalis            | 0.053    | 0.078    | 11.05    | 5.71  | -0.16    | 22.25    | 1.47   | 1024 | 1172 |
| L Pars triangularis         | 0.073    | 0.075    | 18.66    | 10.40 | -1.74    | 39.06    | 1.52   | 1023 | 1173 |
| R Pars triangularis         | 0.696    | 0.016    | 4.97     | 12.72 | -19.98   | 29.93    | 0.35   | 1022 | 1170 |

|                              |       |        |        |       |         |        |       |      |      |
|------------------------------|-------|--------|--------|-------|---------|--------|-------|------|------|
| L Pericalcarine              | 0.544 | -0.025 | -8.97  | 14.77 | -37.94  | 20.01  | -0.66 | 940  | 1113 |
| R Pericalcarine              | 0.070 | -0.077 | -27.99 | 15.44 | -58.26  | 2.29   | -1.89 | 912  | 1044 |
| L Postcentral                | 0.272 | -0.046 | -26.23 | 23.86 | -73.03  | 20.56  | -0.63 | 995  | 1132 |
| R Postcentral                | 0.265 | -0.047 | -26.47 | 23.73 | -73.00  | 20.06  | -0.67 | 996  | 1136 |
| L Posterior cingulate        | 0.452 | 0.031  | 8.42   | 11.21 | -13.56  | 30.40  | 0.74  | 1032 | 1169 |
| R Posterior cingulate        | 0.968 | 0.002  | 0.41   | 10.11 | -19.41  | 20.23  | 0.04  | 1031 | 1172 |
| L Precentral                 | 0.623 | -0.020 | -12.99 | 26.45 | -64.87  | 38.88  | -0.27 | 1018 | 1126 |
| R Precentral                 | 0.148 | 0.060  | 38.56  | 26.66 | -13.72  | 90.83  | 0.80  | 1021 | 1134 |
| L Precuneus                  | 0.993 | <0.001 | 0.21   | 23.99 | -46.83  | 47.25  | 0.01  | 1033 | 1171 |
| R Precuneus                  | 0.043 | 0.081  | 50.73  | 25.06 | 1.59    | 99.87  | 1.33  | 1032 | 1172 |
| L Rostral anterior cingulate | 0.262 | 0.046  | 10.38  | 9.24  | -7.74   | 28.50  | 1.26  | 1022 | 1141 |
| R Rostral anterior cingulate | 0.387 | -0.033 | -6.90  | 7.98  | -22.55  | 8.75   | -1.03 | 1025 | 1157 |
| L Rostral middle frontal     | 0.404 | -0.033 | -31.04 | 37.15 | -103.89 | 41.81  | -0.57 | 1026 | 1171 |
| R Rostral middle frontal     | 0.623 | -0.019 | -19.16 | 39.00 | -95.64  | 57.31  | -0.34 | 1026 | 1168 |
| L Superior frontal           | 0.857 | 0.007  | 7.25   | 40.20 | -71.58  | 86.08  | 0.10  | 1013 | 1149 |
| R Superior frontal           | 0.205 | 0.051  | 51.07  | 40.30 | -27.96  | 130.10 | 0.76  | 1012 | 1161 |
| L Superior parietal          | 0.460 | -0.031 | -24.90 | 33.71 | -91.01  | 41.20  | -0.47 | 1003 | 1150 |
| R Superior parietal          | 0.859 | -0.007 | -5.84  | 32.82 | -70.20  | 58.52  | -0.11 | 1017 | 1160 |
| L Superior temporal          | 0.647 | -0.019 | -10.78 | 23.56 | -56.98  | 35.42  | -0.29 | 904  | 1062 |
| R Superior temporal          | 0.464 | 0.030  | 14.68  | 20.04 | -24.62  | 53.97  | 0.42  | 979  | 1113 |
| L Supramarginal              | 0.399 | 0.035  | 26.27  | 31.16 | -34.83  | 87.37  | 0.69  | 997  | 1116 |
| R Supramarginal              | 0.702 | 0.016  | 10.51  | 27.52 | -43.46  | 64.49  | 0.29  | 1005 | 1149 |
| L Temporal pole              | 0.017 | -0.097 | -9.12  | 3.80  | -16.59  | -1.66  | -1.92 | 971  | 1150 |
| R Temporal pole              | 0.730 | 0.014  | 1.35   | 3.90  | -6.31   | 9.00   | 0.32  | 999  | 1141 |
| L Transverse temporal        | 0.206 | 0.051  | 5.62   | 4.44  | -3.09   | 14.33  | 1.25  | 1036 | 1174 |
| R Transverse temporal        | 0.842 | 0.008  | 0.61   | 3.04  | -5.35   | 6.57   | 0.18  | 1035 | 1176 |

Results of cortical surface area analysis of PD patients with MoCA scores vs healthy controls. L – Left, R – Right, ROI – region of interest. Banks STS – Banks of the superior temporal sulcus. **Boldface** denotes significant results after Bonferroni correction

### Supplementary Table 6c: PD (MoCA group) vs controls – subcortical volumes results

| ROI                 | <i>p</i>     | <i>d</i>      | <i>b</i>      | SE           | Lower CI      | Upper CI      | % diff       | NPD         |
|---------------------|--------------|---------------|---------------|--------------|---------------|---------------|--------------|-------------|
| <b>L Amygdala</b>   | <b>0.002</b> | <b>-0.110</b> | <b>-41.39</b> | <b>13.56</b> | <b>-67.99</b> | <b>-14.79</b> | <b>-2.78</b> | <b>1047</b> |
| R Amygdala          | 0.211        | -0.044        | -17.61        | 14.09        | -45.24        | 10.02         | -1.11        | 1049        |
| L Caudate nucleus   | 0.754        | 0.012         | 9.00          | 28.71        | -47.29        | 65.30         | 0.26         | 1044        |
| R Caudate nucleus   | 0.603        | 0.020         | 15.28         | 29.35        | -42.28        | 72.84         | 0.44         | 1045        |
| L Globus pallidus   | 0.027        | 0.073         | 34.92         | 15.81        | 3.92          | 65.92         | 2.33         | 1023        |
| R Globus pallidus   | 0.016        | 0.081         | 34.93         | 14.44        | 6.61          | 63.25         | 2.30         | 1040        |
| L Hippocampus       | 0.370        | 0.033         | 24.94         | 27.79        | -29.55        | 79.43         | 0.64         | 1033        |
| R Hippocampus       | 0.964        | 0.002         | 1.29          | 28.57        | -54.75        | 57.32         | 0.03         | 1046        |
| L Lateral ventricle | 0.945        | 0.003         | 28.59         | 414.90       | -785.06       | 842.25        | 0.21         | 1051        |
| R Lateral ventricle | 0.319        | 0.041         | 376.05        | 376.93       | -363.14       | 1115.23       | 3.04         | 1051        |
| L Nucleus accumbens | 0.097        | -0.059        | -11.72        | 7.06         | -25.56        | 2.13          | -2.45        | 1048        |
| R Nucleus accumbens | 0.614        | -0.019        | -3.38         | 6.69         | -16.49        | 9.74          | -0.68        | 1049        |
| L Putamen           | 0.015        | -0.089        | -94.81        | 39.06        | -171.41       | -18.20        | -1.88        | 1024        |
| R Putamen           | 0.006        | -0.102        | -103.34       | 37.67        | -177.21       | -29.47        | -2.13        | 1039        |
| L Thalamus          | 0.004        | 0.098         | 133.47        | 46.19        | 42.89         | 224.05        | 1.86         | 1009        |
| R Thalamus          | 0.025        | 0.080         | 87.50         | 39.06        | 10.90         | 164.10        | 1.31         | 1023        |



### Supplementary Table 7a: Cortical thickness results - HY1 PD vs HY2 PD

| ROI                         | <i>p</i> | <i>d</i> | <i>b</i> | SE    | Lower CI | Upper CI | % diff | NPD  | NHC |
|-----------------------------|----------|----------|----------|-------|----------|----------|--------|------|-----|
| L Banks STS                 | 0.874    | 0.008    | 0.002    | 0.012 | -0.022   | 0.026    | 0.086  | 919  | 386 |
| R Banks STS                 | 0.767    | -0.014   | -0.004   | 0.013 | -0.028   | 0.021    | -0.156 | 1003 | 421 |
| L Caudal anterior cingulate | 0.871    | 0.008    | 0.003    | 0.018 | -0.032   | 0.037    | 0.110  | 1046 | 436 |
| R Caudal anterior cingulate | 0.734    | -0.017   | -0.005   | 0.016 | -0.037   | 0.026    | -0.224 | 1046 | 434 |
| L Caudal middle frontal     | 0.576    | 0.028    | 0.006    | 0.011 | -0.015   | 0.027    | 0.247  | 1051 | 433 |
| R Caudal middle frontal     | 0.696    | -0.020   | -0.004   | 0.011 | -0.025   | 0.017    | -0.176 | 1048 | 433 |
| L Cuneus                    | 0.375    | -0.044   | -0.008   | 0.009 | -0.026   | 0.010    | -0.469 | 980  | 407 |
| R Cuneus                    | 0.462    | -0.034   | -0.007   | 0.010 | -0.026   | 0.012    | -0.393 | 953  | 403 |
| L Entorhinal                | 0.761    | -0.016   | -0.007   | 0.022 | -0.050   | 0.036    | -0.207 | 1028 | 428 |
| R Entorhinal                | 0.688    | -0.017   | -0.009   | 0.023 | -0.055   | 0.037    | -0.282 | 998  | 421 |
| L Frontal pole              | 0.835    | -0.011   | -0.004   | 0.018 | -0.038   | 0.031    | -0.138 | 1053 | 432 |
| R Frontal pole              | 0.278    | -0.055   | -0.019   | 0.017 | -0.053   | 0.015    | -0.725 | 1052 | 433 |
| L Fusiform                  | 0.494    | -0.033   | -0.007   | 0.011 | -0.029   | 0.014    | -0.291 | 1038 | 429 |
| R Fusiform                  | 0.366    | -0.036   | -0.011   | 0.012 | -0.035   | 0.013    | -0.427 | 1047 | 433 |
| L Inferior parietal         | 0.532    | -0.031   | -0.006   | 0.010 | -0.025   | 0.013    | -0.264 | 1015 | 429 |
| R Inferior parietal         | 0.991    | -0.001   | <0.001   | 0.010 | -0.019   | 0.019    | -0.005 | 1018 | 424 |
| L Inferior temporal         | 0.686    | 0.020    | 0.005    | 0.011 | -0.018   | 0.027    | 0.176  | 1020 | 412 |
| R Inferior temporal         | 0.702    | -0.017   | -0.004   | 0.012 | -0.027   | 0.018    | -0.166 | 1025 | 426 |
| L Insula                    | 0.400    | -0.045   | -0.011   | 0.013 | -0.035   | 0.014    | -0.362 | 1052 | 433 |
| R Insula                    | 0.308    | -0.047   | -0.014   | 0.013 | -0.040   | 0.013    | -0.476 | 1043 | 432 |
| L Isthmus cingulate         | 0.231    | -0.061   | -0.015   | 0.013 | -0.040   | 0.010    | -0.652 | 1052 | 436 |
| R Isthmus cingulate         | 0.771    | -0.014   | -0.004   | 0.013 | -0.029   | 0.022    | -0.165 | 1047 | 435 |
| L Lateral occipital         | 0.480    | -0.035   | -0.007   | 0.009 | -0.025   | 0.012    | -0.317 | 1036 | 423 |
| R Lateral occipital         | 0.286    | -0.053   | -0.011   | 0.010 | -0.030   | 0.009    | -0.496 | 1035 | 429 |
| L Lateral orbitofrontal     | 0.818    | 0.011    | 0.002    | 0.011 | -0.019   | 0.024    | 0.099  | 1055 | 429 |
| R Lateral orbitofrontal     | 0.235    | -0.051   | -0.013   | 0.011 | -0.034   | 0.008    | -0.522 | 1051 | 431 |
| L Lingual                   | 0.268    | -0.053   | -0.009   | 0.008 | -0.026   | 0.007    | -0.488 | 1020 | 429 |
| R Lingual                   | 0.122    | -0.066   | -0.013   | 0.009 | -0.030   | 0.004    | -0.679 | 996  | 420 |
| L Medial orbitofrontal      | 0.980    | -0.001   | <0.001   | 0.011 | -0.022   | 0.021    | -0.012 | 1042 | 428 |
| R Medial orbitofrontal      | 0.500    | -0.030   | -0.008   | 0.011 | -0.030   | 0.015    | -0.335 | 1037 | 428 |
| L Middle temporal           | 0.295    | -0.052   | -0.012   | 0.012 | -0.035   | 0.011    | -0.461 | 960  | 389 |
| R Middle temporal           | 0.604    | -0.024   | -0.006   | 0.012 | -0.029   | 0.017    | -0.227 | 1018 | 420 |
| L Paracentral               | 0.987    | 0.001    | <0.001   | 0.012 | -0.023   | 0.023    | 0.009  | 1047 | 435 |
| R Paracentral               | 0.855    | -0.009   | -0.002   | 0.012 | -0.025   | 0.021    | -0.095 | 1040 | 433 |
| L Parahippocampal           | 0.131    | -0.076   | -0.029   | 0.019 | -0.067   | 0.009    | -1.133 | 1055 | 435 |
| R Parahippocampal           | 0.620    | -0.024   | -0.008   | 0.017 | -0.041   | 0.024    | -0.324 | 1044 | 434 |
| L Pars opercularis          | 0.742    | -0.016   | -0.003   | 0.010 | -0.023   | 0.017    | -0.140 | 1053 | 437 |
| R Pars opercularis          | 0.974    | -0.001   | <0.001   | 0.010 | -0.021   | 0.020    | -0.014 | 1052 | 436 |
| L Pars orbitalis            | 0.580    | -0.028   | -0.007   | 0.013 | -0.032   | 0.018    | -0.274 | 1050 | 428 |
| R Pars orbitalis            | 0.182    | -0.065   | -0.017   | 0.013 | -0.041   | 0.008    | -0.663 | 1048 | 430 |

|                              |       |        |        |       |        |        |        |      |     |
|------------------------------|-------|--------|--------|-------|--------|--------|--------|------|-----|
| L Pars triangularis          | 0.682 | 0.020  | 0.004  | 0.010 | -0.016 | 0.024  | 0.182  | 1053 | 428 |
| R Pars triangularis          | 0.919 | -0.005 | -0.001 | 0.010 | -0.021 | 0.019  | -0.044 | 1045 | 430 |
| L Pericalcarine              | 0.020 | -0.105 | -0.021 | 0.009 | -0.039 | -0.003 | -1.346 | 976  | 414 |
| R Pericalcarine              | 0.217 | -0.052 | -0.012 | 0.010 | -0.031 | 0.007  | -0.762 | 935  | 398 |
| L Postcentral                | 0.998 | <0.001 | <0.001 | 0.009 | -0.017 | 0.017  | 0.001  | 1002 | 407 |
| R Postcentral                | 0.764 | -0.013 | -0.003 | 0.009 | -0.020 | 0.015  | -0.136 | 996  | 412 |
| L Posterior cingulate        | 0.815 | -0.011 | -0.003 | 0.011 | -0.024 | 0.019  | -0.108 | 1054 | 437 |
| R Posterior cingulate        | 0.346 | -0.042 | -0.010 | 0.011 | -0.031 | 0.011  | -0.435 | 1054 | 437 |
| L Precentral                 | 0.465 | 0.036  | 0.008  | 0.012 | -0.014 | 0.031  | 0.357  | 1010 | 415 |
| R Precentral                 | 0.939 | 0.004  | 0.001  | 0.012 | -0.022 | 0.024  | 0.038  | 1008 | 424 |
| L Precuneus                  | 0.501 | -0.031 | -0.006 | 0.010 | -0.025 | 0.012  | -0.292 | 1053 | 433 |
| R Precuneus                  | 0.294 | -0.049 | -0.010 | 0.010 | -0.029 | 0.009  | -0.454 | 1050 | 434 |
| L Rostral anterior cingulate | 0.540 | 0.031  | 0.010  | 0.016 | -0.022 | 0.042  | 0.368  | 1040 | 429 |
| R Rostral anterior cingulate | 0.959 | -0.002 | -0.001 | 0.016 | -0.033 | 0.031  | -0.032 | 1038 | 431 |
| L Rostral middle frontal     | 0.553 | 0.027  | 0.005  | 0.009 | -0.012 | 0.022  | 0.228  | 1042 | 427 |
| R Rostral middle frontal     | 0.348 | -0.038 | -0.009 | 0.009 | -0.026 | 0.009  | -0.381 | 1048 | 430 |
| L Superior frontal           | 0.894 | 0.007  | 0.001  | 0.010 | -0.018 | 0.021  | 0.052  | 1025 | 426 |
| R Superior frontal           | 0.450 | -0.034 | -0.007 | 0.010 | -0.027 | 0.012  | -0.295 | 1026 | 426 |
| L Superior parietal          | 0.251 | -0.054 | -0.011 | 0.009 | -0.029 | 0.008  | -0.521 | 1019 | 419 |
| R Superior parietal          | 0.564 | -0.025 | -0.005 | 0.009 | -0.024 | 0.013  | -0.263 | 1023 | 429 |
| L Superior temporal          | 0.679 | -0.021 | -0.005 | 0.012 | -0.028 | 0.018  | -0.186 | 903  | 381 |
| R Superior temporal          | 0.189 | -0.055 | -0.015 | 0.011 | -0.037 | 0.007  | -0.567 | 958  | 407 |
| L Supramarginal              | 0.632 | -0.024 | -0.005 | 0.010 | -0.025 | 0.015  | -0.209 | 1000 | 416 |
| R Supramarginal              | 0.364 | -0.044 | -0.009 | 0.010 | -0.029 | 0.011  | -0.389 | 1013 | 422 |
| L Temporal pole              | 0.285 | -0.057 | -0.024 | 0.023 | -0.069 | 0.020  | -0.686 | 1004 | 416 |
| R Temporal pole              | 0.142 | -0.071 | -0.034 | 0.023 | -0.079 | 0.011  | -0.938 | 1001 | 419 |
| L Transverse temporal        | 0.110 | -0.083 | -0.023 | 0.014 | -0.051 | 0.005  | -1.047 | 1058 | 437 |
| R Transverse temporal        | 0.070 | -0.071 | -0.028 | 0.016 | -0.059 | 0.002  | -1.255 | 1057 | 438 |

Results of cortical surface area analysis of PD patients with MoCA scores vs healthy controls. L – Left, R – Right, ROI – region of interest. Banks STS – Banks of the superior temporal sulcus. **Boldface** denotes significant results after Bonferroni correction

## Supplementary Table 7b: Cortical thickness results - HY2 PD vs HY3PD

| ROI                         | <i>p</i>         | <i>d</i>      | <i>b</i>      | SE           | Lower CI      | Upper CI      | % diff        | NPD        | NHC         |
|-----------------------------|------------------|---------------|---------------|--------------|---------------|---------------|---------------|------------|-------------|
| L Banks STS                 | 0.005            | -0.165        | -0.042        | 0.015        | -0.071        | -0.013        | -1.831        | 229        | 919         |
| R Banks STS                 | 0.013            | -0.145        | -0.038        | 0.015        | -0.068        | -0.008        | -1.581        | 241        | 1003        |
| L Caudal anterior cingulate | 0.356            | -0.058        | -0.020        | 0.022        | -0.064        | 0.023         | -0.778        | 257        | 1046        |
| R Caudal anterior cingulate | 0.644            | -0.029        | -0.009        | 0.020        | -0.049        | 0.030         | -0.377        | 258        | 1046        |
| L Caudal middle frontal     | 0.053            | -0.116        | -0.025        | 0.013        | -0.049        | <0.001        | -1.027        | 259        | 1051        |
| R Caudal middle frontal     | 0.046            | -0.125        | -0.026        | 0.013        | -0.052        | <0.001        | -1.098        | 257        | 1048        |
| L Cuneus                    | 0.045            | -0.126        | -0.025        | 0.012        | -0.049        | -0.001        | -1.407        | 225        | 980         |
| R Cuneus                    | 0.049            | -0.110        | -0.024        | 0.012        | -0.048        | <0.001        | -1.348        | 230        | 953         |
| L Entorhinal                | 0.008            | -0.165        | -0.071        | 0.027        | -0.123        | -0.019        | -2.206        | 259        | 1028        |
| R Entorhinal                | 0.019            | -0.124        | -0.070        | 0.030        | -0.128        | -0.012        | -2.103        | 244        | 998         |
| L Frontal pole              | 0.367            | -0.059        | -0.019        | 0.022        | -0.062        | 0.023         | -0.731        | 260        | 1053        |
| R Frontal pole              | 0.474            | -0.044        | -0.016        | 0.022        | -0.058        | 0.027         | -0.600        | 257        | 1052        |
| L Fusiform                  | 0.002            | -0.186        | -0.042        | 0.013        | -0.069        | -0.016        | -1.661        | 254        | 1038        |
| R Fusiform                  | 0.013            | -0.123        | -0.038        | 0.015        | -0.068        | -0.008        | -1.477        | 255        | 1047        |
| <b>L Inferior parietal</b>  | <b>&lt;0.001</b> | <b>-0.233</b> | <b>-0.047</b> | <b>0.012</b> | <b>-0.070</b> | <b>-0.023</b> | <b>-2.054</b> | <b>250</b> | <b>1015</b> |
| R Inferior parietal         | 0.005            | -0.159        | -0.034        | 0.012        | -0.058        | -0.010        | -1.469        | 252        | 1018        |

|                                 |                  |               |               |              |               |               |               |            |             |
|---------------------------------|------------------|---------------|---------------|--------------|---------------|---------------|---------------|------------|-------------|
| L Inferior temporal             | 0.003            | -0.183        | -0.043        | 0.014        | -0.071        | -0.015        | -1.627        | 234        | 1020        |
| R Inferior temporal             | 0.166            | -0.079        | -0.020        | 0.014        | -0.048        | 0.008         | -0.749        | 242        | 1025        |
| L Insula                        | 0.905            | -0.008        | -0.002        | 0.015        | -0.031        | 0.028         | -0.062        | 255        | 1052        |
| R Insula                        | 0.980            | 0.001         | <0.001        | 0.016        | -0.032        | 0.033         | 0.015         | 256        | 1043        |
| L Isthmus cingulate             | 0.016            | -0.151        | -0.037        | 0.015        | -0.067        | -0.007        | -1.611        | 259        | 1052        |
| R Isthmus cingulate             | 0.061            | -0.114        | -0.030        | 0.016        | -0.062        | 0.001         | -1.325        | 258        | 1047        |
| L Lateral occipital             | 0.015            | -0.148        | -0.029        | 0.012        | -0.052        | -0.006        | -1.389        | 248        | 1036        |
| R Lateral occipital             | 0.011            | -0.154        | -0.031        | 0.012        | -0.056        | -0.007        | -1.476        | 252        | 1035        |
| L Lateral orbitofrontal         | 0.016            | -0.141        | -0.032        | 0.013        | -0.058        | -0.006        | -1.267        | 260        | 1055        |
| R Lateral orbitofrontal         | 0.310            | -0.053        | -0.014        | 0.013        | -0.040        | 0.013         | -0.553        | 259        | 1051        |
| L Lingual                       | 0.002            | -0.185        | -0.034        | 0.011        | -0.055        | -0.013        | -1.766        | 244        | 1020        |
| R Lingual                       | 0.035            | -0.112        | -0.024        | 0.011        | -0.046        | -0.002        | -1.219        | 245        | 996         |
| L Medial orbitofrontal          | 0.979            | 0.002         | <0.001        | 0.013        | -0.026        | 0.027         | 0.015         | 256        | 1042        |
| R Medial orbitofrontal          | 0.961            | -0.003        | -0.001        | 0.014        | -0.028        | 0.027         | -0.030        | 256        | 1037        |
| <b>L Middle temporal</b>        | <b>&lt;0.001</b> | <b>-0.237</b> | <b>-0.055</b> | <b>0.014</b> | <b>-0.083</b> | <b>-0.027</b> | <b>-2.073</b> | <b>231</b> | <b>960</b>  |
| R Middle temporal               | 0.007            | -0.155        | -0.038        | 0.014        | -0.066        | -0.011        | -1.438        | 251        | 1018        |
| L Paracentral                   | 0.056            | -0.113        | -0.028        | 0.015        | -0.057        | 0.001         | -1.272        | 257        | 1047        |
| R Paracentral                   | 0.101            | -0.098        | -0.024        | 0.015        | -0.053        | 0.005         | -1.068        | 254        | 1040        |
| L Parahippocampal               | 0.133            | -0.093        | -0.036        | 0.024        | -0.082        | 0.011         | -1.411        | 259        | 1055        |
| R Parahippocampal               | 0.002            | -0.188        | -0.065        | 0.021        | -0.106        | -0.025        | -2.599        | 258        | 1044        |
| L Pars opercularis              | 0.048            | -0.117        | -0.024        | 0.012        | -0.048        | <0.001        | -1.014        | 259        | 1053        |
| R Pars opercularis              | 0.251            | -0.067        | -0.014        | 0.012        | -0.039        | 0.010         | -0.593        | 259        | 1052        |
| L Pars orbitalis                | 0.179            | -0.082        | -0.021        | 0.016        | -0.052        | 0.010         | -0.836        | 260        | 1050        |
| R Pars orbitalis                | 0.678            | 0.025         | 0.006         | 0.015        | -0.024        | 0.037         | 0.254         | 258        | 1048        |
| L Pars triangularis             | 0.004            | -0.172        | -0.036        | 0.013        | -0.061        | -0.012        | -1.593        | 260        | 1053        |
| R Pars triangularis             | 0.459            | -0.044        | -0.009        | 0.012        | -0.033        | 0.015         | -0.395        | 259        | 1045        |
| L Pericalcarine                 | 0.349            | -0.055        | -0.011        | 0.012        | -0.035        | 0.012         | -0.732        | 219        | 976         |
| R Pericalcarine                 | 0.109            | -0.086        | -0.021        | 0.013        | -0.046        | 0.005         | -1.300        | 222        | 935         |
| L Postcentral                   | 0.075            | -0.101        | -0.019        | 0.011        | -0.040        | 0.002         | -0.970        | 248        | 1002        |
| R Postcentral                   | 0.135            | -0.080        | -0.016        | 0.011        | -0.038        | 0.005         | -0.849        | 244        | 996         |
| L Posterior cingulate           | 0.142            | -0.091        | -0.020        | 0.014        | -0.048        | 0.007         | -0.861        | 259        | 1054        |
| R Posterior cingulate           | 0.006            | -0.154        | -0.037        | 0.013        | -0.063        | -0.010        | -1.571        | 259        | 1054        |
| L Precentral                    | 0.017            | -0.140        | -0.033        | 0.014        | -0.061        | -0.006        | -1.413        | 246        | 1010        |
| R Precentral                    | 0.042            | -0.120        | -0.029        | 0.014        | -0.056        | -0.001        | -1.226        | 247        | 1008        |
| <b>L Precuneus</b>              | <b>&lt;0.001</b> | <b>-0.207</b> | <b>-0.042</b> | <b>0.012</b> | <b>-0.066</b> | <b>-0.019</b> | <b>-1.920</b> | <b>257</b> | <b>1053</b> |
| R Precuneus                     | 0.003            | -0.176        | -0.036        | 0.012        | -0.059        | -0.012        | -1.605        | 258        | 1050        |
| L Rostral anterior cingulate    | 0.361            | -0.060        | -0.018        | 0.020        | -0.056        | 0.020         | -0.649        | 257        | 1040        |
| R Rostral anterior cingulate    | 0.019            | 0.140         | 0.048         | 0.020        | 0.008         | 0.088         | 1.790         | 255        | 1038        |
| <b>L Rostral middle frontal</b> | <b>0.001</b>     | <b>-0.197</b> | <b>-0.038</b> | <b>0.011</b> | <b>-0.059</b> | <b>-0.016</b> | <b>-1.672</b> | <b>258</b> | <b>1042</b> |
| R Rostral middle frontal        | 0.193            | -0.068        | -0.015        | 0.011        | -0.037        | 0.007         | -0.663        | 259        | 1048        |
| L Superior frontal              | 0.014            | -0.153        | -0.030        | 0.012        | -0.054        | -0.006        | -1.183        | 252        | 1025        |
| R Superior frontal              | 0.034            | -0.121        | -0.025        | 0.012        | -0.049        | -0.002        | -1.011        | 251        | 1026        |
| L Superior parietal             | 0.006            | -0.156        | -0.032        | 0.012        | -0.055        | -0.009        | -1.565        | 244        | 1019        |
| R Superior parietal             | 0.008            | -0.145        | -0.031        | 0.012        | -0.055        | -0.008        | -1.538        | 247        | 1023        |
| <b>L Superior temporal</b>      | <b>0.001</b>     | <b>-0.214</b> | <b>-0.050</b> | <b>0.014</b> | <b>-0.078</b> | <b>-0.022</b> | <b>-1.940</b> | <b>212</b> | <b>903</b>  |
| R Superior temporal             | 0.024            | -0.115        | -0.030        | 0.013        | -0.057        | -0.004        | -1.188        | 239        | 958         |
| L Supramarginal                 | 0.001            | -0.201        | -0.042        | 0.012        | -0.066        | -0.017        | -1.771        | 246        | 1000        |
| R Supramarginal                 | 0.005            | -0.170        | -0.035        | 0.012        | -0.060        | -0.011        | -1.492        | 250        | 1013        |
| L Temporal pole                 | 0.847            | -0.013        | -0.005        | 0.028        | -0.061        | 0.050         | -0.155        | 238        | 1004        |
| R Temporal pole                 | 0.195            | -0.077        | -0.037        | 0.029        | -0.093        | 0.019         | -1.038        | 241        | 1001        |

|                       |              |               |               |              |               |                  |               |            |             |
|-----------------------|--------------|---------------|---------------|--------------|---------------|------------------|---------------|------------|-------------|
| L Transverse temporal | 0.336        | -0.059        | -0.017        | 0.017        | -0.051        | 0.017            | -0.779        | 260        | 1058        |
| R Transverse temporal | <b>0.050</b> | <b>-0.093</b> | <b>-0.037</b> | <b>0.019</b> | <b>-0.075</b> | <b>&lt;0.001</b> | <b>-1.686</b> | <b>259</b> | <b>1057</b> |

Results of cortical surface area analysis of PD patients with MoCA scores vs healthy controls. L – Left, R – Right, ROI – region of interest. Banks STS – Banks of the superior temporal sulcus. **Boldface** denotes significant results after Bonferroni correction

### Supplementary Table 7c: Cortical thickness results - HY3 PD vs HY4&5 PD

| ROI                         | <i>p</i> | <i>d</i> | <i>b</i> | SE    | Lower CI | Upper CI | % diff | NPD | NHC |
|-----------------------------|----------|----------|----------|-------|----------|----------|--------|-----|-----|
| L Banks STS                 | 0.028    | -0.229   | -0.055   | 0.025 | -0.103   | -0.006   | -2.461 | 73  | 229 |
| R Banks STS                 | 0.630    | -0.048   | -0.011   | 0.023 | -0.057   | 0.035    | -0.487 | 76  | 241 |
| L Caudal anterior cingulate | 0.600    | 0.059    | 0.020    | 0.039 | -0.056   | 0.096    | 0.766  | 80  | 257 |
| R Caudal anterior cingulate | 0.106    | -0.182   | -0.059   | 0.036 | -0.130   | 0.013    | -2.321 | 81  | 258 |
| L Caudal middle frontal     | 0.182    | -0.136   | -0.028   | 0.021 | -0.069   | 0.013    | -1.184 | 81  | 259 |
| R Caudal middle frontal     | 0.771    | 0.030    | 0.007    | 0.023 | -0.038   | 0.051    | 0.282  | 81  | 257 |
| L Cuneus                    | 0.476    | 0.078    | 0.015    | 0.021 | -0.026   | 0.056    | 0.861  | 74  | 225 |
| R Cuneus                    | 0.659    | 0.039    | 0.009    | 0.020 | -0.030   | 0.047    | 0.489  | 73  | 230 |
| L Entorhinal                | 0.915    | 0.012    | 0.005    | 0.044 | -0.083   | 0.092    | 0.154  | 81  | 259 |
| R Entorhinal                | 0.834    | -0.018   | -0.010   | 0.048 | -0.105   | 0.085    | -0.321 | 81  | 244 |
| L Frontal pole              | 0.312    | -0.124   | -0.036   | 0.035 | -0.105   | 0.034    | -1.345 | 81  | 260 |
| R Frontal pole              | 0.006    | -0.295   | -0.094   | 0.034 | -0.161   | -0.027   | -3.607 | 81  | 257 |
| L Fusiform                  | 0.104    | -0.155   | -0.033   | 0.020 | -0.073   | 0.007    | -1.331 | 81  | 254 |
| R Fusiform                  | 0.081    | -0.136   | -0.044   | 0.025 | -0.093   | 0.005    | -1.726 | 79  | 255 |
| L Inferior parietal         | 0.431    | -0.078   | -0.016   | 0.020 | -0.056   | 0.024    | -0.735 | 78  | 250 |
| R Inferior parietal         | 0.148    | -0.138   | -0.031   | 0.021 | -0.072   | 0.011    | -1.369 | 80  | 252 |
| L Inferior temporal         | 0.176    | -0.144   | -0.031   | 0.023 | -0.076   | 0.014    | -1.201 | 79  | 234 |
| R Inferior temporal         | 0.066    | -0.165   | -0.039   | 0.021 | -0.080   | 0.003    | -1.482 | 79  | 242 |
| L Insula                    | 0.175    | -0.161   | -0.031   | 0.023 | -0.076   | 0.014    | -1.082 | 81  | 255 |
| R Insula                    | 0.008    | -0.243   | -0.070   | 0.027 | -0.123   | -0.018   | -2.504 | 81  | 256 |
| L Isthmus cingulate         | 0.148    | -0.162   | -0.036   | 0.025 | -0.085   | 0.013    | -1.600 | 81  | 259 |
| R Isthmus cingulate         | 0.649    | -0.048   | -0.012   | 0.026 | -0.064   | 0.040    | -0.534 | 81  | 258 |
| L Lateral occipital         | 0.286    | 0.108    | 0.022    | 0.020 | -0.018   | 0.061    | 1.056  | 76  | 248 |
| R Lateral occipital         | 0.381    | -0.094   | -0.018   | 0.021 | -0.059   | 0.022    | -0.857 | 78  | 252 |
| L Lateral orbitofrontal     | 0.237    | -0.121   | -0.025   | 0.021 | -0.065   | 0.016    | -0.994 | 81  | 260 |
| R Lateral orbitofrontal     | 0.003    | -0.244   | -0.060   | 0.020 | -0.099   | -0.020   | -2.433 | 81  | 259 |
| L Lingual                   | 0.602    | -0.051   | -0.009   | 0.017 | -0.043   | 0.025    | -0.488 | 77  | 244 |
| R Lingual                   | 0.647    | -0.040   | -0.009   | 0.020 | -0.048   | 0.030    | -0.467 | 75  | 245 |
| L Medial orbitofrontal      | 0.034    | -0.250   | -0.046   | 0.022 | -0.089   | -0.004   | -1.958 | 81  | 256 |
| R Medial orbitofrontal      | 0.002    | -0.284   | -0.067   | 0.021 | -0.109   | -0.026   | -2.882 | 81  | 256 |
| L Middle temporal           | 0.168    | -0.146   | -0.031   | 0.022 | -0.074   | 0.013    | -1.191 | 75  | 231 |
| R Middle temporal           | 0.016    | -0.222   | -0.050   | 0.020 | -0.090   | -0.009   | -1.901 | 80  | 251 |
| L Paracentral               | 0.728    | 0.034    | 0.008    | 0.023 | -0.038   | 0.054    | 0.372  | 81  | 257 |
| R Paracentral               | 0.922    | -0.010   | -0.002   | 0.024 | -0.051   | 0.046    | -0.108 | 81  | 254 |
| L Parahippocampal           | 0.778    | -0.032   | -0.011   | 0.040 | -0.090   | 0.068    | -0.462 | 80  | 259 |
| R Parahippocampal           | 0.898    | -0.014   | -0.004   | 0.035 | -0.073   | 0.064    | -0.187 | 81  | 258 |
| L Pars opercularis          | 0.040    | -0.211   | -0.040   | 0.019 | -0.078   | -0.002   | -1.704 | 81  | 259 |
| R Pars opercularis          | 0.298    | -0.100   | -0.021   | 0.020 | -0.061   | 0.019    | -0.883 | 81  | 259 |
| L Pars orbitalis            | 0.071    | -0.198   | -0.051   | 0.028 | -0.105   | 0.004    | -2.019 | 81  | 260 |

|                              |       |        |        |       |        |        |        |    |     |
|------------------------------|-------|--------|--------|-------|--------|--------|--------|----|-----|
| R Pars orbitalis             | 0.013 | -0.272 | -0.067 | 0.027 | -0.119 | -0.014 | -2.648 | 80 | 258 |
| L Pars triangularis          | 0.974 | -0.003 | -0.001 | 0.021 | -0.041 | 0.040  | -0.030 | 80 | 260 |
| R Pars triangularis          | 0.451 | -0.076 | -0.016 | 0.022 | -0.059 | 0.026  | -0.721 | 81 | 259 |
| L Pericalcarine              | 0.614 | -0.057 | -0.012 | 0.023 | -0.058 | 0.034  | -0.768 | 74 | 219 |
| R Pericalcarine              | 0.530 | 0.056  | 0.014  | 0.022 | -0.029 | 0.056  | 0.873  | 69 | 222 |
| L Postcentral                | 0.041 | -0.200 | -0.036 | 0.018 | -0.071 | -0.002 | -1.877 | 79 | 248 |
| R Postcentral                | 0.204 | -0.107 | -0.023 | 0.018 | -0.058 | 0.012  | -1.217 | 80 | 244 |
| L Posterior cingulate        | 0.466 | -0.082 | -0.017 | 0.023 | -0.062 | 0.028  | -0.711 | 81 | 259 |
| R Posterior cingulate        | 0.079 | -0.157 | -0.038 | 0.022 | -0.081 | 0.004  | -1.661 | 81 | 259 |
| L Precentral                 | 0.249 | -0.108 | -0.025 | 0.021 | -0.066 | 0.017  | -1.058 | 79 | 246 |
| R Precentral                 | 0.950 | 0.006  | 0.001  | 0.022 | -0.042 | 0.044  | 0.060  | 80 | 247 |
| L Precuneus                  | 0.651 | -0.044 | -0.010 | 0.021 | -0.051 | 0.032  | -0.443 | 80 | 257 |
| R Precuneus                  | 0.565 | -0.054 | -0.011 | 0.019 | -0.047 | 0.026  | -0.495 | 81 | 258 |
| L Rostral anterior cingulate | 0.258 | -0.132 | -0.034 | 0.030 | -0.094 | 0.025  | -1.245 | 81 | 257 |
| R Rostral anterior cingulate | 0.285 | -0.106 | -0.037 | 0.034 | -0.105 | 0.031  | -1.352 | 81 | 255 |
| L Rostral middle frontal     | 0.662 | -0.043 | -0.008 | 0.019 | -0.045 | 0.029  | -0.369 | 81 | 258 |
| R Rostral middle frontal     | 0.008 | -0.242 | -0.057 | 0.021 | -0.098 | -0.015 | -2.528 | 80 | 259 |
| L Superior frontal           | 0.932 | 0.009  | 0.002  | 0.019 | -0.036 | 0.039  | 0.065  | 80 | 252 |
| R Superior frontal           | 0.868 | 0.016  | 0.003  | 0.019 | -0.034 | 0.040  | 0.127  | 80 | 251 |
| L Superior parietal          | 0.922 | -0.009 | -0.002 | 0.020 | -0.042 | 0.038  | -0.100 | 81 | 244 |
| R Superior parietal          | 0.680 | -0.035 | -0.008 | 0.020 | -0.047 | 0.030  | -0.404 | 81 | 247 |
| L Superior temporal          | 0.221 | -0.136 | -0.028 | 0.023 | -0.072 | 0.017  | -1.114 | 74 | 212 |
| R Superior temporal          | 0.145 | -0.121 | -0.031 | 0.021 | -0.072 | 0.011  | -1.233 | 77 | 239 |
| L Supramarginal              | 0.312 | -0.097 | -0.020 | 0.020 | -0.058 | 0.019  | -0.862 | 81 | 246 |
| R Supramarginal              | 0.026 | -0.216 | -0.045 | 0.020 | -0.085 | -0.005 | -1.954 | 80 | 250 |
| L Temporal pole              | 0.058 | -0.236 | -0.079 | 0.041 | -0.160 | 0.003  | -2.252 | 78 | 238 |
| R Temporal pole              | 0.119 | -0.148 | -0.068 | 0.043 | -0.153 | 0.017  | -1.925 | 80 | 241 |
| L Transverse temporal        | 0.040 | -0.205 | -0.057 | 0.028 | -0.112 | -0.003 | -2.768 | 81 | 260 |
| R Transverse temporal        | 0.581 | -0.038 | -0.018 | 0.032 | -0.081 | 0.045  | -0.834 | 80 | 259 |

Results of cortical surface area analysis of PD patients with MoCA scores vs healthy controls. L – Left, R – Right, ROI – region of interest. Banks STS – Banks of the superior temporal sulcus. **Boldface** denotes significant results after Bonferroni correction

### Supplementary Table 7d: Cortical surface area results - HY1 PD vs HY2 PD

| ROI                         | <i>p</i> | <i>d</i> | <i>b</i> | SE    | Lower CI | Upper CI | % diff | NPD  | NHC |
|-----------------------------|----------|----------|----------|-------|----------|----------|--------|------|-----|
| L Banks STS                 | 0.086    | 0.100    | 16.49    | 9.58  | -2.31    | 35.29    | 1.666  | 917  | 386 |
| R Banks STS                 | 0.096    | 0.090    | 13.67    | 8.21  | -2.43    | 29.77    | 1.499  | 1004 | 420 |
| L Caudal anterior cingulate | 0.202    | 0.070    | 10.29    | 8.06  | -5.52    | 26.10    | 1.624  | 1045 | 435 |
| R Caudal anterior cingulate | 0.786    | -0.015   | -2.51    | 9.25  | -20.65   | 15.64    | -0.328 | 1043 | 433 |
| L Caudal middle frontal     | 0.265    | -0.060   | -22.01   | 19.75 | -60.75   | 16.73    | -0.974 | 1050 | 432 |
| R Caudal middle frontal     | 0.649    | -0.025   | -8.96    | 19.64 | -47.49   | 29.58    | -0.431 | 1050 | 433 |
| L Cuneus                    | 0.346    | -0.054   | -11.66   | 12.36 | -35.91   | 12.58    | -0.813 | 980  | 407 |
| R Cuneus                    | 0.686    | 0.023    | 5.02     | 12.43 | -19.37   | 29.42    | 0.340  | 950  | 403 |
| L Entorhinal                | 0.791    | 0.015    | 1.40     | 5.30  | -8.99    | 11.80    | 0.343  | 1028 | 428 |
| R Entorhinal                | 0.278    | 0.060    | 5.27     | 4.86  | -4.26    | 14.81    | 1.503  | 998  | 422 |
| L Frontal pole              | 0.565    | 0.029    | 1.14     | 1.99  | -2.76    | 5.04     | 0.563  | 1052 | 431 |
| R Frontal pole              | 0.046    | 0.104    | 5.13     | 2.57  | 0.09     | 10.16    | 1.892  | 1053 | 432 |
| L Fusiform                  | 0.955    | -0.003   | -1.22    | 21.88 | -44.15   | 41.70    | -0.039 | 1038 | 428 |
| R Fusiform                  | 0.380    | -0.047   | -19.20   | 21.85 | -62.07   | 23.67    | -0.624 | 1045 | 433 |
| L Inferior parietal         | 0.948    | -0.003   | -2.10    | 32.48 | -65.81   | 61.61    | -0.047 | 1015 | 429 |
| R Inferior parietal         | 0.445    | -0.042   | -27.98   | 36.66 | -99.91   | 43.94    | -0.526 | 1020 | 424 |

|                              |                  |               |                |              |                |               |               |             |            |
|------------------------------|------------------|---------------|----------------|--------------|----------------|---------------|---------------|-------------|------------|
| L Inferior temporal          | 0.201            | -0.070        | -33.26         | 26.00        | -84.27         | 17.75         | -1.030        | 1022        | 412        |
| R Inferior temporal          | 0.883            | -0.008        | -3.42          | 23.25        | -49.03         | 42.18         | -0.112        | 1025        | 426        |
| L Insula                     | 0.573            | 0.028         | 7.18           | 12.74        | -17.82         | 32.17         | 0.327         | 1052        | 433        |
| R Insula                     | 0.597            | 0.027         | 7.90           | 14.95        | -21.42         | 37.22         | 0.352         | 1043        | 432        |
| L Isthmus cingulate          | 0.381            | -0.047        | -8.56          | 9.78         | -27.74         | 10.61         | -0.831        | 1052        | 436        |
| R Isthmus cingulate          | 0.721            | -0.019        | -3.20          | 8.94         | -20.74         | 14.35         | -0.337        | 1047        | 435        |
| L Lateral occipital          | 0.197            | -0.068        | -42.45         | 32.87        | -106.93        | 22.04         | -0.897        | 1037        | 424        |
| R Lateral occipital          | 0.353            | -0.050        | -31.14         | 33.54        | -96.95         | 34.66         | -0.677        | 1036        | 429        |
| L Lateral orbitofrontal      | 0.323            | -0.055        | -15.09         | 15.27        | -45.04         | 14.87         | -0.589        | 1054        | 429        |
| R Lateral orbitofrontal      | 0.039            | -0.111        | -34.30         | 16.63        | -66.92         | -1.68         | -1.358        | 1050        | 431        |
| <b>L Lingual</b>             | <b>&lt;0.001</b> | <b>-0.224</b> | <b>-100.88</b> | <b>24.42</b> | <b>-148.78</b> | <b>-52.98</b> | <b>-3.329</b> | <b>1019</b> | <b>429</b> |
| R Lingual                    | 0.008            | -0.145        | -64.58         | 24.34        | -112.34        | -16.82        | -2.129        | 995         | 421        |
| L Medial orbitofrontal       | 0.937            | 0.004         | 1.01           | 12.79        | -24.07         | 26.10         | 0.055         | 1042        | 428        |
| R Medial orbitofrontal       | 0.790            | -0.014        | -2.93          | 11.03        | -24.56         | 18.70         | -0.163        | 1038        | 428        |
| L Middle temporal            | 0.987            | -0.001        | -0.35          | 21.40        | -42.34         | 41.63         | -0.012        | 960         | 389        |
| R Middle temporal            | 0.623            | 0.026         | 10.60          | 21.58        | -31.72         | 52.92         | 0.323         | 1018        | 420        |
| L Paracentral                | 0.808            | 0.013         | 2.51           | 10.31        | -17.72         | 22.74         | 0.185         | 1046        | 435        |
| R Paracentral                | 0.748            | 0.017         | 4.05           | 12.61        | -20.69         | 28.78         | 0.265         | 1041        | 433        |
| L Parahippocampal            | 0.873            | 0.009         | 1.00           | 6.24         | -11.25         | 13.25         | 0.146         | 1054        | 434        |
| R Parahippocampal            | 0.437            | 0.042         | 4.59           | 5.91         | -7.00          | 16.18         | 0.691         | 1043        | 433        |
| L Pars opercularis           | 0.961            | -0.003        | -0.69          | 14.03        | -28.20         | 26.83         | -0.043        | 1053        | 438        |
| R Pars opercularis           | 0.046            | -0.111        | -24.83         | 12.41        | -49.18         | -0.48         | -1.819        | 1053        | 436        |
| L Pars orbitalis             | 0.468            | -0.039        | -3.29          | 4.53         | -12.18         | 5.60          | -0.533        | 1049        | 428        |
| R Pars orbitalis             | 0.971            | -0.002        | -0.21          | 5.74         | -11.46         | 11.05         | -0.027        | 1050        | 430        |
| L Pars triangularis          | 0.399            | -0.047        | -9.03          | 10.70        | -30.02         | 11.96         | -0.725        | 1053        | 428        |
| R Pars triangularis          | 0.330            | -0.053        | -13.53         | 13.88        | -40.76         | 13.70         | -0.942        | 1046        | 430        |
| L Pericalcarine              | 0.012            | -0.141        | -35.32         | 14.02        | -62.82         | -7.82         | -2.588        | 975         | 414        |
| R Pericalcarine              | 0.011            | -0.145        | -38.45         | 15.12        | -68.11         | -8.79         | -2.590        | 934         | 398        |
| L Postcentral                | 0.727            | 0.019         | 8.84           | 25.30        | -40.78         | 58.46         | 0.214         | 1002        | 407        |
| R Postcentral                | 0.074            | 0.101         | 45.13          | 25.26        | -4.42          | 94.68         | 1.147         | 994         | 412        |
| L Posterior cingulate        | 0.741            | 0.018         | 4.32           | 13.08        | -21.34         | 29.98         | 0.376         | 1056        | 437        |
| R Posterior cingulate        | 0.655            | 0.023         | 4.54           | 10.14        | -15.36         | 24.43         | 0.388         | 1053        | 438        |
| L Precentral                 | 0.539            | 0.033         | 16.69          | 27.14        | -36.55         | 69.93         | 0.344         | 1009        | 415        |
| R Precentral                 | 0.540            | 0.032         | 17.48          | 28.50        | -38.42         | 73.38         | 0.358         | 1009        | 424        |
| L Precuneus                  | 0.436            | 0.042         | 18.78          | 24.11        | -28.51         | 66.06         | 0.510         | 1053        | 434        |
| R Precuneus                  | 0.210            | 0.067         | 32.78          | 26.14        | -18.50         | 84.06         | 0.850         | 1050        | 434        |
| L Rostral anterior cingulate | 0.169            | 0.075         | 12.44          | 9.03         | -5.28          | 30.16         | 1.514         | 1036        | 428        |
| R Rostral anterior cingulate | 0.720            | -0.019        | -2.84          | 7.91         | -18.35         | 12.68         | -0.422        | 1040        | 431        |
| L Rostral middle frontal     | 0.070            | -0.095        | -68.83         | 37.97        | -143.31        | 5.65          | -1.257        | 1042        | 427        |
| R Rostral middle frontal     | 0.241            | -0.062        | -45.96         | 39.22        | -122.89        | 30.97         | -0.811        | 1050        | 430        |
| L Superior frontal           | 0.072            | -0.093        | -70.79         | 39.29        | -147.86        | 6.28          | -1.007        | 1026        | 426        |
| R Superior frontal           | 0.451            | -0.040        | -29.90         | 39.66        | -107.71        | 47.90         | -0.439        | 1027        | 426        |
| L Superior parietal          | 0.267            | -0.060        | -37.68         | 33.92        | -104.22        | 28.86         | -0.713        | 1019        | 419        |
| R Superior parietal          | 0.305            | -0.055        | -34.65         | 33.78        | -100.91        | 31.61         | -0.652        | 1021        | 429        |
| L Superior temporal          | 0.544            | 0.033         | 14.38          | 23.67        | -32.06         | 60.83         | 0.391         | 902         | 381        |
| R Superior temporal          | 0.121            | 0.083         | 31.74          | 20.43        | -8.34          | 71.81         | 0.903         | 958         | 407        |
| L Supramarginal              | 0.670            | -0.023        | -12.85         | 30.18        | -72.06         | 46.36         | -0.337        | 1001        | 415        |
| R Supramarginal              | 0.300            | 0.056         | 28.85          | 27.85        | -25.79         | 83.50         | 0.803         | 1016        | 423        |
| L Temporal pole              | 0.581            | -0.031        | -2.05          | 3.72         | -9.35          | 5.24          | -0.437        | 1005        | 416        |
| R Temporal pole              | 0.920            | -0.005        | -0.39          | 3.89         | -8.02          | 7.24          | -0.092        | 1000        | 419        |

|                       |       |       |      |      |       |       |       |      |     |
|-----------------------|-------|-------|------|------|-------|-------|-------|------|-----|
| L Transverse temporal | 0.644 | 0.025 | 2.03 | 4.39 | -6.58 | 10.64 | 0.446 | 1058 | 437 |
| R Transverse temporal | 0.885 | 0.008 | 0.46 | 3.17 | -5.76 | 6.68  | 0.135 | 1056 | 438 |

Results of cortical surface area analysis of PD patients with MoCA scores vs healthy controls. L – Left, R – Right, ROI – region of interest. Banks STS – Banks of the superior temporal sulcus. **Boldface** denotes significant results after Bonferroni correction

### Supplementary Table 7e: Cortical surface area results - HY2 PD vs HY3 PD

| ROI                         | <i>p</i>         | <i>d</i>      | <i>b</i>       | SE           | Lower CI       | Upper CI      | % diff       | NPD        | NHC         |
|-----------------------------|------------------|---------------|----------------|--------------|----------------|---------------|--------------|------------|-------------|
| L Banks STS                 | 0.003            | -0.209        | -35.13         | 11.77        | -58.22         | -12.05        | -3.49        | 230        | 917         |
| R Banks STS                 | 0.002            | -0.203        | -31.58         | 10.27        | -51.73         | -11.44        | -3.43        | 240        | 1004        |
| L Caudal anterior cingulate | 0.040            | -0.137        | -20.94         | 10.19        | -40.94         | -0.95         | -3.27        | 258        | 1045        |
| R Caudal anterior cingulate | 0.408            | -0.055        | -9.50          | 11.50        | -32.06         | 13.05         | -1.24        | 258        | 1043        |
| L Caudal middle frontal     | 0.153            | -0.094        | -35.41         | 24.77        | -84.01         | 13.18         | -1.58        | 258        | 1050        |
| R Caudal middle frontal     | 0.059            | -0.127        | -46.72         | 24.71        | -95.19         | 1.76          | -2.26        | 256        | 1050        |
| L Cuneus                    | 0.810            | -0.017        | -3.71          | 15.39        | -33.91         | 26.49         | -0.26        | 225        | 980         |
| R Cuneus                    | 0.032            | -0.152        | -32.51         | 15.16        | -62.25         | -2.76         | -2.20        | 230        | 950         |
| L Entorhinal                | 0.631            | -0.032        | -3.15          | 6.56         | -16.01         | 9.72          | -0.76        | 258        | 1028        |
| R Entorhinal                | 0.134            | -0.101        | -9.21          | 6.14         | -21.26         | 2.85          | -2.58        | 245        | 998         |
| L Frontal pole              | 0.006            | -0.166        | -6.71          | 2.42         | -11.47         | -1.96         | -3.27        | 260        | 1052        |
| R Frontal pole              | 0.135            | -0.091        | -4.72          | 3.15         | -10.90         | 1.47          | -1.70        | 259        | 1053        |
| L Fusiform                  | 0.005            | -0.181        | -76.04         | 27.01        | -129.04        | -23.04        | -2.42        | 254        | 1038        |
| R Fusiform                  | 0.006            | -0.180        | -75.71         | 27.41        | -129.48        | -21.95        | -2.48        | 254        | 1045        |
| L Inferior parietal         | 0.007            | -0.176        | -111.35        | 41.05        | -191.89        | -30.81        | -2.48        | 249        | 1015        |
| R Inferior parietal         | 0.008            | -0.176        | -121.62        | 45.70        | -211.29        | -31.95        | -2.29        | 252        | 1020        |
| L Inferior temporal         | 0.048            | -0.133        | -63.40         | 31.97        | -126.12        | -0.69         | -1.98        | 234        | 1022        |
| R Inferior temporal         | 0.016            | -0.159        | -70.91         | 29.39        | -128.57        | -13.25        | -2.32        | 242        | 1025        |
| L Insula                    | 0.233            | -0.072        | -19.17         | 16.08        | -50.72         | 12.38         | -0.87        | 255        | 1052        |
| R Insula                    | 0.052            | -0.122        | -36.94         | 18.99        | -74.21         | 0.32          | -1.63        | 256        | 1043        |
| L Isthmus cingulate         | 0.848            | -0.012        | -2.32          | 12.15        | -26.15         | 21.51         | -0.23        | 260        | 1052        |
| R Isthmus cingulate         | 0.643            | -0.030        | -5.05          | 10.87        | -26.36         | 16.27         | -0.53        | 257        | 1047        |
| L Lateral occipital         | 0.001            | -0.208        | -131.24        | 41.20        | -212.07        | -50.41        | -2.79        | 248        | 1037        |
| R Lateral occipital         | 0.055            | -0.128        | -80.72         | 41.99        | -163.11        | 1.66          | -1.77        | 252        | 1036        |
| L Lateral orbitofrontal     | 0.420            | -0.053        | -15.44         | 19.15        | -53.02         | 22.13         | -0.61        | 260        | 1054        |
| R Lateral orbitofrontal     | 0.178            | -0.087        | -28.16         | 20.91        | -69.19         | 12.87         | -1.13        | 258        | 1050        |
| L Lingual                   | 0.608            | -0.034        | -15.62         | 30.46        | -75.39         | 44.15         | -0.53        | 243        | 1019        |
| R Lingual                   | 0.119            | -0.103        | -46.61         | 29.91        | -105.29        | 12.07         | -1.57        | 245        | 995         |
| L Medial orbitofrontal      | 0.001            | -0.217        | -52.38         | 15.69        | -83.16         | -21.59        | -2.86        | 256        | 1042        |
| R Medial orbitofrontal      | 0.104            | -0.105        | -22.74         | 13.99        | -50.20         | 4.71          | -1.26        | 256        | 1038        |
| L Middle temporal           | 0.021            | -0.155        | -62.68         | 27.03        | -115.72        | -9.65         | -2.11        | 231        | 960         |
| <b>R Middle temporal</b>    | <b>&lt;0.001</b> | <b>-0.269</b> | <b>-111.87</b> | <b>26.70</b> | <b>-164.26</b> | <b>-59.48</b> | <b>-3.38</b> | <b>251</b> | <b>1018</b> |
| L Paracentral               | 0.904            | -0.008        | -1.58          | 13.14        | -27.37         | 24.21         | -0.12        | 255        | 1046        |
| R Paracentral               | 0.836            | -0.014        | -3.36          | 16.16        | -35.06         | 28.35         | -0.22        | 254        | 1041        |
| L Parahippocampal           | 0.017            | -0.154        | -18.33         | 7.70         | -33.43         | -3.22         | -2.66        | 259        | 1054        |
| R Parahippocampal           | 0.002            | -0.205        | -23.63         | 7.54         | -38.42         | -8.84         | -3.54        | 257        | 1043        |
| L Pars opercularis          | 0.190            | -0.086        | -21.91         | 16.71        | -54.69         | 10.87         | -1.38        | 259        | 1053        |
| R Pars opercularis          | 0.291            | -0.071        | -15.52         | 14.70        | -44.36         | 13.32         | -1.16        | 259        | 1053        |
| L Pars orbitalis            | 0.884            | -0.009        | -0.83          | 5.72         | -12.06         | 10.39         | -0.14        | 260        | 1049        |

|                              |       |        |         |       |         |        |       |     |      |
|------------------------------|-------|--------|---------|-------|---------|--------|-------|-----|------|
| R Pars orbitalis             | 0.015 | -0.160 | -17.36  | 7.09  | -31.28  | -3.44  | -2.29 | 258 | 1050 |
| L Pars triangularis          | 0.819 | 0.015  | 3.04    | 13.32 | -23.09  | 29.18  | 0.25  | 260 | 1053 |
| R Pars triangularis          | 0.595 | -0.035 | -9.03   | 17.01 | -42.40  | 24.34  | -0.64 | 259 | 1046 |
| L Pericalcarine              | 0.684 | 0.029  | 7.94    | 19.54 | -30.40  | 46.28  | 0.60  | 219 | 975  |
| R Pericalcarine              | 0.694 | 0.028  | 7.46    | 18.92 | -29.66  | 44.58  | 0.51  | 222 | 934  |
| L Postcentral                | 0.002 | -0.206 | -97.73  | 31.57 | -159.68 | -35.79 | -2.36 | 248 | 1002 |
| R Postcentral                | 0.127 | -0.104 | -49.14  | 32.20 | -112.32 | 14.04  | -1.23 | 244 | 994  |
| L Posterior cingulate        | 0.134 | -0.099 | -24.70  | 16.48 | -57.03  | 7.63   | -2.14 | 257 | 1056 |
| R Posterior cingulate        | 0.204 | -0.081 | -15.75  | 12.40 | -40.08  | 8.57   | -1.34 | 259 | 1053 |
| L Precentral                 | 0.046 | -0.130 | -69.20  | 34.70 | -137.28 | -1.12  | -1.42 | 246 | 1009 |
| R Precentral                 | 0.009 | -0.169 | -93.78  | 35.72 | -163.86 | -23.70 | -1.92 | 247 | 1009 |
| L Precuneus                  | 0.008 | -0.174 | -78.66  | 29.64 | -136.81 | -20.51 | -2.12 | 258 | 1053 |
| R Precuneus                  | 0.025 | -0.146 | -71.20  | 31.78 | -133.54 | -8.86  | -1.83 | 258 | 1050 |
| L Rostral anterior cingulate | 0.865 | 0.011  | 2.00    | 11.73 | -21.01  | 25.00  | 0.24  | 257 | 1036 |
| R Rostral anterior cingulate | 0.170 | -0.089 | -13.29  | 9.67  | -32.27  | 5.68   | -1.98 | 255 | 1040 |
| L Rostral middle frontal     | 0.059 | -0.119 | -92.27  | 48.82 | -188.05 | 3.51   | -1.70 | 257 | 1042 |
| R Rostral middle frontal     | 0.098 | -0.105 | -80.73  | 48.73 | -176.32 | 14.86  | -1.43 | 259 | 1050 |
| L Superior frontal           | 0.343 | -0.060 | -47.63  | 50.21 | -146.14 | 50.89  | -0.68 | 252 | 1026 |
| R Superior frontal           | 0.116 | -0.101 | -80.88  | 51.35 | -181.63 | 19.87  | -1.20 | 251 | 1027 |
| L Superior parietal          | 0.048 | -0.132 | -84.23  | 42.53 | -167.66 | -0.80  | -1.60 | 244 | 1019 |
| R Superior parietal          | 0.081 | -0.115 | -74.41  | 42.55 | -157.90 | 9.08   | -1.41 | 247 | 1021 |
| L Superior temporal          | 0.300 | -0.071 | -32.22  | 31.08 | -93.20  | 28.76  | -0.87 | 212 | 902  |
| R Superior temporal          | 0.001 | -0.218 | -84.51  | 25.65 | -134.83 | -34.18 | -2.38 | 239 | 958  |
| L Supramarginal              | 0.006 | -0.181 | -106.24 | 38.50 | -181.77 | -30.71 | -2.77 | 245 | 1001 |
| R Supramarginal              | 0.010 | -0.172 | -89.55  | 34.63 | -157.50 | -21.60 | -2.47 | 249 | 1016 |
| L Temporal pole              | 0.284 | -0.074 | -5.04   | 4.70  | -14.26  | 4.18   | -1.08 | 239 | 1005 |
| R Temporal pole              | 0.488 | 0.047  | 3.35    | 4.83  | -6.12   | 12.82  | 0.79  | 242 | 1000 |
| L Transverse temporal        | 0.774 | -0.019 | -1.55   | 5.40  | -12.15  | 9.04   | -0.34 | 259 | 1058 |
| R Transverse temporal        | 0.383 | -0.057 | -3.44   | 3.94  | -11.16  | 4.29   | -1.01 | 259 | 1056 |

Results of cortical surface area analysis of PD patients with MoCA scores vs healthy controls. L – Left, R – Right, ROI – region of interest. Banks STS – Banks of the superior temporal sulcus. **Boldface** denotes significant results after Bonferroni correction

### Supplementary Table 7f: Cortical surface area results - HY3 PD vs HY4&5 PD

| ROI                         | <i>p</i> | <i>d</i> | <i>b</i> | SE    | Lower CI | Upper CI | % diff | NPD | NHC |
|-----------------------------|----------|----------|----------|-------|----------|----------|--------|-----|-----|
| L Banks STS                 | 0.656    | 0.053    | 8.27     | 18.53 | -28.21   | 44.74    | 0.85   | 72  | 230 |
| R Banks STS                 | 0.672    | -0.053   | -7.02    | 16.57 | -39.62   | 25.59    | -0.81  | 77  | 240 |
| L Caudal anterior cingulate | 0.369    | -0.114   | -14.93   | 16.60 | -47.59   | 17.74    | -2.44  | 80  | 258 |
| R Caudal anterior cingulate | 0.577    | -0.070   | -10.59   | 18.94 | -47.86   | 26.68    | -1.46  | 81  | 258 |
| L Caudal middle frontal     | 0.087    | 0.208    | 74.25    | 43.19 | -10.73   | 159.23   | 3.41   | 81  | 258 |
| R Caudal middle frontal     | 0.121    | 0.193    | 67.20    | 43.28 | -17.95   | 152.36   | 3.32   | 80  | 256 |
| L Cuneus                    | 0.101    | 0.222    | 42.51    | 25.83 | -8.35    | 93.37    | 3.02   | 74  | 225 |
| R Cuneus                    | 0.552    | 0.079    | 15.50    | 26.02 | -35.72   | 66.73    | 1.06   | 72  | 230 |
| L Entorhinal                | 0.381    | -0.102   | -9.28    | 10.58 | -30.09   | 11.53    | -2.26  | 81  | 258 |
| R Entorhinal                | 0.581    | 0.068    | 5.68     | 10.29 | -14.56   | 25.92    | 1.60   | 81  | 245 |



|                              |       |        |        |       |         |        |       |    |     |
|------------------------------|-------|--------|--------|-------|---------|--------|-------|----|-----|
| L Frontal pole               | 0.037 | 0.213  | 7.76   | 3.70  | 0.48    | 15.04  | 3.77  | 81 | 260 |
| R Frontal pole               | 0.437 | 0.087  | 4.18   | 5.37  | -6.39   | 14.76  | 1.49  | 81 | 259 |
| L Fusiform                   | 0.641 | 0.053  | 20.16  | 43.20 | -64.84  | 105.16 | 0.66  | 81 | 254 |
| R Fusiform                   | 0.750 | -0.040 | -14.18 | 44.51 | -101.76 | 73.39  | -0.48 | 81 | 254 |
| L Inferior parietal          | 0.983 | -0.003 | -1.51  | 71.94 | -143.08 | 140.06 | -0.04 | 79 | 249 |
| R Inferior parietal          | 0.955 | 0.007  | 4.57   | 80.71 | -154.25 | 163.38 | 0.09  | 81 | 252 |
| L Inferior temporal          | 0.622 | -0.060 | -25.81 | 52.26 | -128.67 | 77.04  | -0.83 | 79 | 234 |
| R Inferior temporal          | 0.494 | 0.084  | 33.16  | 48.41 | -62.12  | 128.43 | 1.12  | 80 | 242 |
| L Insula                     | 0.843 | -0.023 | -6.02  | 30.42 | -65.87  | 53.84  | -0.27 | 81 | 255 |
| R Insula                     | 0.647 | -0.053 | -14.99 | 32.73 | -79.39  | 49.41  | -0.66 | 81 | 256 |
| L Isthmus cingulate          | 0.538 | 0.075  | 12.52  | 20.33 | -27.48  | 52.51  | 1.23  | 80 | 260 |
| R Isthmus cingulate          | 0.066 | 0.213  | 33.59  | 18.20 | -2.22   | 69.40  | 3.56  | 81 | 257 |
| L Lateral occipital          | 0.580 | 0.071  | 37.73  | 68.02 | -96.12  | 171.58 | 0.82  | 76 | 248 |
| R Lateral occipital          | 0.138 | 0.188  | 107.92 | 72.55 | -34.84  | 250.68 | 2.38  | 78 | 252 |
| L Lateral orbitofrontal      | 0.203 | -0.157 | -42.07 | 33.01 | -107.01 | 22.86  | -1.68 | 81 | 260 |
| R Lateral orbitofrontal      | 0.745 | -0.039 | -11.87 | 36.46 | -83.61  | 59.87  | -0.48 | 80 | 258 |
| L Lingual                    | 0.607 | 0.068  | 24.79  | 48.20 | -70.08  | 119.65 | 0.87  | 76 | 243 |
| R Lingual                    | 0.260 | 0.147  | 53.86  | 47.74 | -40.08  | 147.80 | 1.85  | 76 | 245 |
| L Medial orbitofrontal       | 0.854 | -0.022 | -4.70  | 25.61 | -55.08  | 45.68  | -0.26 | 81 | 256 |
| R Medial orbitofrontal       | 0.107 | 0.190  | 39.38  | 24.33 | -8.49   | 87.26  | 2.18  | 81 | 256 |
| L Middle temporal            | 0.394 | 0.108  | 42.06  | 49.26 | -54.90  | 139.01 | 1.46  | 75 | 231 |
| R Middle temporal            | 0.383 | 0.105  | 38.77  | 44.39 | -48.58  | 126.13 | 1.22  | 80 | 251 |
| L Paracentral                | 0.889 | 0.016  | 3.26   | 23.43 | -42.84  | 49.36  | 0.24  | 81 | 255 |
| R Paracentral                | 0.794 | 0.031  | 6.87   | 26.31 | -44.90  | 58.65  | 0.44  | 81 | 254 |
| L Parahippocampal            | 0.455 | 0.094  | 9.17   | 12.26 | -14.95  | 33.28  | 1.40  | 81 | 259 |
| R Parahippocampal            | 0.463 | 0.093  | 8.42   | 11.44 | -14.10  | 30.94  | 1.33  | 81 | 257 |
| L Pars opercularis           | 0.673 | 0.052  | 11.87  | 28.06 | -43.34  | 67.08  | 0.76  | 81 | 259 |
| R Pars opercularis           | 0.343 | -0.120 | -22.73 | 23.92 | -69.80  | 24.34  | -1.75 | 81 | 259 |
| L Pars orbitalis             | 0.643 | -0.054 | -4.59  | 9.89  | -24.05  | 14.86  | -0.74 | 81 | 260 |
| R Pars orbitalis             | 0.731 | -0.042 | -3.97  | 11.55 | -26.70  | 18.76  | -0.53 | 81 | 258 |
| L Pars triangularis          | 0.359 | -0.115 | -19.92 | 21.71 | -62.62  | 22.79  | -1.60 | 80 | 260 |
| R Pars triangularis          | 0.505 | -0.081 | -19.39 | 29.04 | -76.53  | 37.75  | -1.37 | 81 | 259 |
| L Pericalcarine              | 0.356 | 0.126  | 36.74  | 39.71 | -41.43  | 114.92 | 2.80  | 73 | 219 |
| R Pericalcarine              | 0.863 | 0.024  | 5.63   | 32.56 | -58.49  | 69.74  | 0.39  | 69 | 222 |
| L Postcentral                | 0.566 | 0.073  | 29.31  | 51.06 | -71.17  | 129.79 | 0.73  | 79 | 248 |
| R Postcentral                | 0.959 | -0.007 | -2.81  | 54.32 | -109.70 | 104.08 | -0.07 | 80 | 244 |
| L Posterior cingulate        | 0.571 | -0.073 | -11.05 | 19.48 | -49.38  | 27.28  | -0.99 | 81 | 257 |
| R Posterior cingulate        | 0.266 | -0.142 | -22.72 | 20.38 | -62.82  | 17.38  | -1.99 | 79 | 259 |
| L Precentral                 | 0.216 | 0.149  | 80.31  | 64.73 | -47.06  | 207.69 | 1.66  | 79 | 246 |
| R Precentral                 | 0.129 | 0.184  | 91.99  | 60.38 | -26.82  | 210.80 | 1.91  | 80 | 247 |
| L Precuneus                  | 0.723 | -0.045 | -17.22 | 48.51 | -112.66 | 78.22  | -0.48 | 81 | 258 |
| R Precuneus                  | 0.580 | -0.070 | -28.86 | 52.10 | -131.37 | 73.65  | -0.76 | 81 | 258 |
| L Rostral anterior cingulate | 0.418 | -0.100 | -16.96 | 20.93 | -58.14  | 24.22  | -2.04 | 81 | 257 |
| R Rostral anterior cingulate | 0.719 | -0.043 | -5.73  | 15.89 | -37.00  | 25.54  | -0.90 | 81 | 255 |
| L Rostral middle frontal     | 0.352 | 0.109  | 76.97  | 82.61 | -85.58  | 239.52 | 1.43  | 81 | 257 |
| R Rostral middle frontal     | 0.165 | 0.164  | 115.51 | 83.03 | -47.85  | 278.86 | 2.07  | 81 | 259 |
| L Superior frontal           | 0.783 | 0.033  | 25.15  | 91.44 | -154.78 | 205.08 | 0.36  | 80 | 252 |
| R Superior frontal           | 0.580 | 0.066  | 50.34  | 90.97 | -128.67 | 229.34 | 0.76  | 81 | 251 |
| L Superior parietal          | 0.429 | 0.099  | 57.81  | 73.04 | -85.92  | 201.54 | 1.12  | 81 | 244 |
| R Superior parietal          | 0.883 | -0.018 | -10.36 | 70.21 | -148.52 | 127.80 | -0.20 | 81 | 247 |

|                       |       |        |        |       |         |        |       |    |     |
|-----------------------|-------|--------|--------|-------|---------|--------|-------|----|-----|
| L Superior temporal   | 0.984 | 0.003  | 1.03   | 51.30 | -99.99  | 102.04 | 0.03  | 74 | 212 |
| R Superior temporal   | 0.999 | <0.001 | -0.06  | 41.99 | -82.70  | 82.58  | 0.00  | 78 | 239 |
| L Supramarginal       | 0.978 | 0.004  | 1.93   | 68.89 | -133.63 | 137.49 | 0.05  | 81 | 245 |
| R Supramarginal       | 0.583 | -0.071 | -31.00 | 56.33 | -141.84 | 79.85  | -0.87 | 81 | 249 |
| L Temporal pole       | 0.389 | 0.109  | 6.92   | 8.03  | -8.88   | 22.73  | 1.50  | 78 | 239 |
| R Temporal pole       | 0.375 | 0.107  | 7.15   | 8.05  | -8.69   | 22.98  | 1.66  | 80 | 242 |
| L Transverse temporal | 0.340 | 0.119  | 8.64   | 9.05  | -9.15   | 26.44  | 1.91  | 81 | 259 |
| R Transverse temporal | 0.851 | 0.024  | 1.18   | 6.26  | -11.14  | 13.50  | 0.35  | 81 | 259 |

Results of cortical surface area analysis of PD patients with MoCA scores vs healthy controls. L – Left, R – Right, ROI – region of interest. Banks STS – Banks of the superior temporal sulcus. **Boldface** denotes significant results after Bonferroni correction

### Supplementary Table 7g: Subcortical volume results - HY1 PD vs HY2 PD

| ROI                 | <i>p</i> | <i>d</i> | <i>b</i> | SE     | Lower CI | Upper CI | % diff | NPD  |
|---------------------|----------|----------|----------|--------|----------|----------|--------|------|
| <b>L Amygdala</b>   | 0.697    | -0.018   | -4.89    | 12.56  | -29.54   | 19.75    | -0.334 | 1052 |
| R Amygdala          | 0.060    | -0.087   | -25.35   | 13.48  | -51.79   | 1.09     | -1.595 | 1049 |
| L Caudate nucleus   | 0.012    | -0.131   | -70.92   | 28.08  | -126.00  | -15.85   | -2.023 | 1054 |
| R Caudate nucleus   | 0.039    | -0.106   | -57.96   | 28.02  | -112.92  | -2.99    | -1.625 | 1048 |
| L Globus pallidus   | 0.757    | 0.015    | 4.85     | 15.69  | -25.93   | 35.63    | 0.327  | 1017 |
| R Globus pallidus   | 0.263    | 0.056    | 15.58    | 13.90  | -11.69   | 42.84    | 1.048  | 1044 |
| L Hippocampus       | 0.110    | -0.081   | -43.45   | 27.14  | -96.69   | 9.79     | -1.095 | 1034 |
| R Hippocampus       | 0.059    | -0.093   | -51.60   | 27.30  | -105.15  | 1.96     | -1.262 | 1047 |
| L Lateral ventricle | 0.839    | -0.011   | -84.81   | 416.27 | -901.35  | 731.74   | -0.611 | 1063 |
| R Lateral ventricle | 0.762    | -0.017   | -119.76  | 394.62 | -893.84  | 654.33   | -0.919 | 1063 |
| L Nucleus accumbens | 0.887    | 0.007    | 0.95     | 6.68   | -12.15   | 14.06    | 0.198  | 1052 |
| R Nucleus accumbens | 0.443    | -0.037   | -4.93    | 6.43   | -17.54   | 7.67     | -0.990 | 1045 |
| L Putamen           | 0.858    | -0.009   | -6.88    | 38.54  | -82.48   | 68.73    | -0.139 | 1026 |
| R Putamen           | 0.698    | -0.019   | -14.23   | 36.72  | -86.26   | 57.79    | -0.300 | 1051 |
| L Thalamus          | 0.119    | -0.069   | -73.24   | 46.97  | -165.37  | 18.90    | -0.993 | 1009 |
| R Thalamus          | 0.427    | -0.037   | -30.81   | 38.79  | -106.90  | 45.28    | -0.455 | 1031 |

Results of cortical thickness analysis of PD patients with MoCA scores vs healthy controls. L – Left, R – Right, ROI – region of interest. Banks STS – Banks of the superior temporal sulcus. **Boldface** denotes significant results after Bonferroni correction

### Supplementary Table 7h: Subcortical volume results - HY2 PD vs HY3 PD

| ROI                  | <i>p</i>         | <i>d</i>      | <i>b</i>       | SE           | Lower CI       | Upper CI      | % diff       | NPD        |
|----------------------|------------------|---------------|----------------|--------------|----------------|---------------|--------------|------------|
| <b>L Amygdala</b>    | <b>&lt;0.001</b> | <b>-0.285</b> | <b>-73.61</b>  | <b>15.75</b> | <b>-104.51</b> | <b>-42.71</b> | <b>-5.07</b> | <b>262</b> |
| <b>R Amygdala</b>    | <b>0.001</b>     | <b>-0.190</b> | <b>-55.41</b>  | <b>17.34</b> | <b>-89.42</b>  | <b>-21.40</b> | <b>-3.54</b> | <b>263</b> |
| L Caudate nucleus    | 0.046            | -0.127        | -72.36         | 36.15        | -143.28        | -1.44         | -2.10        | 257        |
| R Caudate nucleus    | 0.024            | -0.140        | -80.07         | 35.52        | -149.76        | -10.38        | -2.28        | 261        |
| L Globus pallidus    | 0.780            | -0.017        | -5.48          | 19.60        | -43.93         | 32.97         | -0.37        | 245        |
| R Globus pallidus    | 0.172            | -0.082        | -23.96         | 17.52        | -58.32         | 10.40         | -1.60        | 255        |
| <b>L Hippocampus</b> | <b>0.001</b>     | <b>-0.213</b> | <b>-115.66</b> | <b>33.83</b> | <b>-182.03</b> | <b>-49.28</b> | <b>-2.96</b> | <b>255</b> |
| <b>R Hippocampus</b> | <b>0.001</b>     | <b>-0.209</b> | <b>-115.61</b> | <b>33.75</b> | <b>-181.83</b> | <b>-49.40</b> | <b>-2.88</b> | <b>261</b> |

|                     |              |               |                |              |                |               |              |            |
|---------------------|--------------|---------------|----------------|--------------|----------------|---------------|--------------|------------|
| L Lateral ventricle | 0.013        | 0.168         | 1306.41        | 524.61       | 277.22         | 2335.60       | 9.02         | 263        |
| R Lateral ventricle | 0.057        | 0.128         | 935.76         | 491.25       | -27.98         | 1899.50       | 6.90         | 263        |
| L Nucleus accumbens | 0.030        | -0.125        | -17.69         | 8.13         | -33.64         | -1.75         | -3.75        | 262        |
| R Nucleus accumbens | 0.038        | -0.123        | -16.56         | 7.96         | -32.18         | -0.94         | -3.40        | 257        |
| <b>L Putamen</b>    | <b>0.001</b> | <b>-0.205</b> | <b>-157.40</b> | <b>47.32</b> | <b>-250.24</b> | <b>-64.56</b> | <b>-3.19</b> | <b>247</b> |
| R Putamen           | 0.034        | -0.125        | -93.97         | 44.31        | -180.89        | -7.05         | -2.00        | 254        |
| L Thalamus          | 0.127        | -0.085        | -86.65         | 56.69        | -197.88        | 24.58         | -1.18        | 255        |
| R Thalamus          | 0.014        | -0.143        | -118.31        | 48.12        | -212.71        | -23.91        | -1.75        | 256        |

Results of cortical thickness analysis of PD patients with MoCA scores vs healthy controls. L – Left, R – Right, ROI – region of interest. Banks STS – Banks of the superior temporal sulcus. **Boldface** denotes significant results after Bonferroni correction

### Supplementary Table 7i: Subcortical volume results - HY3 PD vs HY4&5 PD

| ROI                 | <i>p</i> | <i>d</i> | <i>b</i> | SE      | Lower CI | Upper CI | % diff | NPD |
|---------------------|----------|----------|----------|---------|----------|----------|--------|-----|
| L Amygdala          | 0.468    | -0.088   | -20.24   | 27.85   | -75.03   | 34.56    | -1.489 | 83  |
| R Amygdala          | 0.595    | -0.061   | -16.30   | 30.65   | -76.61   | 44.01    | -1.085 | 83  |
| L Caudate nucleus   | 0.740    | -0.040   | -21.11   | 63.61   | -146.25  | 104.03   | -0.622 | 82  |
| R Caudate nucleus   | 0.593    | 0.067    | 35.17    | 65.82   | -94.33   | 164.67   | 1.025  | 81  |
| L Globus pallidus   | 0.260    | -0.115   | -36.88   | 32.71   | -101.25  | 27.49    | -2.419 | 82  |
| R Globus pallidus   | 0.272    | -0.109   | -34.04   | 30.95   | -94.93   | 26.85    | -2.271 | 81  |
| L Hippocampus       | 0.033    | -0.261   | -123.69  | 57.69   | -237.20  | -10.19   | -3.289 | 81  |
| R Hippocampus       | 0.056    | -0.227   | -119.79  | 62.46   | -242.67  | 3.09     | -3.091 | 82  |
| L Lateral ventricle | 0.193    | 0.163    | 1308.16  | 1003.09 | -665.26  | 3281.57  | 7.730  | 83  |
| R Lateral ventricle | 0.040    | 0.255    | 1888.33  | 914.68  | 88.85    | 3687.81  | 12.150 | 83  |
| L Nucleus accumbens | 0.328    | -0.105   | -14.74   | 15.05   | -44.35   | 14.87    | -3.274 | 82  |
| R Nucleus accumbens | 0.110    | -0.186   | -22.94   | 14.31   | -51.09   | 5.21     | -4.885 | 81  |
| L Putamen           | 0.082    | -0.209   | -136.86  | 78.30   | -290.95  | 17.23    | -2.935 | 79  |
| R Putamen           | 0.013    | -0.286   | -194.66  | 77.75   | -347.63  | -41.68   | -4.335 | 81  |
| L Thalamus          | 0.072    | -0.191   | -168.47  | 93.47   | -352.38  | 15.45    | -2.381 | 81  |
| R Thalamus          | 0.213    | -0.133   | -103.14  | 82.58   | -265.62  | 59.33    | -1.570 | 83  |

Results of cortical thickness analysis of PD patients with MoCA scores vs healthy controls. L – Left, R – Right, ROI – region of interest. Banks STS – Banks of the superior temporal sulcus. **Boldface** denotes significant results after Bonferroni correction

### Supplementary Table 8a: HY stage 1 analysis sample characteristics

| Site         | Cohorts      | N   |    | Mean age, years (SD) |              | % Female |    | DURILL, years (SD) | MoCA (SD)   |             | No med/med |
|--------------|--------------|-----|----|----------------------|--------------|----------|----|--------------------|-------------|-------------|------------|
|              |              | HC  | PD | HC                   | PD           | HC       | PD | PD                 | HC          | PD          | PD         |
| Amsterdam    | Amsterdam 1  | 34  | 0  | 55.3 (8.86)          | NA           | 29       | NA | NA                 | NA          | NA          | NA         |
|              | Amsterdam 2  | 0   | 6  | NA                   | 55.5 (7.56)  | NA       | 50 | 5.5 (1.87)         | NA          | 26.3 (1.97) | 1/5        |
| Bern         | BE 1         | 19  | 1  | 56.3 (8.30)          | 69.0 (0)     | 26       | 0  | 7 (0)              | NA          | NA          | 0/1        |
|              | BE 2         | 17  | 0  | 67.4 (4.46)          | NA           | 53       | NA | NA                 | NA          | NA          | NA         |
| Campinas     | Campinas     | 105 | 23 | 57.3 (6.72)          | 60.8 (9.34)  | 54       | 35 | 4.2 (3.87)         | NA          | NA          | 0/23       |
| Chang Gung   | Chang Gung   | 180 | 78 | 60.7 (7.22)          | 57.3 (11.01) | 47       | 55 | 4.2 (3.03)         | NA          | NA          | NA         |
| Christchurch | Christchurch | 25  | 19 | 64.4 (8.61)          | 61.2 (7.07)  | 16       | 32 | 1.7 (2.54)         | 27.8 (1.37) | 26.5 (2.46) | 14/5       |

|              |                  |            |            |                    |                    |           |           |                   |                    |                    |                |
|--------------|------------------|------------|------------|--------------------|--------------------|-----------|-----------|-------------------|--------------------|--------------------|----------------|
| Donders      | Donders          | 18         | 7          | 61.7 (8.81)        | 58.6 (6.80)        | 39        | 57        | 3.4 (2.23)        | NA                 | NA                 | 1/6            |
| Graz         | GRAZ 1           | 93         | 16         | 60.8 (9.93)        | 55.2 (11.04)       | 25        | 19        | 2 (1.22)          | NA                 | NA                 | 9/7            |
|              | GRAZ 2           | 0          | 4          | NA                 | 57.3 (12.16)       | NA        | 25        | 2.7 (1.49)        | NA                 | NA                 | 2/2            |
| Liege        | Liege 1          | 27         | 4          | 66.0 (4.59)        | 62.8 (6.65)        | 41        | 50        | 2.8 (2.36)        | NA                 | NA                 | 2/2            |
|              | Liege 2          | 34         | 20         | 62.8 (7.09)        | 65.1 (7.22)        | 50        | 50        | 3.6 (1.99)        | NA                 | NA                 | NA             |
| Milan        | Milan            | 7          | 0          | 51.6 (9.62)        | NA                 | 57        | NA        | NA                | NA                 | NA                 | NA             |
| NEUROCON     | NEUROCON         | 8          | 2          | 62.6 (11.88)       | 52.5 (10.61)       | 63        | 0         | NA                | NA                 | NA                 | NA             |
| NW-England   | NW-England 1     | 14         | 4          | 67.6 (6.94)        | 66 (6.53)          | 50        | 75        | 3.1 (1.31)        | 28.1 (1.29)        | 28.8 (1.26)        | 0/4            |
|              | NW-England 2     | 10         | 2          | 64 (4.22)          | 64.5 (14.85)       | 30        | 0         | 4 (0)             | 28.7 (1.49)        | 27.5 (0.71)        | 0/2            |
| ON Japan     | ON Japan         | 9          | 0          | 62.1 (5.06)        | NA                 | 56        | NA        | NA                | NA                 | NA                 | NA             |
| Oxford       | Oxford Discovery | 39         | 27         | 64.4 (7.64)        | 60.4 (8.37)        | 36        | 41        | 1.8 (1.42)        | 28.1 (1.19)        | 27.4 (2.2)         | 5/22           |
| Pennsylvania | UDALL/U19        | 5          | 6          | 67 (5.43)          | 65.5 (6.63)        | 40        | 17        | 3.7 (1.21)        | NA                 | 26.2 (1.94)        | 0/6            |
| PPMI         | PPMI 1           | 3          | 2          | 62 (6.22)          | 58.9 (8.77)        | 33        | 0         | 0.6 (0.42)        | 27.7 (1.15)        | 29 (0)             | 2/0            |
|              | PPMI 2           | 8          | 8          | 60.7 (8.31)        | 61.1 (9.45)        | 25        | 63        | 0.4 (0.26)        | 28.4 (1.3)         | 26.8 (2.76)        | 8/0            |
|              | PPMI 3           | 3          | 4          | 52.7 (10.86)       | 57.3 (10.47)       | 0         | 25        | 1.5 (1.14)        | 28 (1)             | 29 (1.15)          | 4/0            |
|              | PPMI 4           | 3          | 6          | 64 (10.42)         | 62.7 (12.14)       | 0         | 67        | 0.8 (0.51)        | 28 (1)             | 29 (0.89)          | 6/0            |
|              | PPMI 5           | 4          | 9          | 60.8 (7.60)        | 60.4 (13.34)       | 25        | 56        | 0.8 (0.74)        | 28 (0.82)          | 27.9 (1.17)        | 9/0            |
|              | PPMI 6           | 0          | 1          | NA                 | 66.8 (0)           | NA        | 0         | 1.2 (0)           | NA                 | 24 (0)             | 1/0            |
|              | PPMI 7           | 8          | 9          | 61.9 (12.47)       | 58.1 (13.53)       | 25        | 22        | 0.5 (0.25)        | 28.6 (1.41)        | 29.1 (0.93)        | 9/0            |
|              | PPMI 8           | 3          | 10         | 61 (11.97)         | 64.5 (6.99)        | 0         | 40        | 0.5 (0.28)        | 27.7 (1.15)        | 27.5 (1.43)        | 10/0           |
|              | PPMI 9           | 7          | 4          | 58.5 (6.30)        | 58.9 (10.74)       | 43        | 25        | 0.9 (0.56)        | 28.3 (1.25)        | 27.8 (1.89)        | 4/0            |
|              | PPMI 10          | 9          | 16         | 62.7 (6.15)        | 63.6 (8.00)        | 56        | 31        | 0.3 (0.10)        | 27.9 (1.05)        | 26.1 (3.16)        | 16/0           |
|              | PPMI 11          | 6          | 1          | 50.1 (6.54)        | 41.5 (0)           | 67        | 100       | 0.1 (0)           | 29.7 (0.52)        | 30 (0)             | 1/0            |
|              | PPMI 12          | 7          | 5          | 46.9 (6.08)        | 54.8 (12.15)       | 43        | 40        | 0.3 (0.12)        | 29.3 (1.11)        | 28.6 (1.14)        | 5/0            |
|              | PPMI 13          | 0          | 4          | NA                 | 58.5 (14.94)       | NA        | 25        | 0.2 (0.10)        | NA                 | 26 (2.16)          | 4/0            |
|              | PPMI 14          | 13         | 32         | 60.9 (9)           | 57.1 (11.24)       | 38        | 38        | 0.4 (0.35)        | 27.9 (0.86)        | 26.1 (2.83)        | 32/0           |
|              | PPMI 15          | 7          | 9          | 55.5 (5.18)        | 55.2 (3.73)        | 14        | 22        | 0.6 (0.52)        | 27.6 (0.79)        | 28.1 (1.27)        | 9/0            |
|              | PPMI 16          | 7          | 7          | 63.7 (10.16)       | 63 (5.74)          | 14        | 14        | 0.4 (0.28)        | 28.9 (1.21)        | 27.9 (1.35)        | 7/0            |
|              | PPMI 17          | 8          | 7          | 61.8 (11)          | 62.6 (8.58)        | 50        | 43        | 0.7 (0.58)        | 28.4 (0.92)        | 26.1 (3.08)        | 7/0            |
|              | PPMI 18          | 5          | 10         | 66 (4.79)          | 55.7 (9.98)        | 60        | 30        | 0.2 (0.08)        | 28.6 (0.89)        | 28.9 (1.2)         | 10/0           |
|              | PPMI 19          | 8          | 5          | 56.5 (13.8)        | 56.5 (6.12)        | 13        | 40        | 0.6 (1.00)        | 28 (0.93)          | 27.4 (1.67)        | 5/0            |
|              | PPMI 21          | 10         | 11         | 60.7 (4.73)        | 59.9 (10.36)       | 10        | 45        | 1.0 (0.96)        | 28.9 (1.1)         | 26.5 (2.02)        | 11/0           |
|              | Rome SLF         | Rome SLF   | 61         | 50                 | 43.4 (9.52)        | 58 (9.39) | 31        | 32                | 2.8 (1.95)         | NA                 | NA             |
| Stanford     | Stanford         | 8          | 1          | 64.5 (5.09)        | 51.5 (0)           | 75        | 100       | 7.4 (0)           | 28.3 (1.49)        | NA                 | 0/1            |
| Tao Wu       | TaoWu            | 14         | 5          | 65.1 (5.95)        | 65.4 (5.18)        | 36        | 20        | 3 (1.58)          | NA                 | NA                 | NA             |
| <b>Total</b> | <b>41</b>        | <b>846</b> | <b>435</b> | <b>59.5 (9.62)</b> | <b>59.3 (9.82)</b> | <b>39</b> | <b>40</b> | <b>2.3 (2.50)</b> | <b>28.2 (1.21)</b> | <b>27.2 (2.33)</b> | <b>196/131</b> |

HY stage 1 sample demographics. PD – Parkinson’s disease, HC – healthy controls, SD – standard deviation, DURILL – duration of illness, MoCA – Montreal Cognitive Assessment. Med/no med – medicated and non-medicated PD patients

## Supplementary Table 8b: HY stage 2 analysis sample characteristics

| Site         | Cohorts      | N   |     | Mean age, years (SD) |              | % Female |    | DURILL, years (SD) | MoCA (SD) |             | No med/med |
|--------------|--------------|-----|-----|----------------------|--------------|----------|----|--------------------|-----------|-------------|------------|
|              |              | HC  | PD  | HC                   | PD           | HC       | PD |                    | HC        | PD          |            |
| Amsterdam    | Amsterdam 1  | 32  | 0   | 58.9 (8.93)          | NA           | 31       | NA | NA                 | NA        | NA          | NA         |
|              | Amsterdam 2  | 0   | 46  | NA                   | 63.3 (6.59)  | NA       | 39 | 5.7 (3.77)         | NA        | 26.4 (2.26) | 11/35      |
| Bern         | BE 1         | 15  | 13  | 57.8 (7.39)          | 61.2 (11.04) | 20       | 38 | 12.9 (5.04)        | NA        | NA          | 0/13       |
|              | BE 2         | 26  | 0   | 68.3 (4.63)          | NA           | 65       | NA | NA                 | NA        | NA          | NA         |
| Campinas     | Campinas     | 104 | 40  | 60.3 (8.47)          | 59.6 (11.71) | 57       | 35 | 7.3 (6.26)         | NA        | NA          | 0/40       |
| Chang Gung   | Chang Gung   | 180 | 85  | 61.9 (7.37)          | 61.5 (7.77)  | 43       | 36 | 8.6 (5.6)          | NA        | NA          | NA         |
| Christchurch | Christchurch | 38  | 109 | 67.6 (8.62)          | 68.4 (7.43)  | 32       | 27 | 5.2 (5.27)         | 28 (1.41) | 24.6 (3.12) | 30/78      |

|              |                  |            |            |                    |                    |           |           |                   |                    |                    |                |
|--------------|------------------|------------|------------|--------------------|--------------------|-----------|-----------|-------------------|--------------------|--------------------|----------------|
| Donders      | Donders          | 21         | 34         | 64.4 (8.83)        | 58.8 (9.65)        | 43        | 38        | 3.9 (2.70)        | NA                 | NA                 | 2/32           |
| Graz         | GRAZ 1           | 103        | 64         | 66 (8.79)          | 62.9 (9.38)        | 24        | 34        | 4.3 (3.56)        | NA                 | NA                 | 14/50          |
|              | GRAZ 2           | 0          | 14         | NA                 | 64.4 (10.35)       | NA        | 21        | 4.9 (7.12)        | NA                 | NA                 | 1/13           |
| Liege        | Liege 1          | 27         | 15         | 66.8 (4.1)         | 65.1 (7.43)        | 37        | 33        | 8.5 (6.56)        | NA                 | NA                 | 1/14           |
|              | Liege 2          | 38         | 18         | 66 (7.82)          | 66.4 (8.08)        | 42        | 33        | 7.8 (4.5)         | NA                 | NA                 | NA             |
| Milan        | Milan            | 4          | 19         | 62.5 (8.81)        | 57.7 (8.12)        | 50        | 37        | 12.2 (3.1)        | NA                 | NA                 | NA             |
| NEUROCON     | NEUROCON         | 13         | 22         | 69.2 (10.44)       | 68.9 (9.62)        | 77        | 36        | NA                | NA                 | NA                 | NA             |
| NW-England   | NW-England 1     | 20         | 9          | 70.1 (7.38)        | 66.9 (8.27)        | 45        | 22        | 5.9 (4.28)        | 28.3 (1.33)        | 26.3 (4.77)        | 0/9            |
|              | NW-England 2     | 11         | 4          | 64.3 (3.95)        | 64.3 (4.99)        | 36        | 0         | 5.8 (3.86)        | 28.8 (1.47)        | 27.5 (3.54)        | 0/4            |
| ON Japan     | ON Japan         | 14         | 0          | 63.4 (5.43)        | NA                 | 50        | NA        | NA                | NA                 | NA                 | NA             |
| Oxford       | Oxford Discovery | 52         | 70         | 66.9 (6.77)        | 63.6 (10.19)       | 33        | 39        | 2.4 (1.57)        | 28.1 (1.29)        | 26.4 (2.81)        | 8/62           |
| Pennsylvania | UDALL/U19        | 10         | 36         | 69.5 (5.82)        | 65.4 (7.93)        | 60        | 31        | 6.3 (4.17)        | NA                 | 26.2 (3.15)        | 0/6            |
| PPMI         | PPMI 1           | 5          | 12         | 68.9 (11.23)       | 62.7 (8.02)        | 40        | 50        | 0.6 (0.56)        | 27.6 (0.89)        | 26.7 (1.92)        | 12/0           |
|              | PPMI 2           | 11         | 7          | 63.7 (9.29)        | 64 (7.22)          | 27        | 71        | 1.1 (0.98)        | 28 (1.26)          | 25.9 (0.9)         | 7/0            |
|              | PPMI 3           | 2          | 13         | 64.5 (0.78)        | 61.2 (10.71)       | 50        | 31        | 0.6 (0.63)        | 27 (0)             | 27.2 (1.92)        | 13/0           |
|              | PPMI 4           | 5          | 4          | 69.5 (10.65)       | 72 (5.37)          | 0         | 50        | 1.1 (1.11)        | 27.6 (0.89)        | 27.5 (1)           | 4/0            |
|              | PPMI 5           | 7          | 4          | 66.2 (4.57)        | 67.2 (2.38)        | 43        | 0         | 0.8 (0.57)        | 27.7 (0.76)        | 26.8 (0.96)        | 4/0            |
|              | PPMI 6           | 1          | 1          | 80.9 (0)           | 55.8 (0)           | 0         | 0         | 1.4 (0)           | 26 (0)             | 26 (0)             | 1/0            |
|              | PPMI 7           | 7          | 1          | 66.2 (12.26)       | 57.9 (0)           | 14        | 0         | 1.3 (0)           | 28.4 (1.4)         | 30 (0)             | 1/0            |
|              | PPMI 8           | 4          | 2          | 62 (9.96)          | 70.1 (1.06)        | 0         | 50        | 0.5 (0.21)        | 27.5 (1)           | 29.5 (0.71)        | 2/0            |
|              | PPMI 9           | 6          | 12         | 62.2 (7.08)        | 64.5 (5.64)        | 17        | 42        | 0.6 (0.32)        | 28.2 (1.17)        | 28.5 (1.83)        | 12/0           |
|              | PPMI 10          | 7          | 5          | 67.6 (4.84)        | 64.7 (15.51)       | 43        | 40        | 0.4 (0.46)        | 28.1 (1.07)        | 27.2 (2.17)        | 5/0            |
|              | PPMI 11          | 4          | 4          | 58.4 (13.45)       | 63.6 (7.36)        | 25        | 75        | 0.2 (0)           | 29.5 (0.58)        | 26.8 (0.96)        | 4/0            |
|              | PPMI 12          | 8          | 14         | 54.4 (16.26)       | 59.6 (9.98)        | 13        | 29        | 0.6 (0.55)        | 29.1 (1.13)        | 28.7 (1.2)         | 14/0           |
|              | PPMI 13          | 0          | 2          | NA                 | 62 (9.55)          | NA        | 0         | 0.3 (0.07)        | NA                 | 29 (1.41)          | 2/0            |
|              | PPMI 14          | 12         | 28         | 62.7 (8.25)        | 64.3 (7.3)         | 25        | 21        | 0.4 (0.36)        | 28.3 (0.87)        | 25.8 (2.01)        | 28/0           |
|              | PPMI 15          | 11         | 4          | 60.5 (8.74)        | 60 (10.73)         | 36        | 25        | 0.3 (0.24)        | 27.8 (0.87)        | 27.8 (2.06)        | 4/0            |
|              | PPMI 16          | 9          | 6          | 65 (9.38)          | 60.5 (10.63)       | 11        | 50        | 1.2 (0.88)        | 28.6 (1.24)        | 28.2 (1.72)        | 6/0            |
|              | PPMI 17          | 7          | 11         | 60.8 (11.48)       | 67.9 (9.11)        | 43        | 45        | 0.7 (0.39)        | 28.4 (0.98)        | 27.2 (1.6)         | 11/0           |
|              | PPMI 18          | 5          | 10         | 66 (4.79)          | 59.3 (8.47)        | 60        | 20        | 0.6 (0.71)        | 28.6 (0.89)        | 28.8 (1.32)        | 10/0           |
|              | PPMI 19          | 8          | 13         | 58.8 (12.04)       | 59.6 (10.3)        | 25        | 23        | 0.7 (0.57)        | 28 (0.93)          | 27.4 (1.61)        | 13/0           |
|              | PPMI 20          | 0          | 2          | NA                 | 67.6 (5.02)        | NA        | 0         | 0.3 (0)           | NA                 | 24 (1.41)          | 2/0            |
|              | PPMI 21          | 10         | 7          | 60.7 (4.73)        | 63.8 (8.91)        | 10        | 43        | 0.6 (0.61)        | 28.9 (1.1)         | 25.9 (2.67)        | 7/0            |
| Rome SLF     | Rome SLF         | 42         | 138        | 42.7 (10.36)       | 63.3 (10.11)       | 10        | 41        | 5.4 (4.7)         | NA                 | NA                 | 0/137          |
| Stanford     | Stanford         | 10         | 30         | 65.6 (6.82)        | 66.7 (7.36)        | 80        | 50        | 5.4 (3.14)        | 27.9 (1.66)        | 25.1 (4.72)        | 0/30           |
| Tao Wu       | TaoWu            | 18         | 12         | 65.2 (5.7)         | 65 (4.65)          | 33        | 58        | 5.4 (3.78)        | NA                 | NA                 | NA             |
| <b>Total</b> | <b>42</b>        | <b>907</b> | <b>940</b> | <b>62.9 (9.66)</b> | <b>63.7 (9.21)</b> | <b>38</b> | <b>36</b> | <b>4.9 (4.97)</b> | <b>28.2 (1.25)</b> | <b>26.2 (2.99)</b> | <b>229/493</b> |

HY stage 2 sample demographics. PD – Parkinson’s disease, HC – healthy controls, SD – standard deviation, DURILL – duration of illness, MoCA – Montreal Cognitive Assessment. Med/no med – medicated and non-medicated PD patients

### Supplementary Table 8c: HY stage 3 analysis sample characteristics

| Site       | Cohorts     | N   |    | Mean age, years (SD) |              | % Female |     | DURILL, years (SD) | MoCA (SD) |           | No med/med PD |
|------------|-------------|-----|----|----------------------|--------------|----------|-----|--------------------|-----------|-----------|---------------|
|            |             | HC  | PD | HC                   | PD           | HC       | PD  |                    | HC        | PD        |               |
| Amsterdam  | Amsterdam 1 | 21  | 0  | 57.9 (8.71)          | NA           | 24       | NA  | NA                 | NA        | NA        | NA            |
|            | Amsterdam 2 | 0   | 5  | NA                   | 60.2 (9.09)  | NA       | 60  | 3.4 (3.21)         | NA        | 26 (1.73) | 2/3           |
| Bern       | BE 1        | 11  | 10 | 56.1 (10.22)         | 66 (11.01)   | 36       | 70  | 12.9 (3.63)        | NA        | NA        | 0/10          |
|            | BE 2        | 17  | 2  | 69.1 (5.29)          | 57.5 (7.78)  | 59       | 100 | 7.0 (1.41)         | NA        | NA        | 0/2           |
| Campinas   | Campinas    | 58  | 20 | 61.6 (9.37)          | 58.6 (11.28) | 53       | 40  | 10.3 (6.82)        | NA        | NA        | 0/20          |
| Chang Gung | Chang Gung  | 115 | 54 | 63.0 (8.13)          | 59.4 (9.84)  | 48       | 41  | 13.2 (7.07)        | NA        | NA        | NA            |

|              |                  |            |            |                    |                     |              |           |                 |                   |                    |              |     |
|--------------|------------------|------------|------------|--------------------|---------------------|--------------|-----------|-----------------|-------------------|--------------------|--------------|-----|
| Christchurch | Christchurch     | 17         | 43         | 71.9 (7.39)        | 72.4 (7.67)         | 24           | 30        | 6.7 (5.38)      | 27.6 (1.32)       | 22.2 (4.28)        | 4/39         |     |
| Donders      | Donders          | 15         | 14         | 65.6 (10.1)        | 66.5 (12.06)        | 40           | 64        | 6.4 (5.97)      | NA                | NA                 | 0/14         |     |
| Graz         | GRAZ 1           | 52         | 5          | 68.3 (9.36)        | 71.5 (3.35)         | 25           | 40        | 10.1 (6.66)     | NA                | NA                 | 0/5          |     |
| Liege        | Liege 1          | 20         | 4          | 66.6 (4.21)        | 70.0 (2.94)         | 45           | 75        | 9.8 (0.96)      | NA                | NA                 | 0/4          |     |
|              | Liege 2          | 20         | 3          | 69.0 (8.4)         | 80.0 (7.55)         | 30           | 67        | 7.3 (2.89)      | NA                | NA                 | NA           |     |
| Milan        | Milan            | 3          | 4          | 65.0 (8.89)        | 55.8 (8.26)         | 33           | 50        | 10.5 (3)        | NA                | NA                 | 0/4          |     |
| NEUROCON     | NEUROCON         | 12         | 0          | 70.3 (9.96)        | NA                  | 75           | NA        | NA              | NA                | NA                 | NA           |     |
| NW-England   | NW-England 1     | 11         | 11         | 73.4 (5.82)        | 70.7 (10.12)        | 36           | 9         | 7.2 (3.54)      | 28.5 (1.21)       | 24.3 (4.08)        | 0/11         |     |
|              | NW-England 2     | 6          | 1          | 63.7 (4.5)         | 72 (0)              | 33           | 100       | 10 (0)          | 28.7 (1.63)       | 24 (0)             | 0/1          |     |
| ON Japan     | ON Japan         | 8          | 0          | 64.9 (6.38)        | NA                  | 38           | NA        | NA              | NA                | NA                 | NA           |     |
| Oxford       | Oxford Discovery | 21         | 2          | 72.4 (4.77)        | 71.1 (7.57)         | 29           | 50        | 2.1 (2.3)       | 28.2 (1.42)       | 27.5 (0.71)        | 0/2          |     |
| Pennsylvania | UDALL/U19        | 7          | 60         | 71.9 (5.3)         | 66.4 (8.12)         | 57           | 37        | 8.1 (5.86)      | NA                | 25.7 (2.7)         | 0/60         |     |
| PPMI         | PPMI 1           | 2          | 0          | 80.6 (1.84)        | NA                  | 100          | NA        | NA              | 27.5 (0.71)       | NA                 | NA           |     |
|              | PPMI 2           | 3          | 0          | 73.5 (5.47)        | NA                  | 0            | NA        | NA              | 28 (1.73)         | NA                 | NA           |     |
|              | PPMI 4           | 3          | 0          | 77.3 (1.7)         | NA                  | 0            | NA        | NA              | 27.7 (1.15)       | NA                 | NA           |     |
|              | PPMI 5           | 3          | 0          | 68.2 (3.14)        | NA                  | 100          | NA        | NA              | 28 (1)            | NA                 | NA           |     |
|              | PPMI 6           | 1          | 0          | 80.9 (0)           | NA                  | 0            | NA        | NA              | 26 (0)            | NA                 | NA           |     |
|              | PPMI 7           | 4          | 0          | 68.9 (18.13)       | NA                  | 75           | NA        | NA              | 29.5 (0.58)       | NA                 | NA           |     |
|              | PPMI 8           | 2          | 0          | 65.4 (13.22)       | NA                  | 0            | NA        | NA              | 27 (0)            | NA                 | NA           |     |
|              | PPMI 9           | 2          | 0          | 63.3 (10.32)       | NA                  | 0            | NA        | NA              | 29.5 (0.71)       | NA                 | NA           |     |
|              | PPMI 10          | 3          | 0          | 70 (3.23)          | NA                  | 33           | NA        | NA              | 28.3 (1.53)       | NA                 | NA           |     |
|              | PPMI 11          | 4          | 0          | 58 (13.77)         | NA                  | 25           | NA        | NA              | 29.5 (0.58)       | NA                 | NA           |     |
|              | PPMI 12          | 2          | 0          | 72.4 (9.12)        | NA                  | 0            | NA        | NA              | 29.5 (0.71)       | NA                 | NA           |     |
|              | PPMI 14          | 3          | 0          | 57.7 (16.76)       | NA                  | 33           | NA        | NA              | 28.3 (1.15)       | NA                 | NA           |     |
|              | PPMI 15          | 2          | 0          | 74.6 (3.25)        | NA                  | 50           | NA        | NA              | 28 (1.41)         | NA                 | NA           |     |
|              | PPMI 16          | 3          | 0          | 73.3 (0.38)        | NA                  | 33           | NA        | NA              | 29 (1)            | NA                 | NA           |     |
|              | PPMI 17          | 4          | 0          | 67.5 (9.46)        | NA                  | 25           | NA        | NA              | 28.3 (0.96)       | NA                 | NA           |     |
|              | PPMI 18          | 2          | 0          | 71.1 (1.27)        | NA                  | 50           | NA        | NA              | 28 (0)            | NA                 | NA           |     |
|              | PPMI 19          | 4          | 0          | 56.3 (16.4)        | NA                  | 0            | NA        | NA              | 28.5 (0.58)       | NA                 | NA           |     |
|              | PPMI 21          | 2          | 2          | 64.3 (2.76)        | 61.5 (8.77)         | 0            | 50        | 0.3 (0.14)      | 28.5 (0.71)       | 26 (1.41)          | 2/0          |     |
|              | Rome SLF         | Rome SLF   | 24         | 9                  | 48.4 (8.32)         | 67.1 (10.87) | 29        | 33              | 9.4 (3.09)        | NA                 | NA           | 0/9 |
|              | Stanford         | Stanford   | 5          | 8                  | 68.4 (8.89)         | 73.3 (8.68)  | 100       | 75              | 7.4 (4.61)        | 28.2 (2.05)        | 20.3 (4.4)   | NA  |
|              | Tao Wu           | TaoWu      | 9          | 1                  | 68.1 (5.62)         | 62 (0)       | 22        | 100             | 6 (0)             | NA                 | NA           | NA  |
| <b>Total</b> | <b>39</b>        | <b>501</b> | <b>258</b> | <b>64.9 (9.98)</b> | <b>65.7 (10.41)</b> | <b>40</b>    | <b>42</b> | <b>9 (6.24)</b> | <b>28.3 (1.3)</b> | <b>24.1 (3.91)</b> | <b>8/184</b> |     |

HY stage 3 sample demographics. PD – Parkinson’s disease, HC – healthy controls, SD – standard deviation, DURILL – duration of illness, MoCA – Montreal Cognitive Assessment. Med/no med – medicated and non-medicated PD patients

## Supplementary Table 8d: HY stage 4&5 analysis sample characteristics

| Site         | Cohorts        | N  |    | Mean age, years (SD) |              | % Female |    | DURILL, years (SD) | MoCA (SD)   |             | No med/med |
|--------------|----------------|----|----|----------------------|--------------|----------|----|--------------------|-------------|-------------|------------|
|              |                | HC | PD | HC                   | PD           | HC       | PD |                    | HC          | PD          |            |
| Amsterdam    | Amsterdam 1    | 17 | 0  | 60.7 (9.26)          | NA           | 47       | NA | NA                 | NA          | NA          | NA         |
| Bern         | BE 1           | 3  | 4  | 53.3 (8.08)          | 65.3 (5.91)  | 67       | 75 | 13.8 (1.26)        | NA          | NA          | 0/4        |
|              | BE 2           | 13 | 1  | 69.6 (4.33)          | 64 (0)       | 69       | 0  | 20 (0)             | NA          | NA          | 0/1        |
| Campinas     | UNICAMP        | 31 | 13 | 65.1 (9.59)          | 62.2 (8.22)  | 68       | 31 | 13 (5.4)           | NA          | NA          | 0/13       |
| Chang Gung   | Chang Gung     | 79 | 34 | 63.4 (7.71)          | 63.5 (9.88)  | 57       | 62 | 14.9 (5.19)        | NA          | NA          | NA         |
| Christchurch | Christchurch   | 13 | 17 | 74.7 (3.7)           | 74.3 (5.74)  | 31       | 24 | 11.7 (6.96)        | 27.7 (1.55) | 17.7 (5.38) | 0/17       |
| Donders      | Donders        | 10 | 0  | 65.7 (11.31)         | NA           | 50       | NA | NA                 | NA          | NA          | NA         |
| Graz         | PROMOVE/ASPS I | 32 | 2  | 71.8 (7.95)          | 64.3 (10.82) | 19       | 0  | 13.9 (11.73)       | NA          | NA          | 2/0        |
| Liege        | Liege 1        | 11 | 0  | 68.0 (4)             | NA           | 27       | NA | NA                 | NA          | NA          | NA         |

|              |                  |            |           |                    |                    |           |           |                   |                    |                    |             |
|--------------|------------------|------------|-----------|--------------------|--------------------|-----------|-----------|-------------------|--------------------|--------------------|-------------|
|              | Liege 2          | 13         | 0         | 71.9 (6.84)        | NA                 | 38        | NA        | NA                | NA                 | NA                 | NA          |
| Milan        | Milan            | 5          | 0         | 57.2 (12.83)       | NA                 | 80        | NA        | NA                | NA                 | NA                 | NA          |
| NEUROCON     | NEUROCON         | 6          | 0         | 74.7 (6.5)         | NA                 | 67        | NA        | NA                | NA                 | NA                 | NA          |
| NW-England   | NW-England 1     | 12         | 5         | 72.0 (4.41)        | 72.4 (7.5)         | 33        | 0         | 11.2 (4.82)       | 28.7 (1.23)        | 22.6 (3.13)        | 0/5         |
|              | NW-England 2     | 6          | 1         | 64.8 (5.42)        | 61 (0)             | 17        | 100       | 18 (0)            | 28.2 (1.6)         | 24 (0)             | 0/1         |
| ON Japan     | ON Japan         | 8          | 0         | 64.1 (4.55)        | NA                 | 63        | NA        | NA                | NA                 | NA                 | NA          |
| Oxford       | Oxford Discovery | 10         | 2         | 73.8 (5.03)        | 68.7 (4.55)        | 50        | 50        | 5.9 (0.32)        | 28 (1.49)          | 23.5 (2.12)        | 0/2         |
| Pennsylvania | UDALL/U19        | 3          | 2         | 72.7 (5.51)        | 75 (8.49)          | 67        | 0         | 15.5 (2.12)       | NA                 | 14.5 (0.71)        | 0/2         |
| PPMI         | PPMI 1           | 2          | 0         | 80.6 (1.84)        | NA                 | 100       | NA        | NA                | 27.5 (0.71)        | NA                 | NA          |
|              | PPMI 2           | 4          | 0         | 71.5 (5.79)        | NA                 | 25        | NA        | NA                | 29 (1.41)          | NA                 | NA          |
|              | PPMI 4           | 1          | 0         | 79.2 (0)           | NA                 | 0         | NA        | NA                | 27 (0)             | NA                 | NA          |
|              | PPMI 5           | 3          | 0         | 70.0 (0.4)         | NA                 | 67        | NA        | NA                | 27.7 (1.15)        | NA                 | NA          |
|              | PPMI 6           | 1          | 0         | 80.9 (0)           | NA                 | 0         | NA        | NA                | 26 (0)             | NA                 | NA          |
|              | PPMI 7           | 2          | 0         | 76.9 (5.09)        | NA                 | 50        | NA        | NA                | 28 (1.41)          | NA                 | NA          |
|              | PPMI 8           | 1          | 0         | 56 (0)             | NA                 | 0         | NA        | NA                | 27 (0)             | NA                 | NA          |
|              | PPMI 9           | 2          | 0         | 60.7 (6.65)        | NA                 | 0         | NA        | NA                | 29 (1.41)          | NA                 | NA          |
|              | PPMI 10          | 3          | 0         | 70.7 (4.62)        | NA                 | 33        | NA        | NA                | 27.7 (1.15)        | NA                 | NA          |
|              | PPMI 11          | 1          | 0         | 76.8 (0)           | NA                 | 0         | NA        | NA                | 29 (0)             | NA                 | NA          |
|              | PPMI 12          | 4          | 0         | 66.3 (12.73)       | NA                 | 0         | NA        | NA                | 29.3 (0.96)        | NA                 | NA          |
|              | PPMI 14          | 1          | 0         | 68.1 (0)           | NA                 | 100       | NA        | NA                | 28 (0)             | NA                 | NA          |
|              | PPMI 15          | 2          | 0         | 74.6 (3.25)        | NA                 | 50        | NA        | NA                | 28 (1.41)          | NA                 | NA          |
|              | PPMI 16          | 4          | 0         | 72.5 (1.74)        | NA                 | 25        | NA        | NA                | 28.8 (0.96)        | NA                 | NA          |
|              | PPMI 17          | 1          | 0         | 71.5 (0)           | NA                 | 0         | NA        | NA                | 28 (0)             | NA                 | NA          |
|              | PPMI 18          | 1          | 0         | 72 (0)             | NA                 | 0         | NA        | NA                | 28 (0)             | NA                 | NA          |
|              | PPMI 19          | 2          | 0         | 73.9 (2.19)        | NA                 | 0         | NA        | NA                | 28.5 (0.71)        | NA                 | NA          |
|              | PPMI 21          | 1          | 0         | 61 (0)             | NA                 | 0         | NA        | NA                | 27 (0)             | NA                 | NA          |
| Rome SLF     | Rome SLF         | 8          | 0         | 46.1 (9.06)        | NA                 | 38        | NA        | NA                | NA                 | NA                 | NA          |
| Stanford     | Stanford         | 3          | 2         | 74.4 (4.37)        | 73.9 (6.79)        | 100       | 0         | 4.3 (0.49)        | 28.3 (2.08)        | 15.5 (2.12)        | 0/2         |
| Tao Wu       | TaoWu            | 10         | 0         | 65.1 (5.04)        | NA                 | 40        | NA        | NA                | NA                 | NA                 | NA          |
| <b>Total</b> | <b>38</b>        | <b>329</b> | <b>83</b> | <b>66.8 (9.22)</b> | <b>66.8 (9.38)</b> | <b>47</b> | <b>41</b> | <b>13.3 (5.8)</b> | <b>28.2 (1.33)</b> | <b>18.8 (5.12)</b> | <b>2/45</b> |

HY stages 4/5 sample demographics. PD – Parkinson’s disease, HC – healthy controls, SD – standard deviation, DURILL – duration of illness, MoCA – Montreal Cognitive Assessment. Med/no med – medicated and non-medicated PD patients

### Supplementary Table 9: Overlap controls in HY stage analyses

| HY stage | 1   | 2   | 3   |
|----------|-----|-----|-----|
| 2        | 672 | .   | .   |
| 3        | 359 | 437 | .   |
| 4-5      | 211 | 294 | 209 |

Amount of control subjects that overlapped across HY stage analyses.

### Supplementary Table 10a: Group differences on DURILL across HY stages

| HY stage | N | Mean (SD) | Median | IQR | Z    |      |      | p    |      |      |
|----------|---|-----------|--------|-----|------|------|------|------|------|------|
|          |   |           |        |     | HY 1 | HY 2 | HY 3 | HY 1 | HY 2 | HY 3 |

|     |      |             |     |     |       |       |      |         |         |         |
|-----|------|-------------|-----|-----|-------|-------|------|---------|---------|---------|
| 1   | 436  | 2.27 (2.50) | 1.2 | 2.6 | NA    | NA    | NA   | NA      | NA      | NA      |
| 2   | 1039 | 4.88 (4.90) | 3.2 | 6   | -10.4 | NA    | NA   | < 0.001 | NA      | NA      |
| 3   | 264  | 9.01 (6.29) | 8   | 8   | -16.5 | -11   | NA   | < 0.001 | < 0.001 | NA      |
| 4-5 | 83   | 13.6 (5.80) | 14  | 7.1 | -13.5 | -11.4 | -5.8 | < 0.001 | < 0.001 | < 0.001 |

Mann-Whitney tests for group differences across HY stages. Abbreviations: DURILL, duration of illness.

### Supplementary Table 10b: Group differences on MoCA across HY stages

| HY stage | N   | Mean (SD)   | Median | IQR | Z    |      |      | p       |         |         |
|----------|-----|-------------|--------|-----|------|------|------|---------|---------|---------|
|          |     |             |        |     | HY 1 | HY 2 | HY 3 | HY 1    | HY 2    | HY 3    |
| 1        | 228 | 27.2 (2.32) | 28     | 3   | NA   | NA   | NA   | NA      | NA      | NA      |
| 2        | 525 | 26.0 (3.04) | 27     | 4   | -4.5 | NA   | NA   | < 0.001 | NA      | NA      |
| 3        | 135 | 24.2 (3.93) | 25     | 5   | -7.4 | -4.6 | NA   | < 0.001 | < 0.001 | NA      |
| 4-5      | 31  | 19.2 (5.23) | 19     | 9.5 | -7.7 | -6.8 | -4.5 | < 0.001 | < 0.001 | < 0.001 |

Mann-Whitney tests for group differences across HY stages. Abbreviations: MoCA, Montreal Cognitive Assessment.

### Supplementary Table 11a: Cortical thickness results - Group differences corrected for DURILL across HY stages

|                             | HY1 vs HY2 |        | HY1 vs HY3 |        | HY1 vs HY4-5 |        | HY2 vs HY3 |        | HY2 vs HY4 |        | HY3 vs HY4 |        |
|-----------------------------|------------|--------|------------|--------|--------------|--------|------------|--------|------------|--------|------------|--------|
|                             | p          | d      | p          | d      | p            | d      | p          | d      | p          | d      | p          | d      |
| L Banks STS                 | 0.451      | 0.037  | 0.020      | -0.169 | 0.142        | -0.167 | 0.011      | -0.149 | 0.012      | -0.244 | 0.028      | -0.230 |
| R Banks STS                 | 0.987      | 0.001  | 0.042      | -0.136 | 0.206        | -0.134 | 0.019      | -0.136 | 0.140      | -0.144 | 0.561      | -0.058 |
| L Caudal anterior cingulate | 0.945      | 0.003  | 0.837      | 0.014  | 0.261        | 0.119  | 0.323      | -0.063 | 0.690      | 0.042  | 0.668      | 0.048  |
| R Caudal anterior cingulate | 0.623      | -0.025 | 0.774      | 0.020  | 0.257        | -0.120 | 0.543      | -0.038 | 0.037      | -0.216 | 0.085      | -0.195 |
| L Caudal middle frontal     | 0.443      | 0.038  | 0.081      | -0.120 | 0.053        | -0.214 | 0.089      | -0.102 | 0.068      | -0.184 | 0.160      | -0.143 |
| R Caudal middle frontal     | 0.719      | -0.018 | 0.008      | -0.183 | 0.142        | -0.160 | 0.063      | -0.116 | 0.726      | -0.037 | 0.927      | 0.009  |
| L Cuneus                    | 0.523      | -0.032 | 0.201      | -0.087 | 0.982        | 0.002  | 0.069      | -0.114 | 0.713      | 0.038  | 0.418      | 0.089  |
| R Cuneus                    | 0.529      | -0.029 | 0.046      | -0.118 | 0.451        | -0.071 | 0.047      | -0.112 | 0.995      | 0.001  | 0.697      | 0.034  |
| L Entorhinal                | 0.638      | -0.024 | 0.009      | -0.184 | 0.102        | -0.175 | 0.009      | -0.162 | 0.027      | -0.228 | 0.958      | 0.006  |
| R Entorhinal                | 0.881      | -0.006 | 0.062      | -0.113 | 0.089        | -0.151 | 0.050      | -0.104 | 0.124      | -0.131 | 0.809      | -0.021 |
| L Frontal pole              | 0.673      | -0.022 | 0.450      | -0.056 | 0.121        | -0.175 | 0.451      | -0.049 | 0.284      | -0.115 | 0.296      | -0.128 |
| R Frontal pole              | 0.200      | -0.065 | 0.172      | -0.097 | 0.065        | -0.200 | 0.358      | -0.057 | 0.005      | -0.288 | 0.002      | -0.329 |
| L Fusiform                  | 0.742      | -0.016 | 0.002      | -0.197 | 0.013        | -0.249 | 0.003      | -0.175 | 0.001      | -0.326 | 0.094      | -0.160 |
| R Fusiform                  | 0.614      | -0.020 | 0.006      | -0.152 | 0.067        | -0.160 | 0.013      | -0.121 | 0.008      | -0.216 | 0.033      | -0.167 |
| L Inferior parietal         | 0.851      | -0.009 | 0.001      | -0.228 | 0.261        | -0.122 | <0.001     | -0.215 | 0.127      | -0.153 | 0.450      | -0.075 |



|                              |       |        |                  |               |       |        |                  |               |                  |               |              |               |
|------------------------------|-------|--------|------------------|---------------|-------|--------|------------------|---------------|------------------|---------------|--------------|---------------|
| R Inferior parietal          | 0.704 | 0.017  | 0.084            | -0.110        | 0.141 | -0.149 | 0.015            | -0.138        | 0.027            | -0.212        | 0.194        | -0.124        |
| L Inferior temporal          | 0.789 | 0.013  | 0.049            | -0.134        | 0.481 | -0.073 | 0.004            | -0.178        | 0.005            | -0.280        | 0.244        | -0.124        |
| R Inferior temporal          | 0.863 | -0.008 | 0.034            | -0.129        | 0.158 | -0.134 | 0.215            | -0.070        | 0.032            | -0.203        | 0.041        | -0.183        |
| L Insula                     | 0.650 | -0.024 | 0.153            | -0.105        | 0.205 | -0.142 | 0.898            | -0.008        | 0.405            | -0.090        | 0.103        | -0.193        |
| R Insula                     | 0.349 | -0.044 | 0.345            | -0.061        | 0.221 | -0.118 | 0.903            | 0.007         | 0.060            | -0.174        | 0.012        | -0.232        |
| L Isthmus cingulate          | 0.462 | -0.038 | 0.041            | -0.145        | 0.126 | -0.169 | 0.022            | -0.144        | 0.021            | -0.241        | 0.124        | -0.172        |
| R Isthmus cingulate          | 0.778 | -0.014 | 0.438            | -0.052        | 0.751 | -0.034 | 0.033            | -0.130        | 0.065            | -0.188        | 0.538        | -0.066        |
| L Lateral occipital          | 0.472 | -0.036 | 0.124            | -0.105        | 0.329 | -0.106 | 0.027            | -0.134        | 0.847            | -0.020        | 0.252        | 0.116         |
| R Lateral occipital          | 0.481 | -0.035 | 0.283            | -0.073        | 0.559 | -0.063 | 0.028            | -0.132        | 0.211            | -0.126        | 0.616        | -0.054        |
| L Lateral orbitofrontal      | 0.850 | 0.009  | 0.073            | -0.117        | 0.227 | -0.123 | 0.015            | -0.141        | 0.028            | -0.210        | 0.153        | -0.147        |
| R Lateral orbitofrontal      | 0.260 | -0.048 | 0.094            | -0.098        | 0.007 | -0.246 | 0.296            | -0.055        | 0.003            | -0.257        | 0.001        | -0.266        |
| L Lingual                    | 0.244 | -0.056 | 0.003            | -0.204        | 0.092 | -0.175 | 0.002            | -0.185        | 0.060            | -0.183        | 0.563        | -0.057        |
| R Lingual                    | 0.159 | -0.060 | 0.012            | -0.145        | 0.174 | -0.122 | 0.049            | -0.104        | 0.636            | -0.042        | 0.649        | -0.040        |
| L Medial orbitofrontal       | 0.965 | 0.002  | 0.985            | 0.001         | 0.102 | -0.173 | 0.958            | -0.003        | 0.086            | -0.180        | 0.023        | -0.268        |
| R Medial orbitofrontal       | 0.664 | -0.020 | 0.929            | -0.005        | 0.043 | -0.195 | 0.984            | -0.001        | 0.005            | -0.258        | <b>0.001</b> | <b>-0.305</b> |
| L Middle temporal            | 0.494 | -0.034 | <b>&lt;0.001</b> | <b>-0.254</b> | 0.051 | -0.203 | <b>&lt;0.001</b> | <b>-0.222</b> | 0.001            | -0.330        | 0.097        | -0.176        |
| R Middle temporal            | 0.758 | -0.014 | 0.007            | -0.168        | 0.041 | -0.197 | 0.008            | -0.150        | <b>&lt;0.001</b> | <b>-0.334</b> | 0.009        | -0.238        |
| L Paracentral                | 0.808 | -0.012 | 0.025            | -0.145        | 0.659 | -0.045 | 0.045            | -0.118        | 0.888            | -0.014        | 0.828        | 0.021         |
| R Paracentral                | 0.732 | -0.016 | 0.017            | -0.150        | 0.867 | -0.017 | 0.097            | -0.098        | 0.994            | -0.001        | 0.981        | 0.002         |
| L Parahippocampal            | 0.175 | -0.069 | 0.018            | -0.168        | 0.180 | -0.145 | 0.172            | -0.085        | 0.189            | -0.136        | 0.735        | -0.038        |
| R Parahippocampal            | 0.494 | -0.033 | 0.003            | -0.198        | 0.031 | -0.226 | 0.001            | -0.195        | 0.009            | -0.261        | 0.635        | -0.050        |
| L Pars opercularis           | 0.856 | 0.009  | 0.033            | -0.139        | 0.122 | -0.163 | 0.088            | -0.100        | 0.038            | -0.205        | 0.032        | -0.219        |
| R Pars opercularis           | 0.694 | 0.018  | 0.437            | -0.050        | 0.766 | -0.031 | 0.408            | -0.048        | 0.668            | -0.042        | 0.271        | -0.106        |
| L Pars orbitalis             | 0.546 | -0.030 | 0.048            | -0.139        | 0.023 | -0.251 | 0.211            | -0.076        | 0.024            | -0.232        | 0.037        | -0.230        |
| R Pars orbitalis             | 0.138 | -0.073 | 0.937            | -0.005        | 0.431 | -0.083 | 0.704            | 0.023         | 0.128            | -0.154        | 0.008        | -0.290        |
| L Pars triangularis          | 0.351 | 0.044  | 0.032            | -0.141        | 0.401 | -0.089 | 0.017            | -0.142        | 0.373            | -0.089        | 0.974        | -0.003        |
| R Pars triangularis          | 0.883 | 0.007  | 0.149            | -0.093        | 0.423 | -0.083 | 0.512            | -0.039        | 0.569            | -0.057        | 0.276        | -0.110        |
| L Pericalcarine              | 0.017 | -0.109 | 0.477            | -0.048        | 0.996 | -0.001 | 0.373            | -0.052        | 0.628            | -0.045        | 0.736        | -0.038        |
| R Pericalcarine              | 0.216 | -0.052 | 0.004            | -0.166        | 0.141 | -0.130 | 0.089            | -0.092        | 0.535            | 0.055         | 0.778        | 0.025         |
| L Postcentral                | 0.903 | 0.006  | 0.200            | -0.081        | 0.060 | -0.191 | 0.155            | -0.080        | 0.031            | -0.205        | 0.045        | -0.196        |
| R Postcentral                | 0.868 | -0.007 | 0.178            | -0.080        | 0.317 | -0.091 | 0.204            | -0.067        | 0.201            | -0.111        | 0.194        | -0.109        |
| L Posterior cingulate        | 0.860 | -0.008 | 0.083            | -0.112        | 0.241 | -0.119 | 0.107            | -0.098        | 0.127            | -0.157        | 0.376        | -0.099        |
| R Posterior cingulate        | 0.465 | -0.033 | 0.053            | -0.116        | 0.183 | -0.124 | 0.008            | -0.147        | 0.008            | -0.247        | 0.183        | -0.120        |
| L Precentral                 | 0.388 | 0.042  | 0.021            | -0.152        | 0.144 | -0.152 | 0.025            | -0.131        | 0.072            | -0.177        | 0.182        | -0.125        |
| R Precentral                 | 0.937 | 0.004  | 0.047            | -0.136        | 0.472 | -0.077 | 0.048            | -0.116        | 0.480            | -0.069        | 0.952        | -0.006        |
| L Precuneus                  | 0.738 | -0.015 | 0.002            | -0.202        | 0.107 | -0.163 | 0.001            | -0.194        | 0.126            | -0.147        | 0.582        | -0.054        |
| R Precuneus                  | 0.533 | -0.029 | <b>0.001</b>     | <b>-0.216</b> | 0.047 | -0.203 | 0.004            | -0.166        | 0.183            | -0.129        | 0.545        | -0.057        |
| L Rostral anterior cingulate | 0.362 | 0.046  | 0.950            | -0.004        | 0.393 | -0.088 | 0.382            | -0.058        | 0.133            | -0.164        | 0.150        | -0.166        |
| R Rostral anterior cingulate | 0.793 | 0.013  | 0.342            | 0.061         | 0.159 | 0.140  | 0.030            | 0.129         | 0.524            | 0.063         | 0.151        | -0.141        |
| L Rostral middle frontal     | 0.460 | 0.033  | 0.037            | -0.129        | 0.443 | -0.073 | 0.001            | -0.186        | 0.069            | -0.169        | 0.628        | -0.047        |
| R Rostral middle frontal     | 0.490 | -0.028 | 0.047            | -0.114        | 0.041 | -0.179 | 0.209            | -0.064        | 0.009            | -0.218        | 0.002        | -0.278        |
| L Superior frontal           | 0.801 | 0.012  | 0.037            | -0.141        | 0.370 | -0.095 | 0.023            | -0.141        | 0.244            | -0.120        | 0.985        | -0.002        |
| R Superior frontal           | 0.642 | -0.021 | 0.010            | -0.163        | 0.473 | -0.072 | 0.063            | -0.105        | 0.832            | -0.020        | 0.945        | -0.006        |
| L Superior parietal          | 0.369 | -0.042 | 0.008            | -0.176        | 0.265 | -0.112 | 0.017            | -0.135        | 0.526            | -0.058        | 0.828        | -0.021        |
| R Superior parietal          | 0.884 | -0.006 | 0.042            | -0.119        | 0.583 | -0.051 | 0.024            | -0.122        | 0.545            | -0.054        | 0.759        | -0.026        |
| L Superior temporal          | 0.920 | -0.005 | <b>&lt;0.001</b> | <b>-0.276</b> | 0.092 | -0.187 | 0.001            | -0.206        | 0.009            | -0.257        | 0.131        | -0.168        |
| R Superior temporal          | 0.245 | -0.049 | <b>0.001</b>     | <b>-0.201</b> | 0.043 | -0.186 | 0.022            | -0.115        | 0.034            | -0.178        | 0.081        | -0.144        |
| L Supramarginal              | 0.569 | -0.028 | <b>&lt;0.001</b> | <b>-0.245</b> | 0.178 | -0.145 | 0.001            | -0.200        | 0.018            | -0.231        | 0.249        | -0.111        |
| R Supramarginal              | 0.364 | -0.044 | 0.002            | -0.200        | 0.002 | -0.328 | 0.006            | -0.165        | <b>0.001</b>     | <b>-0.337</b> | 0.018        | -0.229        |
| L Temporal pole              | 0.322 | -0.053 | 0.307            | -0.076        | 0.017 | -0.269 | 0.919            | 0.007         | 0.075            | -0.193        | 0.066        | -0.229        |

|                       |       |        |       |        |       |        |       |        |       |        |       |        |
|-----------------------|-------|--------|-------|--------|-------|--------|-------|--------|-------|--------|-------|--------|
| R Temporal pole       | 0.154 | -0.069 | 0.073 | -0.120 | 0.113 | -0.160 | 0.259 | -0.067 | 0.025 | -0.218 | 0.133 | -0.143 |
| L Transverse temporal | 0.401 | -0.044 | 0.075 | -0.125 | 0.026 | -0.252 | 0.651 | -0.028 | 0.264 | -0.117 | 0.044 | -0.202 |
| R Transverse temporal | 0.161 | -0.054 | 0.003 | -0.157 | 0.173 | -0.114 | 0.083 | -0.082 | 0.525 | -0.050 | 0.513 | -0.045 |

**Supplementary Table 11b: Cortical surface area results - Group differences corrected for DURILL across HY stages**

|                             | HY1 vs HY2   |               | HY1 vs HY3   |               | HY1 vs HY4-5 |          | HY2 vs HY3       |               | HY2 vs HY4 |          | HY3 vs HY4 |          |
|-----------------------------|--------------|---------------|--------------|---------------|--------------|----------|------------------|---------------|------------|----------|------------|----------|
|                             | <i>p</i>     | <i>d</i>      | <i>p</i>     | <i>d</i>      | <i>p</i>     | <i>d</i> | <i>p</i>         | <i>d</i>      | <i>p</i>   | <i>d</i> | <i>p</i>   | <i>d</i> |
| L Banks STS                 | 0.034        | 0.125         | 0.085        | -0.138        | 0.375        | -0.110   | 0.009            | -0.185        | 0.304      | -0.120   | 0.685      | 0.049    |
| R Banks STS                 | 0.034        | 0.115         | 0.186        | -0.102        | 0.547        | -0.071   | 0.006            | -0.183        | 0.141      | -0.160   | 0.655      | -0.056   |
| L Caudal anterior cingulate | 0.252        | 0.063         | 0.974        | 0.002         | 0.769        | -0.034   | 0.051            | -0.130        | 0.061      | -0.208   | 0.579      | -0.071   |
| R Caudal anterior cingulate | 0.748        | 0.018         | 0.725        | -0.027        | 0.284        | -0.127   | 0.822            | -0.015        | 0.602      | 0.057    | 0.892      | -0.017   |
| L Caudal middle frontal     | 0.228        | -0.066        | 0.391        | -0.064        | 0.780        | -0.032   | 0.177            | -0.089        | 0.867      | 0.018    | 0.056      | 0.233    |
| R Caudal middle frontal     | 0.567        | -0.031        | 0.189        | -0.102        | 0.611        | -0.060   | 0.056            | -0.128        | 0.996      | 0.001    | 0.092      | 0.211    |
| L Cuneus                    | 0.446        | -0.044        | 0.562        | -0.048        | 0.492        | 0.085    | 0.785            | -0.020        | 0.613      | 0.059    | 0.082      | 0.236    |
| R Cuneus                    | 0.694        | 0.023         | 0.237        | -0.096        | 0.473        | -0.089   | 0.041            | -0.145        | 0.333      | -0.114   | 0.347      | 0.125    |
| L Entorhinal                | 0.729        | 0.019         | 0.649        | -0.034        | 0.256        | -0.132   | 0.620            | -0.033        | 0.212      | -0.138   | 0.482      | -0.082   |
| R Entorhinal                | 0.423        | 0.045         | 0.806        | -0.019        | 0.619        | -0.059   | 0.066            | -0.124        | 0.429      | -0.087   | 0.749      | 0.040    |
| L Frontal pole              | 0.521        | 0.032         | 0.026        | -0.153        | 0.816        | -0.024   | 0.006            | -0.166        | 0.901      | 0.012    | 0.074      | 0.182    |
| R Frontal pole              | 0.060        | 0.099         | 0.430        | 0.055         | 0.350        | 0.104    | 0.138            | -0.091        | 0.952      | 0.006    | 0.378      | 0.099    |
| L Fusiform                  | 0.797        | 0.014         | 0.003        | -0.225        | 0.013        | -0.293   | 0.009            | -0.170        | 0.147      | -0.154   | 0.728      | 0.039    |
| R Fusiform                  | 0.899        | -0.007        | 0.007        | -0.206        | 0.016        | -0.281   | 0.020            | -0.153        | 0.112      | -0.171   | 0.748      | -0.040   |
| L Inferior parietal         | 0.839        | 0.011         | 0.038        | -0.162        | 0.028        | -0.262   | 0.009            | -0.171        | 0.094      | -0.178   | 0.917      | -0.013   |
| R Inferior parietal         | 0.642        | -0.026        | 0.089        | -0.130        | 0.343        | -0.110   | 0.014            | -0.162        | 0.066      | -0.199   | 0.934      | 0.010    |
| L Inferior temporal         | 0.518        | -0.035        | 0.018        | -0.186        | 0.026        | -0.260   | 0.108            | -0.107        | 0.047      | -0.211   | 0.596      | -0.064   |
| R Inferior temporal         | 0.883        | -0.008        | 0.006        | -0.216        | 0.246        | -0.137   | 0.015            | -0.161        | 0.154      | -0.153   | 0.618      | 0.062    |
| L Insula                    | 0.946        | -0.003        | 0.817        | -0.017        | 0.362        | -0.101   | 0.263            | -0.068        | 0.054      | -0.190   | 0.974      | 0.004    |
| R Insula                    | 0.821        | 0.012         | 0.304        | -0.075        | 0.413        | -0.093   | 0.059            | -0.119        | 0.029      | -0.227   | 0.723      | -0.041   |
| L Isthmus cingulate         | 0.267        | -0.060        | 0.552        | -0.044        | 0.177        | -0.159   | 0.714            | -0.024        | 0.943      | -0.008   | 0.399      | 0.103    |
| R Isthmus cingulate         | 0.545        | -0.033        | 0.657        | -0.032        | 0.750        | -0.037   | 0.578            | -0.036        | 0.262      | 0.122    | 0.052      | 0.226    |
| L Lateral occipital         | 0.310        | -0.054        | 0.024        | -0.169        | 0.024        | -0.262   | 0.002            | -0.205        | 0.093      | -0.185   | 0.498      | 0.087    |
| R Lateral occipital         | 0.370        | -0.049        | 0.042        | -0.154        | 0.109        | -0.185   | 0.032            | -0.143        | 0.542      | -0.068   | 0.215      | 0.157    |
| L Lateral orbitofrontal     | 0.425        | -0.044        | 0.331        | -0.076        | 0.056        | -0.233   | 0.618            | -0.033        | 0.088      | -0.187   | 0.367      | -0.112   |
| R Lateral orbitofrontal     | 0.081        | -0.094        | 0.047        | -0.151        | 0.184        | -0.157   | 0.274            | -0.071        | 0.205      | -0.136   | 0.938      | -0.009   |
| L Lingual                   | <b>0.001</b> | <b>-0.188</b> | 0.001        | -0.257        | 0.210        | -0.148   | 0.757            | -0.021        | 0.955      | 0.006    | 0.542      | 0.081    |
| R Lingual                   | 0.024        | -0.124        | 0.012        | -0.192        | 0.273        | -0.129   | 0.153            | -0.095        | 0.864      | 0.019    | 0.220      | 0.160    |
| L Medial orbitofrontal      | 0.528        | 0.034         | 0.046        | -0.148        | 0.053        | -0.222   | 0.005            | -0.182        | 0.064      | -0.199   | 0.919      | 0.012    |
| R Medial orbitofrontal      | 0.917        | -0.006        | 0.279        | -0.080        | 0.323        | -0.112   | 0.283            | -0.070        | 0.883      | 0.016    | 0.044      | 0.239    |
| L Middle temporal           | 0.542        | 0.034         | 0.273        | -0.087        | 0.725        | -0.042   | 0.066            | -0.123        | 0.693      | -0.043   | 0.361      | 0.116    |
| R Middle temporal           | 0.320        | 0.054         | <b>0.001</b> | <b>-0.262</b> | 0.013        | -0.291   | <b>&lt;0.001</b> | <b>-0.243</b> | 0.043      | -0.215   | 0.313      | 0.122    |
| L Paracentral               | 0.824        | 0.012         | 0.860        | 0.013         | 0.909        | 0.013    | 0.847            | -0.013        | 0.551      | -0.065   | 0.766      | 0.035    |
| R Paracentral               | 0.861        | 0.010         | 0.915        | 0.008         | 0.604        | -0.060   | 0.942            | -0.005        | 0.509      | -0.071   | 0.475      | 0.086    |
| L Parahippocampal           | 0.777        | 0.015         | 0.107        | -0.124        | 0.318        | -0.118   | 0.051            | -0.126        | 0.692      | -0.042   | 0.323      | 0.124    |
| R Parahippocampal           | 0.223        | 0.065         | 0.075        | -0.139        | 0.503        | 0.079    | 0.006            | -0.179        | 0.923      | 0.010    | 0.348      | 0.120    |
| L Pars opercularis          | 0.574        | -0.031        | 0.093        | -0.128        | 0.112        | -0.190   | 0.116            | -0.104        | 0.382      | -0.096   | 0.776      | 0.035    |
| R Pars opercularis          | 0.013        | -0.139        | 0.001        | -0.253        | 0.016        | -0.291   | 0.134            | -0.101        | 0.046      | -0.223   | 0.244      | -0.147   |
| L Pars orbitalis            | 0.541        | -0.033        | 0.305        | -0.077        | 0.225        | -0.140   | 0.954            | -0.004        | 0.240      | -0.124   | 0.607      | -0.060   |

|                              |       |        |       |        |       |        |       |        |       |        |       |        |
|------------------------------|-------|--------|-------|--------|-------|--------|-------|--------|-------|--------|-------|--------|
| R Pars orbitalis             | 0.993 | <0.001 | 0.094 | -0.127 | 0.051 | -0.229 | 0.029 | -0.143 | 0.029 | -0.236 | 0.778 | -0.034 |
| L Pars triangularis          | 0.282 | -0.060 | 0.347 | -0.072 | 0.088 | -0.203 | 0.860 | 0.012  | 0.681 | -0.046 | 0.387 | -0.109 |
| R Pars triangularis          | 0.317 | -0.055 | 0.120 | -0.119 | 0.147 | -0.169 | 0.609 | -0.034 | 0.500 | -0.074 | 0.519 | -0.079 |
| L Pericalcarine              | 0.072 | -0.102 | 0.140 | -0.120 | 0.726 | 0.043  | 0.557 | 0.042  | 0.187 | 0.153  | 0.364 | 0.124  |
| R Pericalcarine              | 0.030 | -0.124 | 0.130 | -0.121 | 0.657 | -0.055 | 0.594 | 0.038  | 0.927 | 0.011  | 0.583 | 0.076  |
| L Postcentral                | 0.959 | -0.003 | 0.049 | -0.156 | 0.033 | -0.257 | 0.001 | -0.219 | 0.050 | -0.214 | 0.531 | 0.080  |
| R Postcentral                | 0.214 | 0.071  | 0.345 | -0.074 | 0.043 | -0.241 | 0.068 | -0.126 | 0.011 | -0.285 | 0.982 | 0.003  |
| L Posterior cingulate        | 0.632 | 0.026  | 0.599 | -0.040 | 0.122 | -0.180 | 0.202 | -0.085 | 0.157 | -0.155 | 0.753 | -0.040 |
| R Posterior cingulate        | 0.603 | 0.027  | 0.893 | -0.010 | 0.074 | -0.208 | 0.310 | -0.065 | 0.032 | -0.230 | 0.558 | -0.075 |
| L Precentral                 | 0.548 | 0.032  | 0.468 | -0.055 | 0.643 | -0.054 | 0.048 | -0.129 | 0.762 | -0.032 | 0.153 | 0.173  |
| R Precentral                 | 0.856 | 0.010  | 0.109 | -0.125 | 0.869 | -0.019 | 0.006 | -0.176 | 0.783 | -0.029 | 0.089 | 0.207  |
| L Precuneus                  | 0.481 | 0.038  | 0.159 | -0.108 | 0.051 | -0.229 | 0.008 | -0.176 | 0.013 | -0.269 | 0.993 | 0.001  |
| R Precuneus                  | 0.220 | 0.066  | 0.355 | -0.070 | 0.351 | -0.108 | 0.032 | -0.140 | 0.040 | -0.222 | 0.802 | -0.032 |
| L Rostral anterior cingulate | 0.152 | 0.079  | 0.463 | 0.055  | 0.339 | 0.107  | 0.738 | 0.022  | 0.646 | -0.051 | 0.720 | -0.045 |
| R Rostral anterior cingulate | 0.744 | 0.017  | 0.488 | -0.052 | 0.182 | -0.154 | 0.422 | -0.052 | 0.906 | 0.013  | 0.940 | -0.009 |
| L Rostral middle frontal     | 0.122 | -0.082 | 0.110 | -0.120 | 0.597 | -0.061 | 0.097 | -0.104 | 0.732 | -0.035 | 0.236 | 0.140  |
| R Rostral middle frontal     | 0.479 | -0.037 | 0.566 | -0.043 | 0.583 | -0.063 | 0.180 | -0.085 | 0.844 | -0.021 | 0.089 | 0.203  |
| L Superior frontal           | 0.107 | -0.083 | 0.211 | -0.093 | 0.471 | -0.082 | 0.416 | -0.051 | 0.874 | -0.016 | 0.553 | 0.071  |
| R Superior frontal           | 0.443 | -0.041 | 0.143 | -0.110 | 0.531 | -0.071 | 0.120 | -0.100 | 0.409 | -0.086 | 0.347 | 0.114  |
| L Superior parietal          | 0.237 | -0.065 | 0.029 | -0.170 | 0.415 | -0.094 | 0.038 | -0.138 | 0.309 | -0.109 | 0.191 | 0.167  |
| R Superior parietal          | 0.256 | -0.062 | 0.196 | -0.099 | 0.035 | -0.244 | 0.065 | -0.122 | 0.031 | -0.232 | 0.821 | 0.028  |
| L Superior temporal          | 0.409 | 0.046  | 0.952 | 0.005  | 0.366 | -0.105 | 0.390 | -0.059 | 0.260 | -0.121 | 0.986 | -0.002 |
| R Superior temporal          | 0.028 | 0.118  | 0.626 | -0.037 | 0.269 | -0.127 | 0.005 | -0.186 | 0.093 | -0.180 | 0.609 | 0.064  |
| L Supramarginal              | 0.872 | -0.009 | 0.258 | -0.088 | 0.005 | -0.327 | 0.014 | -0.163 | 0.003 | -0.314 | 0.933 | 0.011  |
| R Supramarginal              | 0.190 | 0.072  | 0.591 | -0.042 | 0.349 | -0.110 | 0.012 | -0.168 | 0.018 | -0.256 | 0.750 | -0.041 |
| L Temporal pole              | 0.637 | -0.026 | 0.096 | -0.131 | 0.681 | -0.050 | 0.335 | -0.066 | 0.539 | 0.069  | 0.423 | 0.102  |
| R Temporal pole              | 0.681 | -0.023 | 0.825 | 0.016  | 0.679 | 0.048  | 0.658 | 0.030  | 0.294 | 0.116  | 0.424 | 0.097  |
| L Transverse temporal        | 0.707 | 0.020  | 0.514 | -0.049 | 0.979 | 0.003  | 0.852 | -0.012 | 0.970 | -0.004 | 0.393 | 0.107  |
| R Transverse temporal        | 0.863 | 0.009  | 0.045 | -0.155 | 0.045 | -0.239 | 0.425 | -0.052 | 0.479 | -0.076 | 0.999 | <0.001 |

**Supplementary Table 11c: Subcortical volume results - Group differences corrected for DURILL across HY stages**

|                     | HY1 vs HY2 |          | HY1 vs HY3   |               | HY1 vs HY4-5     |               | HY2 vs HY3       |               | HY2 vs HY4       |               | HY3 vs HY4 |          |
|---------------------|------------|----------|--------------|---------------|------------------|---------------|------------------|---------------|------------------|---------------|------------|----------|
|                     | <i>p</i>   | <i>d</i> | <i>p</i>     | <i>d</i>      | <i>p</i>         | <i>d</i>      | <i>p</i>         | <i>d</i>      | <i>p</i>         | <i>d</i>      | <i>p</i>   | <i>d</i> |
| <b>L Amygdala</b>   | 0.766      | 0.014    | <b>0.002</b> | <b>-0.213</b> | <b>&lt;0.001</b> | <b>-0.454</b> | <b>&lt;0.001</b> | <b>-0.239</b> | <b>&lt;0.001</b> | <b>-0.359</b> | 0.787      | -0.033   |
| R Amygdala          | 0.365      | -0.042   | 0.009        | -0.173        | <b>0.001</b>     | <b>-0.327</b> | 0.017            | -0.144        | 0.010            | -0.252        | 0.808      | -0.028   |
| L Caudate nucleus   | 0.065      | -0.096   | 0.114        | -0.115        | 0.037            | -0.234        | 0.174            | -0.086        | 0.125            | -0.160        | 0.847      | 0.024    |
| R Caudate nucleus   | 0.151      | -0.074   | 0.217        | -0.087        | 0.226            | -0.133        | 0.093            | -0.104        | 0.467            | -0.076        | 0.360      | 0.115    |
| L Globus pallidus   | 0.774      | 0.014    | 0.876        | 0.010         | 0.114            | -0.163        | 0.721            | -0.022        | 0.092            | -0.168        | 0.193      | -0.133   |
| R Globus pallidus   | 0.307      | 0.051    | 0.644        | 0.031         | 0.304            | -0.109        | 0.157            | -0.085        | 0.033            | -0.212        | 0.248      | -0.115   |
| L Hippocampus       | 0.215      | -0.063   | 0.011        | -0.186        | <b>0.003</b>     | <b>-0.335</b> | <b>0.001</b>     | <b>-0.201</b> | <b>&lt;0.001</b> | <b>-0.393</b> | 0.039      | -0.253   |
| R Hippocampus       | 0.126      | -0.075   | <b>0.002</b> | <b>-0.227</b> | <b>&lt;0.001</b> | <b>-0.439</b> | <b>0.002</b>     | <b>-0.191</b> | <b>&lt;0.001</b> | <b>-0.425</b> | 0.072      | -0.214   |
| L Lateral ventricle | 0.710      | -0.021   | 0.022        | 0.175         | 0.022            | 0.269         | 0.013            | 0.168         | 0.006            | 0.306         | 0.077      | 0.221    |
| R Lateral ventricle | 0.661      | -0.025   | 0.074        | 0.136         | 0.007            | 0.321         | 0.067            | 0.124         | <b>0.001</b>     | <b>0.360</b>  | 0.019      | 0.290    |
| L Nucleus accumbens | 0.428      | 0.039    | 0.130        | -0.101        | 0.150            | -0.150        | 0.060            | -0.109        | 0.009            | -0.254        | 0.358      | -0.098   |
| R Nucleus accumbens | 0.651      | -0.023   | 0.282        | -0.075        | 0.005            | -0.306        | 0.079            | -0.106        | <b>0.001</b>     | <b>-0.335</b> | 0.127      | -0.178   |
| L Putamen           | 0.748      | 0.016    | 0.098        | -0.117        | 0.015            | -0.268        | 0.005            | -0.174        | <b>0.003</b>     | <b>-0.306</b> | 0.146      | -0.174   |

|            |       |        |       |        |       |        |       |        |              |               |       |        |
|------------|-------|--------|-------|--------|-------|--------|-------|--------|--------------|---------------|-------|--------|
| R Putamen  | 0.983 | 0.001  | 0.368 | -0.063 | 0.023 | -0.250 | 0.075 | -0.106 | <b>0.001</b> | <b>-0.340</b> | 0.018 | -0.273 |
| L Thalamus | 0.213 | -0.055 | 0.061 | -0.123 | 0.044 | -0.209 | 0.200 | -0.071 | 0.024        | -0.205        | 0.120 | -0.166 |
| R Thalamus | 0.598 | -0.024 | 0.023 | -0.146 | 0.126 | -0.154 | 0.031 | -0.126 | 0.021        | -0.217        | 0.348 | -0.100 |

### Supplementary table 12: MoCA sample characteristics

| Cohort              | N           | Mean age, years (SD) | % Female  | DURILL, years (SD) | MoCA (SD)          |
|---------------------|-------------|----------------------|-----------|--------------------|--------------------|
| Amsterdam II        | 61          | 62.5 (7.08)          | 39        | 5.3 (3.54)         | 26.3 (2.15)        |
| BE I                | 2           | 73 (4.24)            | 50        | 15.5 (4.95)        | 23 (5.66)          |
| Charlottesville I   | 86          | 63.7 (8.45)          | 23        | 9.9 (5.42)         | 24.9 (3.44)        |
| Charlottesville II  | 25          | 60.6 (9.36)          | 12        | 9.5 (3.98)         | 24.3 (3.45)        |
| Charlottesville III | 18          | 69.3 (6.24)          | 33        | 8.4 (3.41)         | 23.4 (4.6)         |
| NW-England I        | 32          | 69.9 (8.58)          | 19        | 6.8 (4.42)         | 24.8 (4.25)        |
| NW-England II       | 12          | 64.8 (6.13)          | 33        | 10.3 (5.86)        | 26.3 (2.93)        |
| Oxford DISCOVERY    | 113         | 63.7 (9.87)          | 36        | 2.3 (1.57)         | 26.6 (2.72)        |
| PDNZ                | 207         | 69.4 (7.79)          | 27        | 5.8 (5.58)         | 23.6 (4.18)        |
| PPMI 1              | 15          | 62.9 (8.19)          | 47        | 0.6 (0.52)         | 27.1 (1.91)        |
| PPMI 2              | 15          | 62.4 (8.31)          | 67        | 0.7 (0.77)         | 26.3 (2.09)        |
| PPMI 3              | 17          | 60.2 (10.46)         | 29        | 0.8 (0.83)         | 27.6 (1.9)         |
| PPMI 4              | 10          | 66.4 (10.72)         | 60        | 0.9 (0.76)         | 28.4 (1.17)        |
| PPMI 5              | 15          | 64.3 (12.07)         | 33        | 0.8 (0.65)         | 26.9 (2.17)        |
| PPMI 6              | 2           | 61.3 (7.78)          | 0         | 1.3 (0.14)         | 25 (1.41)          |
| PPMI 7              | 11          | 59.1 (12.53)         | 18        | 0.5 (0.34)         | 29 (1.1)           |
| PPMI 8              | 13          | 66.4 (7.19)          | 46        | 0.5 (0.27)         | 27.9 (1.5)         |
| PPMI 9              | 18          | 63.2 (7.85)          | 39        | 0.6 (0.39)         | 28.2 (1.76)        |
| PPMI 10             | 21          | 63.8 (9.82)          | 33        | 0.3 (0.23)         | 26.4 (2.94)        |
| PPMI 11             | 6           | 60.6 (11.09)         | 67        | 0.2 (0.04)         | 27.5 (1.52)        |
| PPMI 12             | 21          | 59.5 (10.55)         | 33        | 0.6 (0.57)         | 28.4 (1.66)        |
| PPMI 13             | 6           | 59.6 (12.46)         | 17        | 0.2 (0.08)         | 27 (2.37)          |
| PPMI 14             | 62          | 60.7 (10.16)         | 29        | 0.4 (0.38)         | 25.8 (2.68)        |
| PPMI 15             | 15          | 58.5 (7.83)          | 20        | 0.5 (0.44)         | 27.8 (1.47)        |
| PPMI 16             | 15          | 62.0 (7.51)          | 27        | 0.7 (0.68)         | 27.7 (1.53)        |
| PPMI 17             | 19          | 66.4 (9.08)          | 47        | 0.7 (0.47)         | 26.6 (2.29)        |
| PPMI 18             | 22          | 58.3 (9.23)          | 23        | 0.4 (0.52)         | 28.9 (1.19)        |
| PPMI 19             | 19          | 59.3 (9.3)           | 26        | 0.7 (0.69)         | 27.4 (1.54)        |
| PPMI 20             | 3           | 63.6 (7.71)          | 0         | 0.3 (0.06)         | 25.3 (2.52)        |
| PPMI 21             | 22          | 62.0 (9.14)          | 41        | 0.8 (0.80)         | 26.1 (2.09)        |
| Stanford            | 43          | 69.0 (8.17)          | 49        | 5.6 (3.47)         | 23.9 (5.21)        |
| UDALL/U19           | 111         | 66.3 (7.88)          | 32        | 7.3 (5.50)         | 25.5 (3.31)        |
| <b>Total</b>        | <b>1057</b> | <b>64.8 (9.28)</b>   | <b>32</b> | <b>4.4 (5.05)</b>  | <b>25.6 (3.55)</b> |

Demographics for the MoCA regression analysis. SD – standard deviation, DURILL – duration of illness, MoCA – Montreal Cognitive Assessment.

### Supplementary table 13: DURILL sample characteristics

| Cohort       | N   | Mean age, years (SD) | % Female | DURILL, years (SD) | MoCA (SD)   |
|--------------|-----|----------------------|----------|--------------------|-------------|
| Amsterdam I  | 104 | 63.1 (10.87)         | 38       | 2.1 (3.39)         | NA          |
| Amsterdam II | 61  | 62.5 (7.08)          | 39       | 5.3 (3.54)         | 26.3 (2.15) |

|                     |             |                    |           |                   |                    |
|---------------------|-------------|--------------------|-----------|-------------------|--------------------|
| BE I                | 52          | 62.9 (10.38)       | 52        | 12.4 (4.29)       | 23 (5.66)          |
| BE II               | 3           | 59.7 (6.66)        | 67        | 11.3 (7.57)       | NA                 |
| CGU                 | 291         | 60.6 (9.37)        | 45        | 8.7 (6.33)        | NA                 |
| Charlottesville I   | 116         | 63.7 (8.52)        | 28        | 9.7 (5.09)        | 24.9 (3.44)        |
| Charlottesville II  | 37          | 62.4 (9.59)        | 14        | 8.7 (3.64)        | 24.3 (3.45)        |
| Charlottesville III | 24          | 70.8 (6.77)        | 29        | 7.7 (3.23)        | 23.4 (4.6)         |
| Donders             | 57          | 61 (10.18)         | 46        | 4.4 (3.79)        | NA                 |
| Liege I             | 30          | 65.9 (6.61)        | 37        | 7.2 (5.32)        | NA                 |
| Liege II            | 45          | 66.9 (8.24)        | 44        | 6 (3.93)          | NA                 |
| Milan               | 43          | 57.8 (7.8)         | 33        | 11.4 (3.38)       | NA                 |
| NW-England I        | 32          | 69.9 (8.58)        | 19        | 6.8 (4.42)        | 24.8 (4.25)        |
| NW-England II       | 14          | 65 (5.67)          | 29        | 9.2 (6.02)        | 26.3 (2.93)        |
| Oxford DISCOVERY    | 114         | 63.9 (10.09)       | 36        | 2.3 (1.58)        | 26.6 (2.72)        |
| PDNZ                | 208         | 69.4 (7.79)        | 26        | 5.7 (5.57)        | 23.6 (4.19)        |
| PPMI 1              | 15          | 62.9 (8.19)        | 47        | 0.6 (0.52)        | 27.1 (1.91)        |
| PPMI 2              | 15          | 62.4 (8.31)        | 67        | 0.7 (0.77)        | 26.3 (2.09)        |
| PPMI 3              | 17          | 60.2 (10.46)       | 29        | 0.8 (0.83)        | 27.6 (1.9)         |
| PPMI 4              | 10          | 66.4 (10.72)       | 60        | 0.9 (0.76)        | 28.4 (1.17)        |
| PPMI 5              | 15          | 64.3 (12.07)       | 33        | 0.8 (0.65)        | 26.9 (2.17)        |
| PPMI 6              | 2           | 61.3 (7.78)        | 0         | 1.3 (0.14)        | 25 (1.41)          |
| PPMI 7              | 11          | 59.1 (12.53)       | 18        | 0.5 (0.34)        | 29 (1.1)           |
| PPMI 8              | 13          | 66.4 (7.19)        | 46        | 0.5 (0.27)        | 27.9 (1.5)         |
| PPMI 9              | 18          | 63.2 (7.85)        | 39        | 0.6 (0.39)        | 28.2 (1.76)        |
| PPMI 10             | 21          | 63.8 (9.82)        | 33        | 0.3 (0.23)        | 26.4 (2.94)        |
| PPMI 11             | 6           | 60.6 (11.09)       | 67        | 0.2 (0.04)        | 27.5 (1.52)        |
| PPMI 12             | 21          | 59.5 (10.55)       | 33        | 0.6 (0.57)        | 28.4 (1.66)        |
| PPMI 13             | 6           | 59.6 (12.46)       | 17        | 0.2 (0.08)        | 27 (2.37)          |
| PPMI 14             | 62          | 60.7 (10.16)       | 29        | 0.4 (0.38)        | 25.8 (2.68)        |
| PPMI 15             | 15          | 58.5 (7.83)        | 20        | 0.5 (0.44)        | 27.8 (1.47)        |
| PPMI 16             | 15          | 62 (7.51)          | 27        | 0.7 (0.68)        | 27.7 (1.53)        |
| PPMI 17             | 19          | 66.4 (9.08)        | 47        | 0.7 (0.47)        | 26.6 (2.29)        |
| PPMI 18             | 22          | 58.3 (9.23)        | 23        | 0.4 (0.52)        | 28.9 (1.19)        |
| PPMI 19             | 19          | 59.3 (9.3)         | 26        | 0.7 (0.69)        | 27.4 (1.54)        |
| PPMI 20             | 3           | 63.6 (7.71)        | 0         | 0.3 (0.06)        | 25.3 (2.52)        |
| PPMI 21             | 22          | 62 (9.14)          | 41        | 0.8 (0.8)         | 26.1 (2.09)        |
| PROMOVE/ASPS I      | 100         | 63.2 (10.15)       | 29        | 4.7 (4.77)        | NA                 |
| PROMOVE/ASPS II     | 23          | 64 (9.9)           | 22        | 4 (5.69)          | NA                 |
| Rome SLF            | 225         | 62.7 (10.14)       | 36        | 4.9 (4.17)        | NA                 |
| Stanford            | 44          | 68.6 (8.49)        | 50        | 5.6 (3.44)        | 23.9 (5.21)        |
| Tao Wu              | 19          | 65 (4.45)          | 47        | 5.3 (4)           | NA                 |
| UDALL/U19           | 112         | 66.4 (7.87)        | 32        | 7.3 (5.48)        | 25.5 (3.31)        |
| UNICAMP             | 110         | 59.9 (10.2)        | 34        | 7.3 (6.41)        | NA                 |
| <b>Total</b>        | <b>2211</b> | <b>63.4 (9.69)</b> | <b>35</b> | <b>5.5 (5.47)</b> | <b>25.6 (3.55)</b> |

Demographics for the duration of illness regression analysis. SD – standard deviation, DURILL – duration of illness, MoCA – Montreal Cognitive Assessment.

## Supplementary table 14a: Results of regression analysis of duration of illness and cortical thickness

| ROI Thickness | <i>p</i> | <i>r</i> | <i>b</i> | SE    | Lower CI | Upper CI | NPD  |
|---------------|----------|----------|----------|-------|----------|----------|------|
| L Banks STS   | 0.019    | -0.042   | -0.002   | 0.001 | -0.004   | <0.001   | 1933 |
| R Banks STS   | 0.126    | -0.026   | -0.001   | 0.001 | -0.003   | <0.001   | 2071 |

|                              |                  |               |               |              |               |               |             |
|------------------------------|------------------|---------------|---------------|--------------|---------------|---------------|-------------|
| L Caudal anterior cingulate  | 0.386            | 0.016         | 0.001         | 0.001        | -0.001        | 0.004         | 2156        |
| R Caudal anterior cingulate  | 0.885            | 0.003         | <0.001        | 0.001        | -0.002        | 0.003         | 2154        |
| L Caudal middle frontal      | 0.053            | -0.035        | -0.001        | 0.001        | -0.003        | <0.001        | 2163        |
| R Caudal middle frontal      | 0.117            | -0.029        | -0.001        | 0.001        | -0.003        | <0.001        | 2158        |
| L Cuneus                     | 0.345            | -0.017        | -0.001        | 0.001        | -0.002        | 0.001         | 2016        |
| R Cuneus                     | 0.990            | <0.001        | <0.001        | 0.001        | -0.001        | 0.001         | 1985        |
| L Entorhinal                 | 0.081            | -0.033        | -0.003        | 0.002        | -0.006        | <0.001        | 2123        |
| R Entorhinal                 | 0.006            | -0.044        | -0.005        | 0.002        | -0.008        | -0.001        | 2068        |
| L Frontal pole               | 0.727            | -0.007        | <0.001        | 0.001        | -0.003        | 0.002         | 2168        |
| R Frontal pole               | 0.739            | 0.006         | <0.001        | 0.001        | -0.002        | 0.003         | 2164        |
| L Fusiform                   | 0.001            | -0.056        | -0.003        | 0.001        | -0.004        | -0.001        | 2135        |
| R Fusiform                   | 0.006            | -0.041        | -0.002        | 0.001        | -0.004        | -0.001        | 2147        |
| <b>L Inferior parietal</b>   | <b>&lt;0.001</b> | <b>-0.063</b> | <b>-0.003</b> | <b>0.001</b> | <b>-0.004</b> | <b>-0.001</b> | <b>2079</b> |
| R Inferior parietal          | 0.001            | -0.057        | -0.002        | 0.001        | -0.004        | -0.001        | 2091        |
| L Inferior temporal          | 0.023            | -0.040        | -0.002        | 0.001        | -0.004        | <0.001        | 2074        |
| R Inferior temporal          | 0.043            | -0.034        | -0.002        | 0.001        | -0.003        | <0.001        | 2101        |
| L Insula                     | 0.085            | -0.034        | -0.002        | 0.001        | -0.003        | <0.001        | 2163        |
| R Insula                     | 0.024            | -0.039        | -0.002        | 0.001        | -0.004        | <0.001        | 2153        |
| L Isthmus cingulate          | 0.071            | -0.035        | -0.002        | 0.001        | -0.004        | <0.001        | 2162        |
| R Isthmus cingulate          | 0.757            | 0.006         | <0.001        | 0.001        | -0.002        | 0.002         | 2158        |
| L Lateral occipital          | 0.177            | -0.025        | -0.001        | 0.001        | -0.002        | <0.001        | 2088        |
| R Lateral occipital          | 0.003            | -0.054        | -0.002        | 0.001        | -0.004        | -0.001        | 2105        |
| L Lateral orbitofrontal      | 0.287            | -0.018        | -0.001        | 0.001        | -0.002        | 0.001         | 2166        |
| R Lateral orbitofrontal      | 0.241            | -0.018        | -0.001        | 0.001        | -0.002        | 0.001         | 2163        |
| L Lingual                    | 0.447            | -0.014        | <0.001        | 0.001        | -0.002        | 0.001         | 2113        |
| R Lingual                    | 0.069            | -0.030        | -0.001        | 0.001        | -0.002        | <0.001        | 2076        |
| L Medial orbitofrontal       | 0.753            | -0.006        | <0.001        | 0.001        | -0.002        | 0.001         | 2146        |
| R Medial orbitofrontal       | 0.293            | -0.017        | -0.001        | 0.001        | -0.002        | 0.001         | 2140        |
| L Middle temporal            | 0.004            | -0.052        | -0.002        | 0.001        | -0.004        | -0.001        | 1970        |
| R Middle temporal            | 0.039            | -0.035        | -0.002        | 0.001        | -0.003        | <0.001        | 2088        |
| L Paracentral                | 0.543            | -0.011        | -0.001        | 0.001        | -0.002        | 0.001         | 2153        |
| R Paracentral                | 0.262            | -0.020        | -0.001        | 0.001        | -0.003        | 0.001         | 2141        |
| L Parahippocampal            | 0.101            | -0.031        | -0.002        | 0.001        | -0.005        | <0.001        | 2167        |
| R Parahippocampal            | 0.989            | <0.001        | <0.001        | 0.001        | -0.002        | 0.002         | 2156        |
| L Pars opercularis           | 0.008            | -0.047        | -0.002        | 0.001        | -0.003        | -0.001        | 2159        |
| R Pars opercularis           | 0.094            | -0.029        | -0.001        | 0.001        | -0.003        | <0.001        | 2155        |
| L Pars orbitalis             | 0.671            | -0.008        | <0.001        | 0.001        | -0.002        | 0.001         | 2157        |
| R Pars orbitalis             | 0.687            | -0.007        | <0.001        | 0.001        | -0.002        | 0.001         | 2154        |
| L Pars triangularis          | 0.004            | -0.050        | -0.002        | 0.001        | -0.004        | -0.001        | 2153        |
| R Pars triangularis          | 0.539            | -0.011        | <0.001        | 0.001        | -0.002        | 0.001         | 2142        |
| L Pericalcarine              | 0.296            | -0.018        | -0.001        | 0.001        | -0.002        | 0.001         | 2020        |
| R Pericalcarine              | 0.868            | 0.003         | <0.001        | 0.001        | -0.001        | 0.002         | 1956        |
| L Postcentral                | 0.020            | -0.041        | -0.001        | 0.001        | -0.003        | <0.001        | 2041        |
| R Postcentral                | 0.017            | -0.039        | -0.002        | 0.001        | -0.003        | <0.001        | 2037        |
| L Posterior cingulate        | 0.369            | -0.016        | -0.001        | 0.001        | -0.002        | 0.001         | 2168        |
| R Posterior cingulate        | 0.004            | -0.049        | -0.002        | 0.001        | -0.004        | -0.001        | 2167        |
| L Precentral                 | 0.042            | -0.036        | -0.002        | 0.001        | -0.003        | <0.001        | 2073        |
| R Precentral                 | 0.072            | -0.033        | -0.002        | 0.001        | -0.003        | <0.001        | 2084        |
| <b>L Precuneus</b>           | <b>&lt;0.001</b> | <b>-0.060</b> | <b>-0.002</b> | <b>0.001</b> | <b>-0.004</b> | <b>-0.001</b> | <b>2162</b> |
| <b>R Precuneus</b>           | <b>&lt;0.001</b> | <b>-0.060</b> | <b>-0.002</b> | <b>0.001</b> | <b>-0.004</b> | <b>-0.001</b> | <b>2164</b> |
| L Rostral anterior cingulate | 0.290            | -0.020        | -0.001        | 0.001        | -0.004        | 0.001         | 2145        |

|                              |                  |               |               |              |               |               |             |
|------------------------------|------------------|---------------|---------------|--------------|---------------|---------------|-------------|
| R Rostral anterior cingulate | 0.719            | 0.006         | <0.001        | 0.001        | -0.002        | 0.003         | 2142        |
| L Rostral middle frontal     | 0.075            | -0.029        | -0.001        | 0.001        | -0.002        | <0.001        | 2149        |
| R Rostral middle frontal     | 0.147            | -0.022        | -0.001        | 0.001        | -0.002        | <0.001        | 2157        |
| L Superior frontal           | 0.104            | -0.029        | -0.001        | 0.001        | -0.003        | <0.001        | 2119        |
| R Superior frontal           | 0.017            | -0.040        | -0.002        | 0.001        | -0.003        | <0.001        | 2122        |
| L Superior parietal          | 0.002            | -0.053        | -0.002        | 0.001        | -0.003        | -0.001        | 2098        |
| <b>R Superior parietal</b>   | <b>&lt;0.001</b> | <b>-0.058</b> | <b>-0.002</b> | <b>0.001</b> | <b>-0.004</b> | <b>-0.001</b> | <b>2117</b> |
| L Superior temporal          | 0.018            | -0.043        | -0.002        | 0.001        | -0.004        | <0.001        | 1892        |
| R Superior temporal          | 0.225            | -0.019        | -0.001        | 0.001        | -0.003        | 0.001         | 2010        |
| L Supramarginal              | 0.055            | -0.034        | -0.001        | 0.001        | -0.003        | <0.001        | 2051        |
| R Supramarginal              | 0.017            | -0.043        | -0.002        | 0.001        | -0.003        | <0.001        | 2076        |
| L Temporal pole              | 0.009            | -0.052        | -0.004        | 0.002        | -0.007        | -0.001        | 2077        |
| R Temporal pole              | 0.038            | -0.038        | -0.003        | 0.002        | -0.007        | <0.001        | 2083        |
| L Transverse temporal        | 0.002            | -0.058        | -0.003        | 0.001        | -0.005        | -0.001        | 2178        |
| R Transverse temporal        | 0.010            | -0.038        | -0.003        | 0.001        | -0.005        | -0.001        | 2175        |

Results of regression analysis of duration of illness and cortical thickness in PD sample. L – Left, R – Right, ROI – region of interest. Banks STS – Banks of the superior temporal sulcus. **Boldface** denotes significant results after Bonferroni correction.

## Supplementary table 14b: Results of regression analysis of duration of illness and surface area

| ROI Surface Area            | <i>p</i> | <i>r</i> | <b>b</b> | SE    | Lower CI | Upper CI | NPD  |
|-----------------------------|----------|----------|----------|-------|----------|----------|------|
| L Banks STS                 | 0.045    | -0.044   | -1.400   | 0.697 | -2.767   | -0.032   | 1931 |
| R Banks STS                 | 0.066    | -0.037   | -1.110   | 0.604 | -2.295   | 0.075    | 2072 |
| L Caudal anterior cingulate | 0.270    | -0.023   | -0.656   | 0.595 | -1.822   | 0.511    | 2155 |
| R Caudal anterior cingulate | 0.005    | -0.058   | -1.940   | 0.682 | -3.278   | -0.602   | 2150 |
| L Caudal middle frontal     | 0.217    | -0.025   | -1.825   | 1.478 | -4.723   | 1.073    | 2160 |
| R Caudal middle frontal     | 0.719    | -0.007   | -0.528   | 1.469 | -3.409   | 2.353    | 2159 |
| L Cuneus                    | 0.167    | -0.030   | -1.271   | 0.919 | -3.073   | 0.531    | 2016 |
| R Cuneus                    | 0.264    | -0.024   | -1.027   | 0.918 | -2.827   | 0.774    | 1981 |
| L Entorhinal                | 0.710    | -0.008   | -0.144   | 0.388 | -0.905   | 0.616    | 2123 |
| R Entorhinal                | 0.123    | 0.032    | 0.553    | 0.358 | -0.150   | 1.256    | 2071 |
| L Frontal pole              | 0.707    | -0.007   | -0.054   | 0.145 | -0.338   | 0.230    | 2166 |
| R Frontal pole              | 0.647    | 0.009    | 0.087    | 0.189 | -0.284   | 0.458    | 2166 |
| L Fusiform                  | 0.218    | -0.025   | -1.979   | 1.605 | -5.127   | 1.169    | 2135 |
| R Fusiform                  | 0.007    | -0.055   | -4.367   | 1.605 | -7.515   | -1.218   | 2147 |
| L Inferior parietal         | 0.340    | -0.019   | -2.367   | 2.482 | -7.234   | 2.500    | 2080 |
| R Inferior parietal         | 0.186    | -0.028   | -3.681   | 2.783 | -9.139   | 1.777    | 2095 |
| L Inferior temporal         | 0.006    | -0.057   | -5.395   | 1.945 | -9.209   | -1.581   | 2077 |
| R Inferior temporal         | 0.310    | -0.021   | -1.755   | 1.727 | -5.142   | 1.632    | 2103 |
| L Insula                    | 0.367    | 0.017    | 0.879    | 0.976 | -1.034   | 2.793    | 2162 |
| R Insula                    | 0.638    | -0.009   | -0.536   | 1.140 | -2.772   | 1.699    | 2153 |
| L Isthmus cingulate         | 0.898    | 0.003    | 0.092    | 0.716 | -1.312   | 1.495    | 2162 |
| R Isthmus cingulate         | 0.893    | 0.003    | 0.088    | 0.655 | -1.195   | 1.372    | 2157 |
| L Lateral occipital         | 0.116    | -0.032   | -3.855   | 2.452 | -8.663   | 0.953    | 2090 |
| R Lateral occipital         | 0.478    | 0.015    | 1.805    | 2.543 | -3.184   | 6.793    | 2106 |
| L Lateral orbitofrontal     | 0.008    | -0.055   | -3.004   | 1.131 | -5.222   | -0.786   | 2166 |
| R Lateral orbitofrontal     | 0.061    | -0.038   | -2.330   | 1.245 | -4.772   | 0.112    | 2161 |
| L Lingual                   | 0.002    | -0.063   | -5.567   | 1.821 | -9.139   | -1.996   | 2110 |

|                               |                  |               |               |              |               |               |             |
|-------------------------------|------------------|---------------|---------------|--------------|---------------|---------------|-------------|
| R Lingual                     | 0.026            | -0.046        | -3.969        | 1.786        | -7.472        | -0.466        | 2077        |
| <b>L Medial orbitofrontal</b> | <b>&lt;0.001</b> | <b>-0.078</b> | <b>-3.600</b> | <b>0.936</b> | <b>-5.435</b> | <b>-1.765</b> | <b>2145</b> |
| R Medial orbitofrontal        | 0.050            | -0.040        | -1.617        | 0.823        | -3.230        | -0.003        | 2140        |
| L Middle temporal             | 0.050            | -0.041        | -3.238        | 1.647        | -6.469        | -0.007        | 1970        |
| R Middle temporal             | 0.004            | -0.058        | -4.697        | 1.634        | -7.903        | -1.492        | 2088        |
| L Paracentral                 | 0.392            | -0.017        | -0.666        | 0.778        | -2.192        | 0.860         | 2150        |
| R Paracentral                 | 0.252            | -0.023        | -1.073        | 0.937        | -2.911        | 0.765         | 2141        |
| L Parahippocampal             | 0.058            | -0.038        | -0.855        | 0.451        | -1.739        | 0.028         | 2166        |
| R Parahippocampal             | 0.020            | -0.047        | -0.981        | 0.423        | -1.811        | -0.152        | 2153        |
| L Pars opercularis            | 0.222            | 0.025         | 1.279         | 1.047        | -0.774        | 3.331         | 2161        |
| R Pars opercularis            | 0.818            | 0.005         | 0.205         | 0.892        | -1.544        | 1.955         | 2156        |
| L Pars orbitalis              | 0.187            | -0.027        | -0.451        | 0.342        | -1.121        | 0.219         | 2155        |
| R Pars orbitalis              | 0.119            | -0.032        | -0.666        | 0.427        | -1.503        | 0.172         | 2157        |
| L Pars triangularis           | 0.849            | 0.004         | 0.151         | 0.792        | -1.402        | 1.704         | 2153        |
| R Pars triangularis           | 0.661            | -0.009        | -0.449        | 1.024        | -2.457        | 1.559         | 2143        |
| L Pericalcarine               | 0.029            | -0.047        | -2.466        | 1.131        | -4.683        | -0.248        | 2018        |
| R Pericalcarine               | 0.004            | -0.063        | -3.362        | 1.159        | -5.635        | -1.089        | 1955        |
| L Postcentral                 | 0.931            | 0.002         | 0.161         | 1.852        | -3.471        | 3.792         | 2042        |
| R Postcentral                 | 0.654            | 0.010         | 0.845         | 1.884        | -2.850        | 4.540         | 2035        |
| L Posterior cingulate         | 0.124            | -0.032        | -1.383        | 0.900        | -3.147        | 0.381         | 2168        |
| R Posterior cingulate         | 0.022            | -0.046        | -1.732        | 0.754        | -3.212        | -0.253        | 2165        |
| L Precentral                  | 0.862            | -0.004        | -0.360        | 2.065        | -4.409        | 3.689         | 2072        |
| R Precentral                  | 0.840            | -0.004        | -0.434        | 2.149        | -4.648        | 3.781         | 2085        |
| L Precuneus                   | 0.509            | -0.013        | -1.164        | 1.764        | -4.624        | 2.296         | 2165        |
| R Precuneus                   | 0.470            | -0.015        | -1.385        | 1.917        | -5.145        | 2.374         | 2164        |
| L Rostral anterior cingulate  | 0.222            | -0.025        | -0.829        | 0.679        | -2.160        | 0.502         | 2140        |
| R Rostral anterior cingulate  | 0.002            | -0.060        | -1.778        | 0.584        | -2.924        | -0.632        | 2144        |
| L Rostral middle frontal      | 0.003            | -0.060        | -8.506        | 2.827        | -14.050       | -2.961        | 2149        |
| R Rostral middle frontal      | 0.015            | -0.048        | -7.132        | 2.921        | -12.860       | -1.405        | 2160        |
| L Superior frontal            | 0.098            | -0.033        | -4.940        | 2.987        | -10.799       | 0.919         | 2121        |
| R Superior frontal            | 0.082            | -0.035        | -5.251        | 3.020        | -11.174       | 0.671         | 2124        |
| L Superior parietal           | 0.411            | -0.017        | -2.086        | 2.536        | -7.060        | 2.887         | 2098        |
| R Superior parietal           | 0.335            | -0.020        | -2.426        | 2.517        | -7.363        | 2.510         | 2115        |
| L Superior temporal           | 0.642            | -0.010        | -0.829        | 1.785        | -4.329        | 2.671         | 1892        |
| R Superior temporal           | 0.002            | -0.063        | -4.726        | 1.526        | -7.719        | -1.732        | 2011        |
| L Supramarginal               | 0.138            | -0.031        | -3.486        | 2.350        | -8.096        | 1.123         | 2050        |
| R Supramarginal               | 0.550            | -0.013        | -1.254        | 2.095        | -5.362        | 2.854         | 2081        |
| L Temporal pole               | 0.548            | -0.013        | -0.166        | 0.276        | -0.707        | 0.375         | 2079        |
| R Temporal pole               | 0.130            | 0.031         | 0.430         | 0.284        | -0.127        | 0.987         | 2083        |
| L Transverse temporal         | 0.587            | 0.011         | 0.179         | 0.329        | -0.466        | 0.823         | 2177        |
| R Transverse temporal         | 0.896            | -0.003        | -0.031        | 0.234        | -0.489        | 0.428         | 2176        |

Results of regression analysis of duration of illness and cortical surface area in PD sample. L – Left, R – Right, ROI – region of interest. Banks STS – Banks of the superior temporal sulcus. **Boldface** denotes significant results after Bonferroni correction.

### Supplementary table 14c: Results of regression analysis of duration of illness and subcortical volume

| ROI Subcortical | <i>p</i> | <i>r</i> | <i>b</i> | SE   | Lower CI | Upper CI | NPD  |
|-----------------|----------|----------|----------|------|----------|----------|------|
| L Amygdala      | <0.001   | -0.105   | -5.48    | 0.96 | -7.37    | -3.59    | 2153 |
| R Amygdala      | <0.001   | -0.102   | -5.88    | 1.04 | -7.92    | -3.83    | 2147 |



|                            |                  |               |               |             |               |              |             |
|----------------------------|------------------|---------------|---------------|-------------|---------------|--------------|-------------|
| <b>L Caudate nucleus</b>   | <b>&lt;0.001</b> | <b>-0.100</b> | <b>-10.85</b> | <b>2.11</b> | <b>-14.99</b> | <b>-6.71</b> | <b>2172</b> |
| <b>R Caudate nucleus</b>   | <b>&lt;0.001</b> | <b>-0.084</b> | <b>-9.17</b>  | <b>2.11</b> | <b>-13.31</b> | <b>-5.02</b> | <b>2176</b> |
| L Globus pallidus          | 0.613            | 0.009         | 0.61          | 1.20        | -1.74         | 2.95         | 2059        |
| R Globus pallidus          | 0.908            | 0.002         | 0.12          | 1.06        | -1.96         | 2.20         | 2120        |
| <b>L Hippocampus</b>       | <b>0.002</b>     | <b>-0.062</b> | <b>-6.40</b>  | <b>2.02</b> | <b>-10.36</b> | <b>-2.45</b> | <b>2128</b> |
| <b>R Hippocampus</b>       | <b>&lt;0.001</b> | <b>-0.065</b> | <b>-7.20</b>  | <b>2.10</b> | <b>-11.32</b> | <b>-3.09</b> | <b>2159</b> |
| L Lateral ventricle        | 0.656            | 0.009         | 13.90         | 31.20       | -47.29        | 75.09        | 2197        |
| R Lateral ventricle        | 0.378            | 0.018         | 25.67         | 29.10       | -31.40        | 82.73        | 2198        |
| <b>L Nucleus accumbens</b> | <b>&lt;0.001</b> | <b>-0.064</b> | <b>-1.79</b>  | <b>0.50</b> | <b>-2.77</b>  | <b>-0.81</b> | <b>2164</b> |
| R Nucleus accumbens        | 0.005            | -0.053        | -1.34         | 0.48        | -2.28         | -0.40        | 2138        |
| L Putamen                  | <0.001           | -0.070        | -10.66        | 2.90        | -16.35        | -4.97        | 2047        |
| R Putamen                  | 0.010            | -0.049        | -7.11         | 2.75        | -12.50        | -1.73        | 2103        |
| <b>L Thalamus</b>          | <b>0.003</b>     | <b>-0.051</b> | <b>-10.25</b> | <b>3.43</b> | <b>-16.98</b> | <b>-3.53</b> | <b>2072</b> |
| <b>R Thalamus</b>          | <b>&lt;0.001</b> | <b>-0.058</b> | <b>-9.88</b>  | <b>2.90</b> | <b>-15.57</b> | <b>-4.19</b> | <b>2128</b> |

Results of regression analysis of duration of illness and subcortical volume in PD sample. L – Left, R – Right, ROI – region of interest. **Boldface** denotes significant results after Bonferroni correction.

## Supplementary table 14d: Results of regression analysis of duration of illness and cortical thickness – uncorrected for age

| ROI Surface Area            | <i>p</i>         | <i>r</i>      | <i>b</i>      | SE           | Lower CI      | Upper CI      | NPD         |
|-----------------------------|------------------|---------------|---------------|--------------|---------------|---------------|-------------|
| L Banks STS                 | 0.001            | -0.058        | -0.003        | 0.001        | -0.005        | -0.001        | 1933        |
| R Banks STS                 | 0.014            | -0.043        | -0.002        | 0.001        | -0.004        | <0.001        | 2071        |
| L Caudal anterior cingulate | 0.226            | 0.023         | 0.002         | 0.001        | -0.001        | 0.004         | 2156        |
| R Caudal anterior cingulate | 0.748            | 0.006         | <0.001        | 0.001        | -0.002        | 0.003         | 2154        |
| L Caudal middle frontal     | 0.007            | -0.050        | -0.002        | 0.001        | -0.004        | -0.001        | 2163        |
| R Caudal middle frontal     | 0.028            | -0.041        | -0.002        | 0.001        | -0.003        | <0.001        | 2158        |
| L Cuneus                    | 0.143            | -0.027        | -0.001        | 0.001        | -0.002        | <0.001        | 2016        |
| R Cuneus                    | 0.553            | -0.010        | <0.001        | 0.001        | -0.002        | 0.001         | 1985        |
| L Entorhinal                | 0.014            | -0.047        | -0.004        | 0.002        | -0.007        | -0.001        | 2123        |
| R Entorhinal                | 0.001            | -0.055        | -0.006        | 0.002        | -0.009        | -0.002        | 2068        |
| L Frontal pole              | 0.413            | -0.016        | -0.001        | 0.001        | -0.004        | 0.001         | 2168        |
| R Frontal pole              | 0.923            | -0.002        | <0.001        | 0.001        | -0.003        | 0.002         | 2164        |
| <b>L Fusiform</b>           | <b>&lt;0.001</b> | <b>-0.073</b> | <b>-0.003</b> | <b>0.001</b> | <b>-0.005</b> | <b>-0.002</b> | <b>2135</b> |
| <b>R Fusiform</b>           | <b>&lt;0.001</b> | <b>-0.055</b> | <b>-0.003</b> | <b>0.001</b> | <b>-0.005</b> | <b>-0.002</b> | <b>2147</b> |
| <b>L Inferior parietal</b>  | <b>&lt;0.001</b> | <b>-0.082</b> | <b>-0.003</b> | <b>0.001</b> | <b>-0.005</b> | <b>-0.002</b> | <b>2079</b> |
| <b>R Inferior parietal</b>  | <b>&lt;0.001</b> | <b>-0.073</b> | <b>-0.003</b> | <b>0.001</b> | <b>-0.005</b> | <b>-0.002</b> | <b>2091</b> |
| L Inferior temporal         | 0.003            | -0.054        | -0.003        | 0.001        | -0.004        | -0.001        | 2074        |
| R Inferior temporal         | 0.005            | -0.047        | -0.002        | 0.001        | -0.004        | -0.001        | 2101        |
| L Insula                    | 0.020            | -0.046        | -0.002        | 0.001        | -0.004        | <0.001        | 2163        |
| R Insula                    | 0.005            | -0.049        | -0.003        | 0.001        | -0.005        | -0.001        | 2153        |
| L Isthmus cingulate         | 0.008            | -0.052        | -0.003        | 0.001        | -0.004        | -0.001        | 2162        |
| R Isthmus cingulate         | 0.530            | -0.012        | -0.001        | 0.001        | -0.003        | 0.001         | 2158        |
| L Lateral occipital         | 0.029            | -0.041        | -0.002        | 0.001        | -0.003        | <0.001        | 2088        |
| <b>R Lateral occipital</b>  | <b>&lt;0.001</b> | <b>-0.069</b> | <b>-0.003</b> | <b>0.001</b> | <b>-0.004</b> | <b>-0.001</b> | <b>2105</b> |
| L Lateral orbitofrontal     | 0.119            | -0.026        | -0.001        | 0.001        | -0.003        | <0.001        | 2166        |
| R Lateral orbitofrontal     | 0.079            | -0.027        | -0.001        | 0.001        | -0.003        | <0.001        | 2163        |
| L Lingual                   | 0.054            | -0.035        | -0.001        | 0.001        | -0.003        | <0.001        | 2113        |
| R Lingual                   | 0.005            | -0.046        | -0.002        | 0.001        | -0.003        | -0.001        | 2076        |

|                              |                  |               |               |              |               |               |             |
|------------------------------|------------------|---------------|---------------|--------------|---------------|---------------|-------------|
| L Medial orbitofrontal       | 0.412            | -0.015        | -0.001        | 0.001        | -0.002        | 0.001         | 2146        |
| R Medial orbitofrontal       | 0.175            | -0.022        | -0.001        | 0.001        | -0.003        | <0.001        | 2140        |
| <b>L Middle temporal</b>     | <b>&lt;0.001</b> | <b>-0.066</b> | <b>-0.003</b> | <b>0.001</b> | <b>-0.005</b> | <b>-0.001</b> | <b>1970</b> |
| R Middle temporal            | 0.005            | -0.048        | -0.002        | 0.001        | -0.004        | -0.001        | 2088        |
| L Paracentral                | 0.154            | -0.025        | -0.001        | 0.001        | -0.003        | <0.001        | 2153        |
| R Paracentral                | 0.047            | -0.036        | -0.002        | 0.001        | -0.004        | <0.001        | 2141        |
| L Parahippocampal            | 0.028            | -0.042        | -0.003        | 0.001        | -0.006        | <0.001        | 2167        |
| R Parahippocampal            | 0.482            | -0.013        | -0.001        | 0.001        | -0.003        | 0.002         | 2156        |
| <b>L Pars opercularis</b>    | <b>0.001</b>     | <b>-0.061</b> | <b>-0.003</b> | <b>0.001</b> | <b>-0.004</b> | <b>-0.001</b> | <b>2159</b> |
| R Pars opercularis           | 0.021            | -0.040        | -0.002        | 0.001        | -0.003        | <0.001        | 2155        |
| L Pars orbitalis             | 0.269            | -0.021        | -0.001        | 0.001        | -0.003        | 0.001         | 2157        |
| R Pars orbitalis             | 0.304            | -0.019        | -0.001        | 0.001        | -0.003        | 0.001         | 2154        |
| <b>L Pars triangularis</b>   | <b>&lt;0.001</b> | <b>-0.066</b> | <b>-0.003</b> | <b>0.001</b> | <b>-0.004</b> | <b>-0.001</b> | <b>2153</b> |
| R Pars triangularis          | 0.169            | -0.024        | -0.001        | 0.001        | -0.002        | <0.001        | 2142        |
| L Pericalcarine              | 0.093            | -0.030        | -0.001        | 0.001        | -0.003        | <0.001        | 2020        |
| R Pericalcarine              | 0.701            | -0.006        | <0.001        | 0.001        | -0.002        | 0.001         | 1956        |
| L Postcentral                | 0.001            | -0.058        | -0.002        | 0.001        | -0.003        | -0.001        | 2041        |
| R Postcentral                | 0.001            | -0.055        | -0.002        | 0.001        | -0.004        | -0.001        | 2037        |
| L Posterior cingulate        | 0.146            | -0.027        | -0.001        | 0.001        | -0.003        | <0.001        | 2168        |
| <b>R Posterior cingulate</b> | <b>&lt;0.001</b> | <b>-0.059</b> | <b>-0.003</b> | <b>0.001</b> | <b>-0.004</b> | <b>-0.001</b> | <b>2167</b> |
| L Precentral                 | 0.003            | -0.054        | -0.003        | 0.001        | -0.004        | -0.001        | 2073        |
| R Precentral                 | 0.005            | -0.051        | -0.002        | 0.001        | -0.004        | -0.001        | 2084        |
| <b>L Precuneus</b>           | <b>&lt;0.001</b> | <b>-0.077</b> | <b>-0.003</b> | <b>0.001</b> | <b>-0.005</b> | <b>-0.002</b> | <b>2162</b> |
| <b>R Precuneus</b>           | <b>&lt;0.001</b> | <b>-0.079</b> | <b>-0.003</b> | <b>0.001</b> | <b>-0.005</b> | <b>-0.002</b> | <b>2164</b> |
| L Rostral anterior cingulate | 0.313            | -0.019        | -0.001        | 0.001        | -0.003        | 0.001         | 2145        |
| R Rostral anterior cingulate | 0.549            | 0.011         | 0.001         | 0.001        | -0.002        | 0.003         | 2142        |
| L Rostral middle frontal     | 0.012            | -0.041        | -0.002        | 0.001        | -0.003        | <0.001        | 2149        |
| R Rostral middle frontal     | 0.045            | -0.031        | -0.001        | 0.001        | -0.003        | <0.001        | 2157        |
| L Superior frontal           | 0.008            | -0.048        | -0.002        | 0.001        | -0.003        | -0.001        | 2119        |
| R Superior frontal           | 0.001            | -0.055        | -0.002        | 0.001        | -0.004        | -0.001        | 2122        |
| <b>L Superior parietal</b>   | <b>&lt;0.001</b> | <b>-0.067</b> | <b>-0.003</b> | <b>0.001</b> | <b>-0.004</b> | <b>-0.001</b> | <b>2098</b> |
| <b>R Superior parietal</b>   | <b>&lt;0.001</b> | <b>-0.071</b> | <b>-0.003</b> | <b>0.001</b> | <b>-0.004</b> | <b>-0.002</b> | <b>2117</b> |
| <b>L Superior temporal</b>   | <b>&lt;0.001</b> | <b>-0.068</b> | <b>-0.003</b> | <b>0.001</b> | <b>-0.005</b> | <b>-0.002</b> | <b>1892</b> |
| R Superior temporal          | 0.011            | -0.041        | -0.002        | 0.001        | -0.004        | <0.001        | 2010        |
| L Supramarginal              | 0.002            | -0.055        | -0.002        | 0.001        | -0.004        | -0.001        | 2051        |
| <b>R Supramarginal</b>       | <b>0.001</b>     | <b>-0.061</b> | <b>-0.003</b> | <b>0.001</b> | <b>-0.004</b> | <b>-0.001</b> | <b>2076</b> |
| L Temporal pole              | 0.002            | -0.061        | -0.005        | 0.002        | -0.008        | -0.002        | 2077        |
| R Temporal pole              | 0.008            | -0.048        | -0.004        | 0.002        | -0.008        | -0.001        | 2083        |
| <b>L Transverse temporal</b> | <b>&lt;0.001</b> | <b>-0.075</b> | <b>-0.004</b> | <b>0.001</b> | <b>-0.006</b> | <b>-0.002</b> | <b>2178</b> |
| <b>R Transverse temporal</b> | <b>&lt;0.001</b> | <b>-0.053</b> | <b>-0.004</b> | <b>0.001</b> | <b>-0.007</b> | <b>-0.002</b> | <b>2175</b> |

Results of regression analysis of duration of illness and cortical surface area in PD sample. L – Left, R – Right, ROI – region of interest. Banks STS – Banks of the superior temporal sulcus. **Boldface** denotes significant results after Bonferroni correction.

### Supplementary table 14e: Results of regression analysis of duration of illness and cortical surface area – uncorrected for age

| ROI Surface Area | <i>p</i> | <i>r</i> | <b>b</b> | SE    | Lower CI | Upper CI | NPD  |
|------------------|----------|----------|----------|-------|----------|----------|------|
| L Banks STS      | 0.008    | -0.058   | -1.889   | 0.706 | -3.275   | -0.503   | 1931 |
| R Banks STS      | 0.009    | -0.053   | -1.602   | 0.613 | -2.803   | -0.401   | 2072 |

|                                     |                  |               |               |              |                |               |             |
|-------------------------------------|------------------|---------------|---------------|--------------|----------------|---------------|-------------|
| L Caudal anterior cingulate         | 0.108            | -0.033        | -0.961        | 0.597        | -2.133         | 0.210         | 2155        |
| R Caudal anterior cingulate         | 0.001            | -0.066        | -2.239        | 0.684        | -3.581         | -0.897        | 2150        |
| L Caudal middle frontal             | 0.071            | -0.037        | -2.691        | 1.488        | -5.609         | 0.227         | 2160        |
| R Caudal middle frontal             | 0.379            | -0.018        | -1.301        | 1.477        | -4.196         | 1.595         | 2159        |
| L Cuneus                            | 0.030            | -0.047        | -2.025        | 0.930        | -3.850         | -0.201        | 2016        |
| R Cuneus                            | 0.066            | -0.040        | -1.712        | 0.931        | -3.538         | 0.113         | 1981        |
| L Entorhinal                        | 0.495            | -0.014        | -0.264        | 0.387        | -1.023         | 0.494         | 2123        |
| R Entorhinal                        | 0.154            | 0.030         | 0.508         | 0.357        | -0.192         | 1.208         | 2071        |
| L Frontal pole                      | 0.485            | -0.013        | -0.101        | 0.145        | -0.385         | 0.183         | 2166        |
| R Frontal pole                      | 0.908            | 0.002         | 0.022         | 0.189        | -0.349         | 0.393         | 2166        |
| L Fusiform                          | 0.022            | -0.047        | -3.809        | 1.657        | -7.059         | -0.559        | 2135        |
| <b>R Fusiform</b>                   | <b>&lt;0.001</b> | <b>-0.075</b> | <b>-6.086</b> | <b>1.653</b> | <b>-9.328</b>  | <b>-2.844</b> | <b>2147</b> |
| L Inferior parietal                 | 0.074            | -0.036        | -4.528        | 2.531        | -9.491         | 0.435         | 2080        |
| R Inferior parietal                 | 0.024            | -0.047        | -6.488        | 2.865        | -12.107        | -0.869        | 2095        |
| <b>L Inferior temporal</b>          | <b>&lt;0.001</b> | <b>-0.074</b> | <b>-7.115</b> | <b>1.988</b> | <b>-11.013</b> | <b>-3.217</b> | <b>2077</b> |
| R Inferior temporal                 | 0.046            | -0.041        | -3.532        | 1.769        | -7.002         | -0.063        | 2103        |
| L Insula                            | 0.590            | 0.010         | 0.527         | 0.976        | -1.388         | 2.441         | 2162        |
| R Insula                            | 0.377            | -0.017        | -1.007        | 1.141        | -3.245         | 1.230         | 2153        |
| L Isthmus cingulate                 | 0.776            | -0.006        | -0.204        | 0.717        | -1.610         | 1.202         | 2162        |
| R Isthmus cingulate                 | 0.788            | -0.005        | -0.176        | 0.656        | -1.462         | 1.110         | 2157        |
| L Lateral occipital                 | 0.013            | -0.051        | -6.264        | 2.512        | -11.190        | -1.338        | 2090        |
| R Lateral occipital                 | 0.915            | -0.002        | -0.277        | 2.587        | -5.351         | 4.796         | 2106        |
| <b>L Lateral orbitofrontal</b>      | <b>&lt;0.001</b> | <b>-0.073</b> | <b>-4.117</b> | <b>1.161</b> | <b>-6.394</b>  | <b>-1.841</b> | <b>2166</b> |
| R Lateral orbitofrontal             | 0.009            | -0.053        | -3.300        | 1.266        | -5.782         | -0.819        | 2161        |
| <b>L Lingual</b>                    | <b>&lt;0.001</b> | <b>-0.084</b> | <b>-7.558</b> | <b>1.862</b> | <b>-11.210</b> | <b>-3.906</b> | <b>2110</b> |
| R Lingual                           | 0.002            | -0.064        | -5.619        | 1.824        | -9.196         | -2.042        | 2077        |
| <b>L Medial orbitofrontal</b>       | <b>&lt;0.001</b> | <b>-0.088</b> | <b>-4.095</b> | <b>0.941</b> | <b>-5.940</b>  | <b>-2.251</b> | <b>2145</b> |
| R Medial orbitofrontal              | 0.010            | -0.052        | -2.135        | 0.829        | -3.760         | -0.510        | 2140        |
| L Middle temporal                   | 0.006            | -0.058        | -4.636        | 1.694        | -7.958         | -1.315        | 1970        |
| <b>R Middle temporal</b>            | <b>&lt;0.001</b> | <b>-0.076</b> | <b>-6.214</b> | <b>1.674</b> | <b>-9.497</b>  | <b>-2.931</b> | <b>2088</b> |
| L Paracentral                       | 0.204            | -0.026        | -0.992        | 0.780        | -2.521         | 0.538         | 2150        |
| R Paracentral                       | 0.123            | -0.031        | -1.447        | 0.939        | -3.288         | 0.394         | 2141        |
| L Parahippocampal                   | 0.006            | -0.055        | -1.267        | 0.462        | -2.172         | -0.361        | 2166        |
| R Parahippocampal                   | 0.002            | -0.062        | -1.329        | 0.431        | -2.175         | -0.484        | 2153        |
| L Pars opercularis                  | 0.546            | 0.012         | 0.637         | 1.055        | -1.431         | 2.706         | 2161        |
| R Pars opercularis                  | 0.587            | -0.011        | -0.492        | 0.905        | -2.267         | 1.283         | 2156        |
| L Pars orbitalis                    | 0.040            | -0.041        | -0.711        | 0.347        | -1.391         | -0.032        | 2155        |
| R Pars orbitalis                    | 0.019            | -0.048        | -1.021        | 0.434        | -1.873         | -0.170        | 2157        |
| L Pars triangularis                 | 0.613            | -0.011        | -0.403        | 0.798        | -1.969         | 1.162         | 2153        |
| R Pars triangularis                 | 0.240            | -0.024        | -1.215        | 1.034        | -3.242         | 0.812         | 2143        |
| L Pericalcarine                     | 0.007            | -0.058        | -3.033        | 1.133        | -5.254         | -0.811        | 2018        |
| <b>R Pericalcarine</b>              | <b>0.001</b>     | <b>-0.073</b> | <b>-3.953</b> | <b>1.164</b> | <b>-6.236</b>  | <b>-1.671</b> | <b>1955</b> |
| L Postcentral                       | 0.580            | -0.012        | -1.032        | 1.867        | -4.693         | 2.629         | 2042        |
| R Postcentral                       | 0.951            | -0.001        | -0.116        | 1.892        | -3.827         | 3.594         | 2035        |
| L Posterior cingulate               | 0.030            | -0.045        | -1.978        | 0.909        | -3.761         | -0.195        | 2168        |
| R Posterior cingulate               | 0.002            | -0.063        | -2.442        | 0.770        | -3.953         | -0.931        | 2165        |
| L Precentral                        | 0.509            | -0.013        | -1.370        | 2.072        | -5.432         | 2.693         | 2072        |
| R Precentral                        | 0.492            | -0.014        | -1.479        | 2.153        | -5.702         | 2.744         | 2085        |
| L Precuneus                         | 0.102            | -0.033        | -2.970        | 1.813        | -6.526         | 0.586         | 2165        |
| R Precuneus                         | 0.115            | -0.032        | -3.080        | 1.954        | -6.912         | 0.752         | 2164        |
| L Rostral anterior cingulate        | 0.111            | -0.033        | -1.084        | 0.680        | -2.417         | 0.249         | 2140        |
| <b>R Rostral anterior cingulate</b> | <b>&lt;0.001</b> | <b>-0.070</b> | <b>-2.095</b> | <b>0.587</b> | <b>-3.247</b>  | <b>-0.944</b> | <b>2144</b> |

|                                 |                  |               |                |              |                |               |             |
|---------------------------------|------------------|---------------|----------------|--------------|----------------|---------------|-------------|
| <b>L Rostral middle frontal</b> | <b>&lt;0.001</b> | <b>-0.077</b> | <b>-11.100</b> | <b>2.893</b> | <b>-16.773</b> | <b>-5.427</b> | <b>2149</b> |
| R Rostral middle frontal        | 0.001            | -0.065        | -9.664         | 2.973        | -15.494        | -3.834        | 2160        |
| L Superior frontal              | 0.010            | -0.051        | -7.911         | 3.067        | -13.926        | -1.897        | 2121        |
| R Superior frontal              | 0.007            | -0.054        | -8.404         | 3.099        | -14.481        | -2.327        | 2124        |
| L Superior parietal             | 0.077            | -0.037        | -4.601         | 2.596        | -9.692         | 0.491         | 2098        |
| R Superior parietal             | 0.056            | -0.039        | -4.928         | 2.577        | -9.981         | 0.125         | 2115        |
| L Superior temporal             | 0.233            | -0.025        | -2.154         | 1.807        | -5.698         | 1.390         | 1892        |
| <b>R Superior temporal</b>      | <b>&lt;0.001</b> | <b>-0.078</b> | <b>-5.885</b>  | <b>1.546</b> | <b>-8.917</b>  | <b>-2.853</b> | <b>2011</b> |
| L Supramarginal                 | 0.028            | -0.046        | -5.214         | 2.375        | -9.872         | -0.556        | 2050        |
| R Supramarginal                 | 0.202            | -0.027        | -2.699         | 2.116        | -6.849         | 1.451         | 2081        |
| L Temporal pole                 | 0.323            | -0.021        | -0.273         | 0.277        | -0.816         | 0.269         | 2079        |
| R Temporal pole                 | 0.195            | 0.026         | 0.367          | 0.283        | -0.189         | 0.923         | 2083        |
| L Transverse temporal           | 0.937            | -0.002        | -0.026         | 0.331        | -0.675         | 0.623         | 2177        |
| R Transverse temporal           | 0.559            | -0.012        | -0.137         | 0.235        | -0.597         | 0.323         | 2176        |

Results of regression analysis of duration of illness and cortical surface area in PD sample. L – Left, R – Right, ROI – region of interest. Banks STS – Banks of the superior temporal sulcus. **Boldface** denotes significant results after Bonferroni correction.

### Supplementary table 14f: Results of regression analysis of duration of illness and subcortical volume – uncorrected for age

| ROI Subcortical            | <i>p</i>         | <i>r</i>      | <i>b</i>       | SE           | Lower CI       | Upper CI       | NPD         |
|----------------------------|------------------|---------------|----------------|--------------|----------------|----------------|-------------|
| <b>L Amygdala</b>          | <b>&lt;0.001</b> | <b>-0.131</b> | <b>-7.298</b>  | <b>1.043</b> | <b>-9.343</b>  | <b>-5.252</b>  | <b>2153</b> |
| <b>R Amygdala</b>          | <b>&lt;0.001</b> | <b>-0.126</b> | <b>-7.600</b>  | <b>1.102</b> | <b>-9.761</b>  | <b>-5.439</b>  | <b>2147</b> |
| <b>L Caudate nucleus</b>   | <b>&lt;0.001</b> | <b>-0.107</b> | <b>-11.603</b> | <b>2.109</b> | <b>-15.739</b> | <b>-7.467</b>  | <b>2172</b> |
| <b>R Caudate nucleus</b>   | <b>&lt;0.001</b> | <b>-0.089</b> | <b>-9.674</b>  | <b>2.109</b> | <b>-13.810</b> | <b>-5.537</b>  | <b>2176</b> |
| L Globus pallidus          | 0.929            | -0.002        | -0.107         | 1.205        | -2.470         | 2.256          | 2059        |
| R Globus pallidus          | 0.560            | -0.010        | -0.629         | 1.077        | -2.742         | 1.484          | 2120        |
| <b>L Hippocampus</b>       | <b>&lt;0.001</b> | <b>-0.094</b> | <b>-10.590</b> | <b>2.229</b> | <b>-14.961</b> | <b>-6.220</b>  | <b>2128</b> |
| <b>R Hippocampus</b>       | <b>&lt;0.001</b> | <b>-0.094</b> | <b>-11.138</b> | <b>2.308</b> | <b>-15.665</b> | <b>-6.611</b>  | <b>2159</b> |
| L Lateral ventricle        | 0.021            | 0.048         | 79.766         | 34.507       | 12.096         | 147.437        | 2197        |
| R Lateral ventricle        | 0.009            | 0.055         | 83.643         | 31.992       | 20.903         | 146.382        | 2198        |
| <b>L Nucleus accumbens</b> | <b>&lt;0.001</b> | <b>-0.094</b> | <b>-2.770</b>  | <b>0.540</b> | <b>-3.830</b>  | <b>-1.711</b>  | <b>2164</b> |
| R Nucleus accumbens        | <b>&lt;0.001</b> | <b>-0.082</b> | <b>-2.191</b>  | <b>0.512</b> | <b>-3.195</b>  | <b>-1.187</b>  | <b>2138</b> |
| L Putamen                  | <b>&lt;0.001</b> | <b>-0.095</b> | <b>-15.451</b> | <b>3.083</b> | <b>-21.498</b> | <b>-9.405</b>  | <b>2047</b> |
| R Putamen                  | <b>&lt;0.001</b> | <b>-0.074</b> | <b>-11.331</b> | <b>2.915</b> | <b>-17.048</b> | <b>-5.615</b>  | <b>2103</b> |
| <b>L Thalamus</b>          | <b>&lt;0.001</b> | <b>-0.084</b> | <b>-18.775</b> | <b>3.893</b> | <b>-26.409</b> | <b>-11.141</b> | <b>2072</b> |
| <b>R Thalamus</b>          | <b>&lt;0.001</b> | <b>-0.089</b> | <b>-16.724</b> | <b>3.314</b> | <b>-23.224</b> | <b>-10.225</b> | <b>2128</b> |

Results of regression analysis of duration of illness and subcortical volume in PD sample. L – Left, R – Right, ROI – region of interest. **Boldface** denotes significant results after Bonferroni correction.

## Supplementary Table 15a: Cortical thickness results - MoCA regression analysis corrected for DURILL

| ROI Thickness                  | <i>p</i>         | <i>r</i>     | <b>b</b>     | SE           | Lower CI     | Upper CI     | NPD         |
|--------------------------------|------------------|--------------|--------------|--------------|--------------|--------------|-------------|
| L Banks STS                    | 0.003            | 0.076        | 0.006        | 0.002        | 0.002        | 0.010        | 940         |
| R Banks STS                    | 0.002            | 0.077        | 0.006        | 0.002        | 0.002        | 0.010        | 1005        |
| L Caudal anterior cingulate    | 0.404            | 0.023        | 0.002        | 0.003        | -0.003       | 0.008        | 1026        |
| R Caudal anterior cingulate    | 0.418            | 0.021        | 0.002        | 0.003        | -0.003       | 0.007        | 1025        |
| <b>L Caudal middle frontal</b> | <b>&lt;0.001</b> | <b>0.118</b> | <b>0.007</b> | <b>0.002</b> | <b>0.004</b> | <b>0.011</b> | <b>1034</b> |
| <b>R Caudal middle frontal</b> | <b>&lt;0.001</b> | <b>0.100</b> | <b>0.006</b> | <b>0.002</b> | <b>0.003</b> | <b>0.009</b> | <b>1034</b> |
| L Cuneus                       | 0.178            | 0.038        | 0.002        | 0.002        | -0.001       | 0.005        | 939         |
| R Cuneus                       | 0.522            | 0.017        | 0.001        | 0.002        | -0.002       | 0.004        | 929         |
| L Entorhinal                   | 0.047            | 0.055        | 0.007        | 0.003        | <0.001       | 0.013        | 1017        |
| R Entorhinal                   | 0.034            | 0.059        | 0.008        | 0.004        | 0.001        | 0.015        | 1011        |
| <b>L Frontal pole</b>          | <b>&lt;0.001</b> | <b>0.105</b> | <b>0.011</b> | <b>0.003</b> | <b>0.005</b> | <b>0.016</b> | <b>1031</b> |
| R Frontal pole                 | 0.008            | 0.074        | 0.007        | 0.003        | 0.002        | 0.013        | 1030        |
| <b>L Fusiform</b>              | <b>&lt;0.001</b> | <b>0.134</b> | <b>0.009</b> | <b>0.002</b> | <b>0.006</b> | <b>0.012</b> | <b>1012</b> |
| <b>R Fusiform</b>              | <b>&lt;0.001</b> | <b>0.140</b> | <b>0.010</b> | <b>0.002</b> | <b>0.006</b> | <b>0.013</b> | <b>1019</b> |
| L Inferior parietal            | 0.009            | 0.066        | 0.004        | 0.002        | 0.001        | 0.007        | 1006        |
| <b>R Inferior parietal</b>     | <b>0.001</b>     | <b>0.085</b> | <b>0.005</b> | <b>0.002</b> | <b>0.002</b> | <b>0.008</b> | <b>1004</b> |
| <b>L Inferior temporal</b>     | <b>&lt;0.001</b> | <b>0.104</b> | <b>0.007</b> | <b>0.002</b> | <b>0.004</b> | <b>0.010</b> | <b>991</b>  |
| <b>R Inferior temporal</b>     | <b>&lt;0.001</b> | <b>0.104</b> | <b>0.007</b> | <b>0.002</b> | <b>0.004</b> | <b>0.010</b> | <b>1007</b> |
| <b>L Insula</b>                | <b>&lt;0.001</b> | <b>0.114</b> | <b>0.007</b> | <b>0.002</b> | <b>0.004</b> | <b>0.011</b> | <b>1031</b> |
| <b>R Insula</b>                | <b>&lt;0.001</b> | <b>0.120</b> | <b>0.009</b> | <b>0.002</b> | <b>0.005</b> | <b>0.012</b> | <b>1028</b> |
| L Isthmus cingulate            | 0.034            | 0.058        | 0.004        | 0.002        | <0.001       | 0.008        | 1031        |
| R Isthmus cingulate            | 0.006            | 0.076        | 0.006        | 0.002        | 0.002        | 0.010        | 1031        |
| L Lateral occipital            | 0.667            | 0.011        | 0.001        | 0.001        | -0.002       | 0.003        | 1006        |
| R Lateral occipital            | 0.027            | 0.056        | 0.003        | 0.001        | <0.001       | 0.006        | 1007        |
| L Lateral orbitofrontal        | 0.006            | 0.065        | 0.005        | 0.002        | 0.001        | 0.008        | 1025        |
| <b>R Lateral orbitofrontal</b> | <b>&lt;0.001</b> | <b>0.083</b> | <b>0.006</b> | <b>0.002</b> | <b>0.003</b> | <b>0.009</b> | <b>1026</b> |
| L Lingual                      | 0.003            | 0.079        | 0.004        | 0.001        | 0.001        | 0.007        | 998         |
| R Lingual                      | 0.008            | 0.071        | 0.004        | 0.001        | 0.001        | 0.006        | 981         |
| L Medial orbitofrontal         | 0.001            | 0.087        | 0.006        | 0.002        | 0.002        | 0.009        | 1019        |
| R Medial orbitofrontal         | 0.004            | 0.069        | 0.005        | 0.002        | 0.002        | 0.009        | 1022        |
| <b>L Middle temporal</b>       | <b>&lt;0.001</b> | <b>0.127</b> | <b>0.009</b> | <b>0.002</b> | <b>0.006</b> | <b>0.013</b> | <b>943</b>  |
| <b>R Middle temporal</b>       | <b>&lt;0.001</b> | <b>0.097</b> | <b>0.007</b> | <b>0.002</b> | <b>0.004</b> | <b>0.011</b> | <b>1005</b> |
| L Paracentral                  | 0.002            | 0.083        | 0.006        | 0.002        | 0.002        | 0.009        | 1028        |
| R Paracentral                  | 0.002            | 0.084        | 0.006        | 0.002        | 0.002        | 0.009        | 1026        |
| L Parahippocampal              | 0.186            | 0.037        | 0.004        | 0.003        | -0.002       | 0.010        | 1030        |
| R Parahippocampal              | 0.003            | 0.080        | 0.008        | 0.003        | 0.003        | 0.013        | 1030        |
| <b>L Pars opercularis</b>      | <b>&lt;0.001</b> | <b>0.091</b> | <b>0.006</b> | <b>0.002</b> | <b>0.003</b> | <b>0.009</b> | <b>1025</b> |
| R Pars opercularis             | 0.001            | 0.082        | 0.005        | 0.002        | 0.002        | 0.009        | 1023        |
| L Pars orbitalis               | 0.062            | 0.050        | 0.004        | 0.002        | <0.001       | 0.008        | 1025        |
| R Pars orbitalis               | 0.027            | 0.057        | 0.004        | 0.002        | <0.001       | 0.008        | 1024        |
| <b>L Pars triangularis</b>     | <b>&lt;0.001</b> | <b>0.134</b> | <b>0.009</b> | <b>0.002</b> | <b>0.006</b> | <b>0.012</b> | <b>1023</b> |
| <b>R Pars triangularis</b>     | <b>&lt;0.001</b> | <b>0.101</b> | <b>0.006</b> | <b>0.002</b> | <b>0.003</b> | <b>0.009</b> | <b>1022</b> |
| L Pericalcarine                | 0.360            | 0.025        | 0.001        | 0.002        | -0.002       | 0.005        | 940         |
| R Pericalcarine                | 0.260            | 0.031        | 0.002        | 0.002        | -0.001       | 0.005        | 912         |

|                                     |                  |              |              |              |              |              |             |
|-------------------------------------|------------------|--------------|--------------|--------------|--------------|--------------|-------------|
| <b>L Postcentral</b>                | <b>&lt;0.001</b> | <b>0.092</b> | <b>0.005</b> | <b>0.001</b> | <b>0.002</b> | <b>0.008</b> | <b>995</b>  |
| R Postcentral                       | 0.004            | 0.074        | 0.004        | 0.001        | 0.001        | 0.007        | 996         |
| L Posterior cingulate               | 0.002            | 0.078        | 0.005        | 0.002        | 0.002        | 0.009        | 1032        |
| R Posterior cingulate               | 0.009            | 0.067        | 0.005        | 0.002        | 0.001        | 0.008        | 1031        |
| <b>L Precentral</b>                 | <b>&lt;0.001</b> | <b>0.122</b> | <b>0.008</b> | <b>0.002</b> | <b>0.005</b> | <b>0.012</b> | <b>1018</b> |
| <b>R Precentral</b>                 | <b>&lt;0.001</b> | <b>0.113</b> | <b>0.008</b> | <b>0.002</b> | <b>0.004</b> | <b>0.011</b> | <b>1021</b> |
| L Precuneus                         | 0.001            | 0.079        | 0.005        | 0.001        | 0.002        | 0.008        | 1033        |
| <b>R Precuneus</b>                  | <b>&lt;0.001</b> | <b>0.093</b> | <b>0.006</b> | <b>0.001</b> | <b>0.003</b> | <b>0.009</b> | <b>1032</b> |
| <b>L Rostral anterior cingulate</b> | <b>&lt;0.001</b> | <b>0.095</b> | <b>0.009</b> | <b>0.002</b> | <b>0.004</b> | <b>0.014</b> | <b>1022</b> |
| R Rostral anterior cingulate        | 0.236            | 0.032        | 0.003        | 0.003        | -0.002       | 0.008        | 1025        |
| <b>L Rostral middle frontal</b>     | <b>&lt;0.001</b> | <b>0.109</b> | <b>0.006</b> | <b>0.001</b> | <b>0.004</b> | <b>0.009</b> | <b>1026</b> |
| R Rostral middle frontal            | 0.004            | 0.067        | 0.004        | 0.001        | 0.001        | 0.007        | 1026        |
| <b>L Superior frontal</b>           | <b>&lt;0.001</b> | <b>0.097</b> | <b>0.006</b> | <b>0.002</b> | <b>0.003</b> | <b>0.009</b> | <b>1012</b> |
| <b>R Superior frontal</b>           | <b>&lt;0.001</b> | <b>0.101</b> | <b>0.006</b> | <b>0.002</b> | <b>0.003</b> | <b>0.009</b> | <b>1012</b> |
| L Superior parietal                 | 0.015            | 0.062        | 0.004        | 0.001        | 0.001        | 0.007        | 1003        |
| R Superior parietal                 | 0.009            | 0.065        | 0.004        | 0.001        | 0.001        | 0.007        | 1017        |
| <b>L Superior temporal</b>          | <b>&lt;0.001</b> | <b>0.114</b> | <b>0.008</b> | <b>0.002</b> | <b>0.004</b> | <b>0.011</b> | <b>904</b>  |
| <b>R Superior temporal</b>          | <b>&lt;0.001</b> | <b>0.112</b> | <b>0.008</b> | <b>0.002</b> | <b>0.005</b> | <b>0.011</b> | <b>979</b>  |
| L Supramarginal                     | 0.004            | 0.075        | 0.005        | 0.002        | 0.002        | 0.008        | 997         |
| R Supramarginal                     | 0.005            | 0.073        | 0.005        | 0.002        | 0.001        | 0.008        | 1005        |
| L Temporal pole                     | 0.029            | 0.064        | 0.008        | 0.004        | 0.001        | 0.015        | 971         |
| R Temporal pole                     | 0.004            | 0.084        | 0.010        | 0.004        | 0.003        | 0.017        | 999         |
| L Transverse temporal               | 0.004            | 0.081        | 0.007        | 0.002        | 0.002        | 0.011        | 1036        |
| R Transverse temporal               | 0.001            | 0.093        | 0.008        | 0.002        | 0.003        | 0.013        | 1035        |

Results of regression analysis of duration of illness and cortical thickness in PD sample. L – Left, R – Right, ROI – region of interest. Banks STS – Banks of the superior temporal sulcus. **Boldface** denotes significant results after Bonferroni correction.

## Supplementary Table 15b: Cortical surface area results - MoCA regression analysis corrected for DURILL

| ROI Thickness               | <i>p</i>         | <i>r</i>     | <i>b</i>     | SE          | Lower CI     | Upper CI     | NPD         |
|-----------------------------|------------------|--------------|--------------|-------------|--------------|--------------|-------------|
| L Banks STS                 | 0.011            | 0.081        | 4.12         | 1.62        | 0.94         | 7.30         | 940         |
| R Banks STS                 | 0.253            | 0.034        | 1.61         | 1.41        | -1.15        | 4.37         | 1005        |
| L Caudal anterior cingulate | 0.055            | 0.058        | 2.75         | 1.43        | -0.05        | 5.55         | 1026        |
| R Caudal anterior cingulate | 0.069            | 0.054        | 2.92         | 1.60        | -0.22        | 6.06         | 1025        |
| L Caudal middle frontal     | 0.069            | 0.055        | 6.26         | 3.44        | -0.49        | 13.01        | 1035        |
| R Caudal middle frontal     | 0.388            | 0.026        | 2.90         | 3.35        | -3.68        | 9.48         | 1035        |
| L Cuneus                    | 0.797            | 0.008        | 0.52         | 2.02        | -3.45        | 4.49         | 939         |
| R Cuneus                    | 0.509            | 0.021        | 1.44         | 2.18        | -2.83        | 5.70         | 929         |
| L Entorhinal                | 0.873            | -0.005       | -0.15        | 0.92        | -1.95        | 1.65         | 1017        |
| R Entorhinal                | 0.797            | 0.008        | 0.22         | 0.85        | -1.45        | 1.89         | 1012        |
| L Frontal pole              | 0.370            | 0.024        | 0.28         | 0.31        | -0.33        | 0.90         | 1031        |
| R Frontal pole              | 0.155            | 0.040        | 0.59         | 0.42        | -0.22        | 1.41         | 1030        |
| L Fusiform                  | 0.898            | 0.004        | 0.44         | 3.47        | -6.36        | 7.25         | 1013        |
| R Fusiform                  | 0.750            | 0.010        | 1.06         | 3.33        | -5.48        | 7.60         | 1018        |
| L Inferior parietal         | 0.133            | 0.045        | 8.04         | 5.34        | -2.44        | 18.53        | 1006        |
| <b>R Inferior parietal</b>  | <b>&lt;0.001</b> | <b>0.116</b> | <b>22.92</b> | <b>5.99</b> | <b>11.16</b> | <b>34.67</b> | <b>1004</b> |

|                              |                  |              |             |             |             |              |             |
|------------------------------|------------------|--------------|-------------|-------------|-------------|--------------|-------------|
| L Inferior temporal          | 0.462            | 0.023        | 3.15        | 4.28        | -5.25       | 11.56        | 991         |
| R Inferior temporal          | 0.288            | 0.032        | 4.01        | 3.77        | -3.39       | 11.41        | 1007        |
| L Insula                     | 0.487            | 0.020        | 1.44        | 2.07        | -2.63       | 5.51         | 1031        |
| R Insula                     | 0.622            | -0.014       | -1.23       | 2.50        | -6.14       | 3.67         | 1028        |
| L Isthmus cingulate          | 0.104            | 0.047        | 2.45        | 1.51        | -0.51       | 5.40         | 1031        |
| R Isthmus cingulate          | 0.591            | -0.016       | -0.77       | 1.44        | -3.59       | 2.04         | 1031        |
| L Lateral occipital          | 0.856            | 0.005        | 0.96        | 5.27        | -9.38       | 11.30        | 1006        |
| R Lateral occipital          | 0.012            | 0.074        | 14.32       | 5.70        | 3.13        | 25.50        | 1007        |
| L Lateral orbitofrontal      | 0.341            | 0.029        | 2.38        | 2.50        | -2.52       | 7.29         | 1026        |
| R Lateral orbitofrontal      | 0.214            | 0.037        | 3.41        | 2.74        | -1.97       | 8.79         | 1027        |
| L Lingual                    | 0.238            | 0.037        | 4.57        | 3.87        | -3.02       | 12.16        | 998         |
| R Lingual                    | 0.398            | 0.026        | 3.27        | 3.86        | -4.32       | 10.85        | 981         |
| L Medial orbitofrontal       | 0.430            | 0.024        | 1.63        | 2.07        | -2.42       | 5.69         | 1018        |
| R Medial orbitofrontal       | 0.625            | -0.015       | -0.89       | 1.83        | -4.47       | 2.69         | 1021        |
| L Middle temporal            | 0.156            | 0.044        | 5.17        | 3.64        | -1.98       | 12.31        | 943         |
| R Middle temporal            | 0.142            | 0.044        | 5.25        | 3.57        | -1.76       | 12.26        | 1005        |
| L Paracentral                | 0.962            | 0.001        | 0.08        | 1.65        | -3.17       | 3.33         | 1028        |
| R Paracentral                | 0.537            | -0.019       | -1.31       | 2.13        | -5.49       | 2.86         | 1026        |
| L Parahippocampal            | 0.124            | 0.046        | 1.47        | 0.95        | -0.40       | 3.34         | 1030        |
| R Parahippocampal            | 0.138            | 0.045        | 1.40        | 0.94        | -0.45       | 3.24         | 1030        |
| <b>L Pars opercularis</b>    | <b>&lt;0.001</b> | <b>0.106</b> | <b>7.99</b> | <b>2.27</b> | <b>3.54</b> | <b>12.45</b> | <b>1025</b> |
| R Pars opercularis           | 0.236            | 0.036        | 2.34        | 1.97        | -1.53       | 6.20         | 1023        |
| L Pars orbitalis             | 0.016            | 0.070        | 1.84        | 0.76        | 0.35        | 3.33         | 1025        |
| R Pars orbitalis             | 0.078            | 0.052        | 1.68        | 0.95        | -0.19       | 3.55         | 1024        |
| L Pars triangularis          | 0.043            | 0.062        | 3.62        | 1.79        | 0.11        | 7.13         | 1023        |
| R Pars triangularis          | 0.295            | 0.032        | 2.35        | 2.24        | -2.05       | 6.74         | 1022        |
| L Pericalcarine              | 0.848            | -0.006       | -0.50       | 2.62        | -5.65       | 4.64         | 940         |
| R Pericalcarine              | 0.532            | -0.020       | -1.61       | 2.58        | -6.66       | 3.45         | 912         |
| L Postcentral                | 0.207            | 0.039        | 5.11        | 4.04        | -2.83       | 13.04        | 995         |
| R Postcentral                | 0.092            | 0.052        | 6.89        | 4.09        | -1.14       | 14.91        | 996         |
| L Posterior cingulate        | 0.226            | 0.036        | 2.51        | 2.07        | -1.56       | 6.58         | 1032        |
| R Posterior cingulate        | 0.376            | 0.025        | 1.46        | 1.65        | -1.78       | 4.70         | 1031        |
| L Precentral                 | 0.300            | 0.031        | 4.62        | 4.45        | -4.12       | 13.35        | 1018        |
| R Precentral                 | 0.014            | 0.073        | 11.26       | 4.59        | 2.24        | 20.27        | 1021        |
| L Precuneus                  | 0.004            | 0.085        | 11.31       | 3.93        | 3.59        | 19.03        | 1033        |
| R Precuneus                  | 0.113            | 0.047        | 6.68        | 4.21        | -1.59       | 14.95        | 1032        |
| L Rostral anterior cingulate | 0.671            | -0.013       | -0.68       | 1.61        | -3.84       | 2.47         | 1022        |
| R Rostral anterior cingulate | 0.442            | 0.022        | 1.00        | 1.30        | -1.55       | 3.55         | 1025        |
| L Rostral middle frontal     | 0.627            | 0.014        | 3.05        | 6.27        | -9.25       | 15.34        | 1026        |
| R Rostral middle frontal     | 0.321            | 0.029        | 6.37        | 6.42        | -6.22       | 18.96        | 1026        |
| L Superior frontal           | 0.963            | -0.001       | -0.31       | 6.72        | -13.50      | 12.88        | 1013        |
| R Superior frontal           | 0.209            | 0.037        | 8.74        | 6.95        | -4.91       | 22.39        | 1012        |
| L Superior parietal          | 0.001            | 0.099        | 18.46       | 5.60        | 7.46        | 29.45        | 1003        |
| R Superior parietal          | 0.003            | 0.090        | 16.35       | 5.42        | 5.72        | 26.99        | 1017        |
| L Superior temporal          | 0.208            | 0.039        | 4.97        | 3.94        | -2.77       | 12.70        | 904         |
| R Superior temporal          | 0.524            | 0.019        | 2.12        | 3.33        | -4.41       | 8.65         | 979         |
| L Supramarginal              | 0.003            | 0.090        | 16.10       | 5.38        | 5.54        | 26.67        | 997         |
| R Supramarginal              | 0.477            | 0.022        | 3.40        | 4.79        | -5.99       | 12.80        | 1005        |
| L Temporal pole              | 0.380            | 0.027        | 0.56        | 0.64        | -0.69       | 1.80         | 971         |
| R Temporal pole              | 0.806            | -0.007       | -0.16       | 0.63        | -1.40       | 1.09         | 999         |
| L Transverse temporal        | 0.023            | 0.068        | 1.72        | 0.76        | 0.24        | 3.21         | 1036        |

Results of regression analysis of duration of illness and cortical thickness in PD sample. L – Left, R – Right, ROI – region of interest. Banks STS – Banks of the superior temporal sulcus. **Boldface** denotes significant results after Bonferroni correction.

### Supplementary Table 15c: Subcortical volume results - MoCA regression analysis corrected for DURILL

| ROI Subcortical            | <i>p</i>         | <i>r</i>      | <b>b</b>       | SE           | Lower CI       | Upper CI       | NPD         |
|----------------------------|------------------|---------------|----------------|--------------|----------------|----------------|-------------|
| <b>L Amygdala</b>          | <b>&lt;0.001</b> | <b>0.123</b>  | <b>9.89</b>    | <b>2.10</b>  | <b>5.76</b>    | <b>14.01</b>   | <b>1047</b> |
| <b>R Amygdala</b>          | <b>&lt;0.001</b> | <b>0.101</b>  | <b>8.72</b>    | <b>2.21</b>  | <b>4.38</b>    | <b>13.06</b>   | <b>1049</b> |
| L Caudate nucleus          | 0.505            | 0.019         | 3.22           | 4.83         | -6.26          | 12.70          | 1044        |
| R Caudate nucleus          | 0.680            | 0.012         | 2.04           | 4.94         | -7.66          | 11.75          | 1045        |
| L Globus pallidus          | 0.877            | 0.004         | 0.39           | 2.55         | -4.61          | 5.40           | 1023        |
| R Globus pallidus          | 0.518            | 0.016         | 1.49           | 2.31         | -3.04          | 6.03           | 1040        |
| <b>L Hippocampus</b>       | <b>&lt;0.001</b> | <b>0.104</b>  | <b>16.37</b>   | <b>4.28</b>  | <b>7.97</b>    | <b>24.77</b>   | <b>1033</b> |
| <b>R Hippocampus</b>       | <b>&lt;0.001</b> | <b>0.112</b>  | <b>19.14</b>   | <b>4.50</b>  | <b>10.31</b>   | <b>27.97</b>   | <b>1046</b> |
| <b>L Lateral ventricle</b> | <b>&lt;0.001</b> | <b>-0.120</b> | <b>-300.98</b> | <b>74.52</b> | <b>-447.21</b> | <b>-154.75</b> | <b>1051</b> |
| <b>R Lateral ventricle</b> | <b>&lt;0.001</b> | <b>-0.116</b> | <b>-273.45</b> | <b>69.39</b> | <b>-409.62</b> | <b>-137.28</b> | <b>1051</b> |
| L Nucleus accumbens        | 0.031            | 0.056         | 2.50           | 1.16         | 0.23           | 4.77           | 1048        |
| R Nucleus accumbens        | 0.173            | 0.038         | 1.49           | 1.09         | -0.65          | 3.63           | 1049        |
| L Putamen                  | 0.008            | 0.071         | 16.10          | 6.10         | 4.13           | 28.07          | 1024        |
| R Putamen                  | 0.055            | 0.054         | 11.38          | 5.92         | -0.24          | 23.01          | 1039        |
| L Thalamus                 | 0.111            | 0.043         | 11.84          | 7.43         | -2.74          | 26.42          | 1009        |
| R Thalamus                 | 0.145            | 0.038         | 9.12           | 6.26         | -3.16          | 21.40          | 1023        |

Results of regression analysis of duration of illness and subcortical volume in PD sample. L – Left, R – Right, ROI – region of interest. **Boldface** denotes significant results after Bonferroni correction.



## Supplementary figure S1: World map participating sites

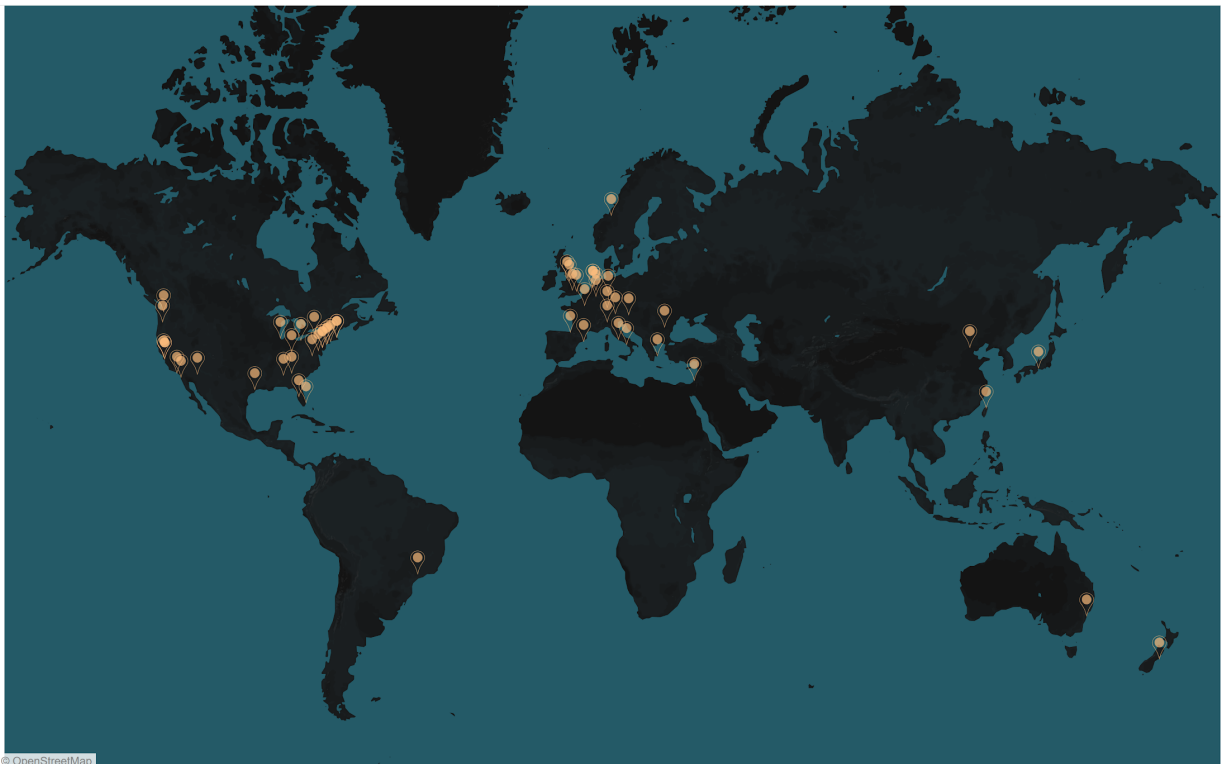

© 2020 Mapbox © OpenStreetMap
